# Supplementary material for: Network Biology Identifies Novel Regulators of CFTR Trafficking and Membrane Stability
Source: Front Pharmacol. 2019 Jun 4;10:619. doi: 10.3389/fphar.2019.00619 (PMC6559121; doi:10.3389/fphar.2019.00619)
Supplement: Table S1 — Specific common neighbours of CFTR interactor sets. [file Table_1.xlsx]

## Sheet: Sheet1
		Number of direct neighbors							Neighbor enrichment p-value (-log10(p-value))					Rank of p-value (1 corresponds to lowest p-value)												Bridge score				Rank of Bridge score (1 correspond to highest score)
uniprot	symb	wt_neib	rescued_neib	epac_neib	pep-py_neib	pep-wt_neib	allneib	degree	p_wt	p_rescued	p_epac	p_pep-py	p_pep-wt	R_wt	R_rescued	R_epac	R_pep-py	R_pep-wt	Sum R (if R>=0,95)	is_wt	is_rescued	is_epac	is_pep-py	is_pep-wt	is_multi	W_cftr-epac	W_cftr-ezrin	W_cftr-nherf1	W_cftr-syk	R_cftr-epac	R_cftr-ezrin	R_cftr-nherf1	R_cftr-syk
P02751	FN1	12	68	17	28	9	113	676	7.47556	58.6472	13.2083	25.595	8.97681	0.980546	0.979326	0.982985	0.980894	0.980081	4.90383	0	0	0	1	0	1	0	0.0313604	0.00398107	0.00217743	0.405602	0.966805	0.865145	0.852697
Q13618	CUL3	16	53	14	26	10	100	910	9.65404	32.111	8.01869	19.4084	9.03743	0.981998	0.978862	0.98194	0.978107	0.980197	4.9011	0	0	0	0	0	0	0	0.0019219	0.00256125	0.00224722	0.405602	0.790456	0.846473	0.854772
Q14999	CUL7	12	55	18	20	7	95	468	9.39423	50.2459	17.367	18.3251	7.57599	0.981765	0.979152	0.983217	0.97712	0.978542	4.8998	0	0	0	0	0	0	0.00815739	0.0216099	0.00141982	0.000711853	0.954357	0.954357	0.811203	0.731328
P03372	ESR1	10	48	14	23	12	88	658	5.74231	33.4221	9.95216	19.0648	13.6986	0.976365	0.97892	0.982753	0.977816	0.980778	4.89663	0	0	0	0	0	0	0	0.00181048	0.00278396	0.00195411	0.405602	0.786307	0.848548	0.844398
Q9H0R8	GABARAPL1	13	33	10	19	7	72	468	10.5522	22.2996	7.41638	16.9858	7.57599	0.982288	0.978049	0.981533	0.976074	0.978542	4.89649	0	0	0	0	0	0	0	0.0237923	0.00111359	0.00111663	0.405602	0.958506	0.780083	0.795643
P19320	VCAM1	9	60	17	26	7	100	555	5.52904	52.9484	14.6853	25.0556	7.00345	0.975087	0.97921	0.983159	0.980778	0.978049	4.89628	0	0	0	0	0	0	0	0.0301975	0.00289532	0.0645657	0.405602	0.96473	0.852697	0.991701
P04629	NTRK1	21	89	24	20	11	139	1575	10.2702	57.9806	13.7368	8.10317	7.68417	0.982172	0.979268	0.983043	0.970964	0.978804	4.89425	0	0	0	0	0	0	0	0.0445458	0.0976	0.00464798	0.405602	0.983402	0.989627	0.869295
Q9UQL6	HDAC5	9	33	9	11	6	57	267	8.48392	30.4725	8.67266	10.3367	7.88567	0.981359	0.978746	0.982172	0.972822	0.979094	4.89419	0	0	0	0	0	0	0	0.000661523	0.00105791	0.0005304	0.405602	0.649378	0.771784	0.667012
Q9NRD1	FBXO6	13	46	11	11	9	72	513	10.0244	36.0683	8.05994	7.13709	10.1459	0.982114	0.979036	0.981998	0.969744	0.980546	4.89344	0	0	0	0	0	0	0	0.0212	0.00200445	0.00125621	0.405602	0.952282	0.832988	0.808091
Q92905	COPS5	11	36	9	25	7	74	652	6.69775	20.6334	5.08379	21.8181	6.46735	0.979326	0.977758	0.977642	0.980256	0.976655	4.89164	0	0	0	0	0	0	0	0.00150409	0.00200445	0.00100497	0.405602	0.775934	0.832988	0.78527
O95793	STAU1	8	32	6	16	7	57	294	6.90894	27.7182	4.85979	16.5191	9.15913	0.979617	0.978455	0.976597	0.9759	0.980314	4.89088	0	0	0	0	0	0	0	0.000724194	0.0012667	0.000725811	0.405602	0.676349	0.797718	0.736515
O95166	GABARAP	11	23	9	16	6	53	395	9.11209	13.8973	7.05764	14.3813	6.7211	0.981591	0.975668	0.981359	0.974797	0.977294	4.89071	0	0	0	0	0	0	0	0.000891315	0.000890869	0.000669979	0.405602	0.721992	0.757261	0.711618
Q7Z6Z7	HUWE1	10	38	11	14	5	66	399	7.92348	30.6419	9.2911	11.8032	5.35744	0.980952	0.978804	0.982404	0.973751	0.973577	4.88949	0	0	0	0	0	0	0	0.00224221	0.00320156	0.000963095	0.405602	0.798755	0.858921	0.778008
Q9H0W5	CCDC8	10	45	12	16	5	73	449	7.39741	37.4599	9.86542	13.4681	5.06333	0.98043	0.979094	0.982695	0.974506	0.972009	4.88873	0	0	0	0	0	0	0.00911708	0.00119074	0.00158686	0.0005304	0.970954	0.764523	0.823651	0.667012
P60520	GABARAPL2	14	30	11	18	5	67	472	11.6999	18.9871	8.46483	15.6125	4.93953	0.982404	0.977642	0.982114	0.975377	0.971196	4.88873	0	0	0	0	0	0	0.00863724	0.0227181	0.00125278	0.00125621	0.961618	0.956432	0.790456	0.808091
Q9UBS0	RPS6KB2	7	25	5	13	4	44	168	7.65142	25.4332	5.2157	15.7779	5.94018	0.980662	0.978281	0.978049	0.975494	0.975784	4.88827	0	0	0	0	0	0	0	0.000229792	0.000306236	0.0281092	0.405602	0.409751	0.518672	0.956432
Q9UBX2	DUX4	6	22	5	18	6	45	221	5.54713	18.4618	4.53882	21.8336	8.45441	0.975203	0.977526	0.975203	0.980314	0.979617	4.88786	0	0	0	0	0	0	0	0.000167122	0.000334076	0.000223326	0.405602	0.350622	0.542531	0.461618
P24941	CDK2	11	43	9	24	5	81	573	7.30712	30.3047	5.58032	21.8411	4.46297	0.980256	0.978688	0.979036	0.980372	0.967422	4.88577	0	0	0	0	0	0	0	0.00208902	0.00306236	0.000837474	0.405602	0.79668	0.854772	0.755187
P13612	ITGA4	7	43	13	25	5	79	424	4.62765	35.9639	11.4008	26.6262	5.20579	0.969106	0.978978	0.982869	0.980952	0.972822	4.88473	0	0	0	0	0	0	0	0.00160855	0.00204621	0.052474	0.405602	0.780083	0.8361	0.987552
P35228	NOS2	6	26	8	10	3	39	142	6.84186	28.9724	9.84526	12.0555	4.71237	0.979501	0.97863	0.982636	0.973926	0.969744	4.88444	0	0	0	0	0	0	0	0.000793828	0.044156	0	0.405602	0.69917	0.981328	0.0643154
Q9H492	MAP1LC3A	7	26	9	15	5	50	361	5.13307	17.9285	7.424	13.71	5.6083	0.972706	0.977352	0.981591	0.974623	0.97439	4.88066	0	0	0	0	0	0	0	0.00100273	0.000445434	0.00133996	0.405602	0.743776	0.61722	0.815353
O75147	OBSL1	7	36	12	19	5	65	418	4.67201	27.4271	10.2498	17.9447	5.24131	0.969396	0.978397	0.982811	0.976945	0.973113	4.88066	0	0	0	0	0	0	0.0071977	0.0185928	0.00104399	0.000418737	0.941909	0.93361	0.76971	0.595436
Q13573	SNW1	8	40	12	11	7	64	559	4.6158	27.3153	8.70285	6.73308	6.97945	0.968873	0.978339	0.98223	0.968815	0.977933	4.87619	0	0	0	0	0	0	0.00911708	0.00105844	0.00079343	0.0010608	0.970954	0.751037	0.746888	0.788382
P11441	UBL4A	8	17	4	17	10	47	254	7.45244	11.5899	3.20657	19.1132	15.0621	0.980488	0.973984	0.961672	0.977933	0.980836	4.87491	0	0	0	0	0	0	0	0.000271573	0.000723831	0.000725811	0.405602	0.435685	0.726141	0.736515
O60260	PRKN	6	22	10	8	6	42	337	4.35816	14.3992	8.89444	5.89351	7.19099	0.966202	0.9759	0.982288	0.967073	0.978165	4.86963	0	0	0	0	0	0	0.00863724	0.000752047	0.000501114	0.00200994	0.961618	0.687759	0.646266	0.846473
Q5S007	LRRK2	7	25	11	15	4	54	401	4.80171	15.7391	9.26634	13.0037	4.10989	0.970267	0.976771	0.982346	0.974332	0.965215	4.86893	0	0	0	0	0	0	0.00863724	0.00112807	0.00225501	0.00125621	0.961618	0.756224	0.840249	0.808091
Q504Q3	PAN2	5	33	5	21	9	62	315	3.58852	28.0075	3.68994	23.4602	12.2419	0.956156	0.978571	0.968525	0.980546	0.98072	4.86452	0	0	0	0	0	0	0	0.000355133	0.000709911	0.000711853	0.405602	0.529046	0.719917	0.731328
O95718	ESRRB	11	10	4	3	3	23	77	17.6754	10.5346	5.68244	3.94364	5.77039	0.982636	0.972764	0.979472	0.953513	0.975029	4.86341	0	0	0	0	0	0	0	9.74876e-05	0.000389755	0.000488527	0.405602	0.244813	0.584025	0.634855
O95433	AHSA1	5	19	6	10	2	35	157	5.27697	17.8254	6.67299	11.5746	3.12108	0.973751	0.977294	0.98101	0.973635	0.957578	4.86327	0	0	0	0	0	0	0.00335893	0.0162642	0.0211716	0.011554	0.870332	0.917012	0.946058	0.910788
Q14164	IKBKE	6	29	9	7	4	45	319	4.5098	22.8463	7.93231	5.07891	4.58333	0.96806	0.978107	0.981882	0.964344	0.968757	4.86115	0	0	0	0	0	0	0	0.0137504	0.000167038	0.000502485	0.405602	0.90249	0.385892	0.654564
Q00005	PPP2R2B	5	16	3	13	5	33	166	5.1378	13.5802	2.96806	15.8517	7.59462	0.972764	0.975436	0.95874	0.975552	0.97863	4.86112	0	0	0	0	0	0	0.00383877	0.00988685	0.00610726	0.00737339	0.879668	0.877593	0.877593	0.890041
Q13617	CUL2	9	23	4	16	5	48	350	7.36575	15.0698	2.59018	15.2515	5.68613	0.980314	0.976481	0.953484	0.975261	0.974681	4.86022	0	1	0	0	0	1	0.00575816	0.000501365	0.00116927	0.00033499	0.919087	0.599585	0.783195	0.526971
P19838	NFKB1	6	18	8	10	4	35	329	4.42441	10.6545	6.65939	8.13888	4.51907	0.967189	0.973026	0.980952	0.97108	0.967915	4.86016	0	0	0	0	0	0	0	0.000814718	0.000723831	0.000907264	0.405602	0.702282	0.726141	0.770747
P09651	HNRNPA1	8	26	7	12	3	47	414	5.66567	16.4144	4.84034	9.25877	2.9296	0.976074	0.976945	0.976481	0.972125	0.956562	4.85819	0	0	0	0	0	0	0	0.00201242	0.0018931	0.00166099	0.405602	0.794606	0.829876	0.8361
P32121	ARRB2	6	17	5	15	6	41	336	4.36635	9.57873	3.53913	14.1956	7.19981	0.96626	0.971661	0.965738	0.974739	0.978223	4.85662	0	0	0	0	0	0	0	0.000668486	0.00116927	0.000502485	0.405602	0.654564	0.783195	0.654564
P29353	SHC1	7	14	7	5	4	31	252	6.29566	8.66815	6.44129	3.78778	5.07763	0.978397	0.970296	0.980778	0.95151	0.972184	4.85316	0	0	0	1	0	1	0	0.000584926	0.000668151	0.0318395	0.405602	0.623444	0.702282	0.962656
Q9GZQ8	MAP1LC3B	6	23	9	8	3	41	324	4.46673	15.8287	7.8681	6.03516	3.32793	0.967828	0.976829	0.981823	0.96748	0.958827	4.85279	0	0	0	0	0	0	0.0071977	0.000835608	0.000626392	0.000837474	0.941909	0.710581	0.684647	0.755187
Q9NRC8	SIRT7	6	32	9	11	5	53	479	3.41368	20.8981	6.28393	7.46295	4.90312	0.953136	0.977816	0.980604	0.970151	0.970964	4.85267	0	0	0	0	0	0	0.00575816	0.000919169	0.000668151	0.000502485	0.919087	0.729253	0.702282	0.654564
O15264	MAPK13	3	20	4	6	2	27	90	3.90802	24.5355	5.34671	7.79996	3.83077	0.960976	0.978223	0.978368	0.970557	0.96295	4.85107	0	0	0	0	0	0	0	0.000250682	0.000334076	8.37474e-05	0.405602	0.426349	0.542531	0.26556
P00533	EGFR	16	38	18	10	4	73	882	9.86452	17.9886	12.3497	3.97014	2.54677	0.982056	0.97741	0.982927	0.953775	0.954762	4.85093	0	0	0	0	0	0	0	0.0386787	0.0826504	0.0817313	0.405602	0.979253	0.987552	0.993776
P12830	CDH1	8	27	17	8	6	56	617	4.28093	13.0274	13.8895	3.81106	5.42196	0.965505	0.975145	0.983101	0.951742	0.973868	4.84936	0	0	0	0	0	0	0.00431862	0.165699	0.271393	0.016307	0.892116	0.995851	1	0.925311
P63104	YWHAZ	7	32	11	11	5	53	610	3.52832	17.6802	7.22942	6.32723	4.31067	0.955517	0.977178	0.981417	0.96806	0.966609	4.84878	0	1	0	0	0	1	0	0.0351345	0.0737108	0.00471777	0.405602	0.973029	0.985477	0.873444
P35240	NF2	9	11	5	5	2	24	165	10.5289	7.99357	5.2607	4.81105	3.05849	0.98223	0.968293	0.978165	0.962718	0.957288	4.84869	0	0	0	0	0	0	0	0.00939535	0.0211123	0.000251242	0.405602	0.875519	0.943983	0.479253
Q6NUN9	ZNF746	6	24	4	8	2	40	210	5.6943	21.5303	3.58449	7.6342	2.75705	0.976161	0.977933	0.966783	0.970383	0.955633	4.84689	0	0	0	0	0	0	0.00383877	0.000111414	0.000334076	0	0.879668	0.279046	0.542531	0.0643154
Q86VP6	CAND1	7	32	5	21	5	61	491	4.17629	20.5636	2.68226	19.2483	4.84201	0.964344	0.9777	0.954936	0.977991	0.970557	4.84553	0	0	0	0	0	0	0.0100768	0.0201548	0.0206393	0.016537	0.981328	0.946058	0.941909	0.929461
P01106	MYC	10	44	6	12	5	64	691	5.53657	27.9652	2.5974	6.61906	4.00962	0.975145	0.978513	0.953659	0.968583	0.96446	4.84036	0	0	0	0	0	0	0.00815739	0.000828645	0.000473274	0.00118642	0.954357	0.705394	0.63278	0.80083
P25788	PSMA3	7	18	4	7	2	31	250	6.32189	12.7626	3.23779	5.86165	2.54174	0.978455	0.975029	0.962021	0.967015	0.954704	4.83722	0	0	0	0	0	0	0.00479846	0.0131834	0.010638	0.00888447	0.899378	0.900415	0.896266	0.894191
Q6P1J9	CDC73	4	26	9	7	2	40	226	3.35238	23.3122	9.37518	6.19159	2.66608	0.951916	0.978165	0.98252	0.967886	0.955168	4.83566	0	0	0	0	0	0	0.00767754	0.00100273	0.00155902	0.000669979	0.94917	0.743776	0.819502	0.711618
Q92597	NDRG1	3	12	3	6	2	22	98	3.76491	11.9391	3.8359	7.54108	3.72119	0.958566	0.974332	0.970557	0.970296	0.961847	4.8356	0	0	0	0	0	0	0	0.000188012	0.000375835	0.000125621	0.405602	0.375519	0.571577	0.34751
P15927	RPA2	5	19	9	10	2	39	342	3.39773	11.3006	7.64553	7.96464	2.16163	0.952846	0.973693	0.981707	0.97079	0.953542	4.83258	0	0	0	0	0	0	0	0.000334243	0.000222717	0.000446653	0.405602	0.504149	0.440871	0.614108
P55072	VCP	7	21	8	9	2	42	520	4.00252	9.66051	5.01958	5.22796	1.67151	0.962718	0.971719	0.977294	0.964925	0.953078	4.82973	0	0	0	0	0	0	0.141795	0.0278042	0.027585	0.0212098	0.997925	0.962656	0.958506	0.935685
Q00987	MDM2	7	20	4	8	4	36	380	4.97079	11.3852	2.43699	5.46517	4.2206	0.971661	0.973868	0.951742	0.966144	0.965738	4.82915	0	0	0	0	0	0	0.00479846	0.0139016	0.000974388	0.000418737	0.899378	0.904564	0.764523	0.595436
P13639	EEF2	4	9	3	9	4	26	167	3.96175	5.96156	2.9584	9.86538	5.95298	0.961876	0.958014	0.958449	0.972532	0.975842	4.82671	0	0	0	0	0	0	0	0.000974876	0.00139198	0.000697895	0.405602	0.736515	0.809129	0.726141
Q93034	CUL5	5	18	4	17	4	42	329	3.48736	10.6545	2.70686	17.0977	4.51907	0.954181	0.973026	0.955052	0.97619	0.967915	4.82636	0	0	0	0	0	0	0	0.000633669	0.000542873	0.000725811	0.405602	0.644191	0.65249	0.736515
P0CG48	UBC	11	33	7	9	3	51	765	5.95857	15.6323	3.00505	3.80306	1.97443	0.977758	0.976713	0.959524	0.951626	0.95331	4.81893	0	0	0	0	0	0	0	0.0027784	0.00233853	0.00322428	0.405602	0.811203	0.842324	0.863071
P28074	PSMB5	4	7	3	4	2	14	107	4.88787	5.58684	3.68878	4.60113	3.60847	0.971138	0.95482	0.968409	0.961266	0.961005	4.81664	0	0	0	0	0	0	0	0.000626706	0.000278396	0	0.405602	0.637967	0.491701	0.0643154
P38936	CDKN1A	4	13	4	8	2	24	244	3.20115	7.91601	3.28569	7.07358	2.57159	0.950348	0.967857	0.962631	0.96957	0.954965	4.80537	0	0	0	0	0	0	0	0.00030639	0.000459354	0.000614148	0.405602	0.477178	0.626556	0.696058
P07900	HSP90AA1	8	21	7	9	3	41	738	3.68896	6.89616	3.10643	3.93089	2.02816	0.957375	0.963298	0.960395	0.953368	0.953426	4.78786	0	0	0	1	1	2	0.0110365	0.0385565	0.0309119	0.0449605	0.985477	0.977178	0.96888	0.981328
Q96GG9	DCUN1D1	4	10	3	5	2	21	196	3.63693	6.2264	2.70292	4.38959	2.84288	0.956678	0.959466	0.954994	0.959292	0.956156	4.78659	0	0	0	0	0	0	0	4.17804e-05	0	0.00033499	0.405602	0.120332	0.0497925	0.526971
Q13418	ILK	8	24	8	9	1	41	211	8.15088	21.4783	8.31999	8.87122	0	0.981243	0.977875	0.982056	0.971777	0.47651	3.91295	0	0	0	0	0	0	0	0.000487438	0.000584633	0.000390821	0.405602	0.590249	0.671162	0.570539
P05362	ICAM1	1	13	5	15	5	34	147	0	10.8194	5.55066	19.9683	7.91078	0.463211	0.973403	0.978978	0.97863	0.979152	3.91016	0	0	0	0	0	0	0	0.00597053	0.000167038	0.000209369	0.405602	0.840249	0.385892	0.437759
P60033	CD81	3	18	6	15	5	42	210	2.52768	14.1437	5.82074	17.4371	6.98698	0.938821	0.975784	0.979907	0.976307	0.977991	3.90999	0	0	0	0	0	0	0	0.000139268	0.000347996	0.000418737	0.405602	0.315353	0.56639	0.595436
P06748	NPM1	8	26	4	19	8	55	472	5.20193	14.9932	2.04473	16.9139	8.98234	0.973171	0.976365	0.947503	0.976016	0.980139	3.90569	0	1	0	0	0	1	0	0.00272269	0.00212973	0.00237284	0.405602	0.809129	0.838174	0.856846
Q13616	CUL1	6	28	7	19	9	59	529	3.15674	15.6321	4.0841	15.9549	10.0151	0.949245	0.976655	0.972532	0.975668	0.980488	3.90534	0	0	0	0	0	0	0.0071977	0.000835608	0.00125278	0.000837474	0.941909	0.710581	0.790456	0.755187
Q92731	ESR2	5	23	7	15	6	50	387	3.1153	14.0942	5.05285	13.2419	6.78145	0.948432	0.975726	0.977468	0.974448	0.97741	3.90505	0	0	0	0	0	0	0	0.000487438	0.00136414	0	0.405602	0.590249	0.806017	0.0643154
Q9HCE7	SMURF1	4	19	8	12	5	37	325	2.64887	11.7068	6.70431	10.5571	5.87303	0.940708	0.9741	0.981069	0.97288	0.975668	3.90372	0	0	0	0	0	0	0	0.000633669	0.0012667	0.00108872	0.405602	0.644191	0.797718	0.791494
Q9UL18	AGO1	5	16	1	11	7	30	169	5.09321	13.4501	0	12.6835	11.0801	0.9723	0.975377	0.471603	0.974158	0.980662	3.9025	0	0	0	0	0	0	0	0.000111414	0.000222717	0.000111663	0.405602	0.279046	0.440871	0.313278
P40337	VHL	5	22	6	12	6	44	379	3.16264	13.3094	4.15626	9.72929	6.84312	0.949535	0.975319	0.972909	0.972416	0.977526	3.89817	0	0	0	0	0	0	0	0.0157906	0.000835189	0.000669979	0.405602	0.912863	0.751037	0.711618
P68104	EEF1A1	4	16	6	16	6	38	362	2.44742	8.20292	4.2818	15.0082	6.97883	0.937631	0.968815	0.973751	0.975087	0.977875	3.89553	0	1	0	0	0	1	0.0071977	0.00156677	0.00146158	0.00209369	0.941909	0.778008	0.815353	0.850622
Q99759	MAP3K3	5	19	6	3	3	29	183	4.89585	16.4891	6.22172	2.53035	4.28083	0.971196	0.977003	0.980488	0.927933	0.966289	3.89498	0	0	0	0	0	0	0	0.000487438	0.00077951	0.000586232	0.405602	0.590249	0.740664	0.685685
P04637	TP53	5	36	8	19	7	64	796	1.60759	17.7235	3.58801	12.5915	5.81067	0.928223	0.977236	0.966841	0.9741	0.975261	3.89344	1	0	0	0	0	1	0.0119962	0.00295945	0.00313196	0.00279158	0.987552	0.815353	0.856846	0.860996
P07550	ADRB2	10	16	6	3	2	26	219	10.6795	11.5999	5.69933	2.25339	2.70501	0.982346	0.974042	0.979559	0.922967	0.955401	3.89135	0	0	0	0	0	0	0.00527831	0.000229792	0.0260607	0.000460611	0.907676	0.409751	0.954357	0.622407
P30480	NA	7	22	6	3	2	32	231	6.58301	18.0253	5.5456	2.17253	2.63905	0.97921	0.977468	0.97892	0.921254	0.955081	3.89068	0	0	0	0	0	0	0	0.00714327	8.35189e-05	8.37474e-05	0.405602	0.856846	0.239627	0.26556
P60484	PTEN	6	9	7	7	3	23	210	5.6943	5.07017	7.04762	6.43358	4.04865	0.976161	0.948751	0.981301	0.968293	0.96475	3.89051	0	0	0	0	0	0	0	0.000362097	0.0318999	0.000362905	0.405602	0.532158	0.973029	0.556017
P38919	EIF4A3	2	15	4	12	5	31	219	1.61335	10.5404	3.50044	12.7298	6.87908	0.92831	0.972822	0.965505	0.974216	0.977671	3.89021	0	0	0	0	0	0	0	0.00034817	0.000278396	0.000209369	0.405602	0.522822	0.491701	0.437759
Q969P0	IGSF8	0	15	3	15	6	34	177	0	11.9547	2.86511	18.6423	9.1271	0.463211	0.974448	0.95723	0.977352	0.980256	3.88929	0	0	0	0	0	0	0	4.17804e-05	8.35189e-05	0.000111663	0.405602	0.120332	0.239627	0.313278
Q9HCK5	AGO4	5	6	0	6	3	14	62	7.67586	6.16448	0	8.95122	6.15041	0.980836	0.959117	0.471603	0.971893	0.976161	3.88801	0	0	0	0	0	0	0	5.57072e-05	0.000111359	0.00033499	0.405602	0.160788	0.288382	0.526971
P62993	GRB2	14	35	6	22	4	71	872	7.98862	15.5848	2.04892	15.1095	2.56835	0.981069	0.976597	0.947677	0.975203	0.954878	3.88775	0	0	0	0	0	0	0	0.00200546	0.0017539	0.0521979	0.405602	0.792531	0.827801	0.985477
P68431	HIST1H3A	1	16	6	6	6	28	290	0	9.66817	4.89832	4.38774	7.63839	0.463211	0.971777	0.976713	0.959233	0.978746	3.88647	0	0	0	0	0	0	0	0.000501365	0.000626392	0.000753727	0.405602	0.599585	0.684647	0.743776
Q9UKV8	AGO2	4	17	1	11	6	31	193	3.668	13.6444	0	11.9942	8.86426	0.957085	0.975552	0.471603	0.973868	0.979907	3.88641	0	0	0	0	0	0	0	0.000313353	0.000626392	0.000125621	0.405602	0.490664	0.684647	0.34751
Q49AN0	CRY2	3	18	6	7	2	27	154	3.02053	16.6771	6.73015	7.47226	3.14541	0.946516	0.97712	0.981185	0.970209	0.957753	3.88627	0	0	0	0	0	0	0.006238	9.05242e-05	0.000542873	0	0.929461	0.238589	0.65249	0.0643154
P27708	CAD	7	19	3	5	1	29	139	8.29859	18.9054	3.25621	5.2373	0	0.981301	0.977584	0.962311	0.964983	0.47651	3.88618	0	0	0	0	0	0	0	0.00100273	0.000668151	0.00184244	0.405602	0.743776	0.702282	0.840249
P33992	MCM5	2	14	4	7	4	23	191	1.76854	10.3521	3.77575	6.74842	5.66569	0.929181	0.972503	0.969919	0.968931	0.974564	3.88592	0	0	0	0	0	0	0	0.000919169	0.000306236	0.000921222	0.405602	0.729253	0.518672	0.774896
Q9Y572	RIPK3	3	12	4	2	3	17	97	3.7821	11.998	5.18664	2.41213	5.36856	0.959262	0.974506	0.977991	0.92529	0.973635	3.88539	0	0	0	0	0	0	0	0.000167122	0.000111359	0.000223326	0.405602	0.350622	0.288382	0.461618
P35244	RPA3	3	20	10	10	2	37	287	2.05089	13.7552	9.63211	8.75796	2.37313	0.931533	0.97561	0.982578	0.971719	0.953891	3.8838	0	0	0	0	0	0	0	0.000334243	0.000111359	0.00033499	0.405602	0.504149	0.288382	0.526971
O14980	XPO1	6	36	9	16	7	61	1013	1.62601	14.3474	3.47498	7.92993	5.03063	0.928397	0.975842	0.965099	0.970674	0.971951	3.88357	0	0	0	0	0	0	0.138436	0.0203745	0.0223861	0.0295329	0.995851	0.948133	0.948133	0.958506
Q13148	TARDBP	0	17	3	13	6	34	238	0	12.0698	2.39943	13.6576	8.23104	0.463211	0.974739	0.951365	0.974564	0.979413	3.88008	0	0	0	0	0	0	0	0.00117681	0.00108575	0.000907264	0.405602	0.760373	0.775934	0.770747
P34969	HTR7	4	7	1	6	2	17	67	5.89256	7.1671	0	8.70909	4.21295	0.977265	0.964431	0.471603	0.971545	0.965621	3.87886	0	0	0	0	0	0	0	0.000125341	0.000250557	0.000376863	0.405602	0.29668	0.467842	0.558091
Q9UQ35	SRRM2	2	18	3	7	4	27	180	1.83683	15.3907	2.83825	6.9466	5.79241	0.930023	0.976539	0.957085	0.96928	0.975116	3.87802	0	0	0	0	0	0	0	0.00034817	0.000417595	0.000418737	0.405602	0.522822	0.603734	0.595436
P21333	FLNA	2	19	6	6	4	34	311	1.23271	12.0601	4.70228	4.19585	4.63629	0.926713	0.974681	0.976016	0.956852	0.969222	3.87677	0	0	0	0	0	0	0.00527831	0.00122556	0.000918708	0.000921222	0.907676	0.767635	0.761411	0.774896
P23396	RPS3	2	14	3	16	5	35	249	1.47091	8.73948	2.32992	17.7411	6.55007	0.927584	0.970499	0.950348	0.976597	0.976887	3.87433	0	0	0	1	0	1	0	0.000940059	0.0389715	0.000879348	0.405602	0.733402	0.977178	0.764523
P04626	ERBB2	12	11	8	3	2	27	272	12.3433	5.6383	7.36348	1.92942	2.4385	0.982462	0.955343	0.981475	0.918206	0.954181	3.87346	0	0	0	0	0	0	0.006238	0.0140716	0.00108575	0.0304055	0.929461	0.908714	0.775934	0.960581
Q00653	NFKB2	2	7	3	12	4	23	115	2.36882	5.35172	3.56871	16.409	6.75863	0.93615	0.952149	0.966173	0.975842	0.977352	3.87152	0	0	0	0	0	0	0	4.87438e-05	9.74388e-05	0.000293116	0.405602	0.139004	0.264523	0.501037
Q04206	RELA	3	19	4	8	4	32	293	2.02014	12.5423	2.92845	6.40006	4.76089	0.931127	0.974971	0.95813	0.968118	0.970209	3.87143	0	0	0	0	0	0	0	0.000668486	0.000835189	0.000502485	0.405602	0.654564	0.751037	0.654564
P05161	ISG15	4	14	5	3	2	22	170	3.92539	11.0795	5.18617	2.64594	3.02097	0.961324	0.973577	0.977904	0.93072	0.957027	3.86983	0	0	0	0	0	0	0	0.0154314	0.000626392	0.000418737	0.405602	0.910788	0.684647	0.595436
P52272	HNRNPM	2	16	3	13	3	30	206	1.68236	12.0312	2.62444	14.5304	4.08101	0.92863	0.974564	0.953949	0.974855	0.965099	3.86847	0	0	0	0	0	0	0.00143954	0.000250682	0.000125278	0.000125621	0.827801	0.426349	0.322614	0.34751
O60216	RAD21	2	17	3	14	3	31	216	1.62885	12.7931	2.55012	15.7211	4.00131	0.928455	0.975087	0.953136	0.975436	0.964344	3.868	0	0	0	0	0	0	0	0.000111414	0.000222717	5.58316e-05	0.405602	0.279046	0.440871	0.219917
P35579	MYH9	3	15	6	6	4	31	323	1.87685	8.07018	4.59675	4.09268	4.55738	0.93043	0.968409	0.975494	0.955401	0.968525	3.86783	0	0	0	0	0	0	0.00383877	0.0205097	0.0179492	0.0270763	0.879668	0.950207	0.93361	0.954357
O60739	EIF1B	0	14	5	4	2	22	142	0	12.2249	5.63799	4.01383	3.24797	0.463211	0.974913	0.979152	0.95453	0.958304	3.8669	0	0	0	0	0	0	0	4.17804e-05	0	2.79158e-05	0.405602	0.120332	0.0497925	0.161826
P63220	RPS21	0	7	3	14	2	24	102	0	5.74416	3.7688	20.7514	3.66982	0.463211	0.956272	0.969861	0.979268	0.961295	3.8667	0	0	0	0	0	0	0	5.57072e-05	0.000167038	0.000223326	0.405602	0.160788	0.385892	0.461618
Q08211	DHX9	0	12	3	7	4	22	201	0	8.00266	2.66313	6.57869	5.5569	0.463211	0.968351	0.954355	0.968467	0.974274	3.86545	0	1	0	0	0	1	0.00287908	0.000835608	0.000417595	0.000418737	0.865145	0.710581	0.603734	0.595436
O96017	CHEK2	2	9	4	4	2	14	113	2.39016	7.5552	4.86271	4.48687	3.53866	0.936498	0.966463	0.976655	0.960134	0.960569	3.86382	0	0	0	0	0	0	0	5.57072e-05	0	2.79158e-05	0.405602	0.160788	0.0497925	0.161826
Q8TF42	UBASH3B	1	9	3	6	2	17	114	0	7.51832	3.58322	7.08505	3.5274	0.463211	0.966202	0.966667	0.969628	0.960308	3.8628	0	0	0	0	0	0	0	0.00030639	0.000153118	0.0261411	0.405602	0.477178	0.365145	0.952282
P27348	YWHAQ	6	19	6	7	1	34	415	3.79289	9.79053	3.91032	4.26008	0	0.95935	0.971893	0.971487	0.957956	0.47651	3.86069	0	1	0	0	0	1	0	0.00167122	0.0456735	0.00167495	0.405602	0.782158	0.983402	0.838174
P46940	IQGAP1	5	16	5	4	2	29	270	3.95177	10.1521	4.05511	2.74042	2.44751	0.961498	0.972358	0.972358	0.931998	0.954297	3.86051	0	0	0	0	0	0	0	0.0181661	0.0012667	0.00163307	0.405602	0.929461	0.797718	0.83195
P50750	CDK9	3	15	3	4	3	21	149	3.07392	13.1273	3.14289	3.91536	4.63017	0.947503	0.975261	0.960743	0.953194	0.969135	3.85833	0	0	0	0	0	0	0	0.000167122	0	0	0.405602	0.350622	0.0497925	0.0643154
P78371	CCT2	6	14	2	6	3	26	286	4.81434	7.92292	1.36622	4.42606	3.53339	0.970383	0.967944	0.944135	0.959466	0.960453	3.85825	0	0	0	0	0	0	0	0.00171996	0.000723831	0.00145162	0.405602	0.784232	0.726141	0.819502
P17987	TCP1	6	11	1	6	2	22	219	5.57329	6.63524	0	5.1747	2.70501	0.975319	0.962253	0.471603	0.96475	0.955401	3.85772	0	0	0	0	0	0	0.00671785	0.018747	0.0156003	0.0244486	0.935685	0.935685	0.921162	0.950207
Q15022	SUZ12	3	21	3	5	4	30	237	2.34044	16.5876	2.40594	3.93313	5.20723	0.935482	0.977062	0.951452	0.953426	0.97288	3.85482	0	0	0	0	0	0	0.00383877	0.000167122	0.000445434	0	0.879668	0.350622	0.61722	0.0643154
P40227	CCT6A	9	10	2	5	2	23	206	9.57756	6.0125	1.73031	4.26909	2.78094	0.98194	0.958275	0.945703	0.958014	0.955836	3.85407	0	1	0	0	0	1	0	0.00104451	0.000695991	0.000977053	0.405602	0.748963	0.716805	0.78112
P63244	RACK1	1	11	3	11	3	26	217	0	6.67831	2.5429	11.3911	3.99356	0.463211	0.962485	0.95302	0.973519	0.964228	3.85325	0	0	0	0	0	0	0.00575816	0.0189977	0.244557	0.0150926	0.919087	0.937759	0.997925	0.917012
Q05655	PRKCD	1	8	4	5	2	16	147	0	5.49538	4.31243	5.09752	3.20418	0.463211	0.953542	0.9741	0.964402	0.958101	3.85015	0	0	0	0	0	0	0	0.000292463	0.000389755	0.000488527	0.405602	0.46473	0.584025	0.634855
P17252	PRKCA	4	11	5	6	2	23	247	3.17716	6.07681	4.26895	4.83452	2.55657	0.949768	0.958653	0.973693	0.962892	0.95482	3.85006	0	0	0	0	0	0	0.00239923	0.143892	0.238491	0.365215	0.855809	0.987552	0.993776	0.995851
P11021	HSPA5	8	19	5	6	3	33	542	4.72169	7.79781	2.46881	2.74547	2.50176	0.969744	0.967538	0.952149	0.932056	0.95453	3.84396	0	0	0	0	0	0	0.0105566	0.0338593	0.040819	0.0440812	0.983402	0.96888	0.979253	0.977178
P67809	YBX1	4	16	4	7	2	27	328	2.63155	8.84749	2.71263	4.99094	2.21176	0.940476	0.970674	0.955343	0.963995	0.9536	3.84361	0	1	0	1	1	3	0	0.000835608	0.000556793	0.000697895	0.405602	0.710581	0.660788	0.726141
Q13043	STK4	4	11	3	3	2	19	177	3.84321	7.65133	2.86511	2.58251	2.97034	0.960221	0.966841	0.95723	0.929413	0.956882	3.84117	0	0	0	0	0	0	0.006238	0.000452621	0.000723831	0.000181453	0.929461	0.582988	0.726141	0.412863
O43918	AIRE	3	7	2	3	0	13	85	4.00454	6.35248	2.79321	3.77701	0	0.962776	0.960685	0.956504	0.950813	0.47651	3.83078	0	0	0	0	0	0	0.00287908	4.17804e-05	0	0.000167495	0.865145	0.120332	0.0497925	0.400415
P13569	CFTR	9	18	6	3	1	27	225	9.20329	13.5934	5.62135	2.21234	0	0.981649	0.975494	0.979094	0.922184	0.47651	2.93624	0	0	0	0	0	0	0	0.0431786	0.00341036	0.00205181	0.405602	0.981328	0.863071	0.848548
Q96FW1	OTUB1	13	19	7	3	1	37	322	12.7422	11.781	5.64071	1.68633	0	0.98252	0.974158	0.97921	0.916086	0.47651	2.93589	0	0	0	0	0	0	0	0.0184197	0.00155902	0	0.405602	0.931535	0.819502	0.0643154
Q9BXB1	LGR4	6	14	8	2	1	25	162	6.45172	11.3837	9.33345	1.80275	0	0.978862	0.97381	0.982462	0.917189	0.47651	2.93513	0	0	0	0	0	0	0.00143954	4.17804e-05	0	4.18737e-05	0.827801	0.120332	0.0497925	0.196058
P08865	RPSA	1	14	2	19	7	36	175	0	10.8974	1.91853	25.5833	10.958	0.463211	0.973461	0.946719	0.980836	0.980604	2.9349	0	0	0	0	0	0	0	0.000995766	0.000904788	0.000544358	0.405602	0.738589	0.759336	0.670124
Q15843	NEDD8	2	20	2	15	7	39	253	1.45347	14.8513	1.49973	16.1399	9.6766	0.927439	0.97619	0.944686	0.975784	0.980372	2.93235	0	0	0	0	0	0	0	0.00038995	0.000445434	0.00033499	0.405602	0.553942	0.61722	0.526971
P46776	RPL27A	0	14	0	15	4	32	124	0	13.1046	0	21.1999	6.59505	0.463211	0.975203	0.471603	0.979617	0.977091	2.93191	0	0	0	0	0	0	0	8.35608e-05	0.000111359	0.000111663	0.405602	0.223029	0.288382	0.313278
P62847	RPS24	1	11	0	17	5	30	128	0	9.25903	0	24.6315	8.2724	0.463211	0.971254	0.471603	0.980662	0.979501	2.93142	0	0	0	0	0	0	0	6.9634e-05	5.56793e-05	8.37474e-05	0.405602	0.19917	0.18361	0.26556
Q8TCJ0	FBXO25	7	13	5	4	1	26	170	7.61127	9.96569	5.18617	3.64784	0	0.980604	0.972184	0.977904	0.948606	0.47651	2.93069	0	0	0	0	0	0	0	0.000557072	0.000668151	0.00111663	0.405602	0.616183	0.702282	0.795643
P62266	RPS23	0	11	0	16	5	28	136	0	8.95307	0	22.3106	8.11378	0.463211	0.970877	0.471603	0.98043	0.979268	2.93057	0	0	0	0	0	0	0	0.000292463	0.000167038	0.00033499	0.405602	0.46473	0.385892	0.526971
P62750	RPL23A	1	13	1	17	6	32	197	0	9.11665	0	21.1273	8.80208	0.463211	0.97108	0.471603	0.979559	0.979849	2.93049	0	0	0	0	0	0	0	0.000522255	0.000208797	0.000348948	0.405602	0.605809	0.420124	0.551867
P46778	RPL21	1	14	0	15	4	32	143	0	12.1797	0	20.1669	6.28673	0.463211	0.974855	0.471603	0.978804	0.976336	2.92999	0	0	0	0	0	0	0	0.000222829	0.000278396	0.000279158	0.405602	0.40249	0.491701	0.492739
P15880	RPS2	1	14	0	17	6	33	238	0	9.00979	0	19.6256	8.23104	0.463211	0.971022	0.471603	0.978397	0.979413	2.92883	0	0	0	0	0	0	0	0.000543145	0.000584633	0.000502485	0.405602	0.610996	0.671162	0.654564
P05388	RPLP0	2	14	1	17	4	35	191	1.76854	10.3521	0	21.3749	5.66569	0.929181	0.972503	0.471603	0.979907	0.974564	2.92697	0	0	0	0	0	0	0.00383877	0.000724194	0.00077951	0.000446653	0.879668	0.676349	0.740664	0.614108
P62241	RPS8	1	14	2	16	5	33	219	0	9.51243	1.66083	18.6948	6.87908	0.463211	0.971487	0.945296	0.977468	0.977671	2.92663	0	0	0	1	0	1	0	0.000438694	0.000389755	0.000586232	0.405602	0.574689	0.584025	0.685685
Q99558	MAP3K14	1	12	1	13	4	26	125	0	10.5652	0	17.619	6.57764	0.463211	0.97288	0.471603	0.976394	0.977003	2.92628	0	0	0	0	0	0	0	8.35608e-05	0.000250557	0.000251242	0.405602	0.223029	0.467842	0.479253
P62753	RPS6	1	12	0	16	5	31	189	0	8.32544	0	19.7996	7.25863	0.463211	0.969338	0.471603	0.978513	0.978281	2.92613	0	0	0	0	0	0	0	0.000724194	0.000556793	0.000669979	0.405602	0.676349	0.660788	0.711618
P62701	RPS4X	2	11	0	19	6	33	189	1.78062	7.3347	0	24.8894	8.9278	0.929472	0.965273	0.471603	0.98072	0.980023	2.92602	0	0	0	0	0	0	0	0.000877388	0.000876949	0.000753727	0.405602	0.71888	0.755187	0.743776
P18621	RPL17	0	10	0	13	5	25	121	0	8.38519	0	17.8241	8.41985	0.463211	0.96957	0.471603	0.976829	0.979559	2.92596	0	0	0	1	0	1	0	0.000174085	0.000278396	0.000348948	0.405602	0.368257	0.491701	0.551867
P33527	ABCC1	4	6	3	1	0	11	38	7.14993	7.68465	5.47353	0	0	0.979994	0.967015	0.978688	0.456852	0.47651	2.9257	0	0	0	0	0	0	0	2.08902e-05	4.17595e-05	0	0.405602	0.0767635	0.156639	0.0643154
P18124	RPL7	2	11	0	17	5	32	186	1.79901	7.41164	0	21.5877	7.29998	0.929646	0.965796	0.471603	0.980139	0.978339	2.92427	0	0	0	1	0	1	0	0.000445658	0.00077951	0.000446653	0.405602	0.579876	0.740664	0.614108
P61247	RPS3A	1	12	1	17	5	33	212	0	7.72569	0	20.5421	6.9626	0.463211	0.967247	0.471603	0.979094	0.977816	2.92416	0	0	0	1	0	1	0	0.000668486	0.000668151	0.000669979	0.405602	0.654564	0.702282	0.711618
P46777	RPL5	1	11	0	16	6	31	192	0	7.25915	0	19.681	8.88002	0.463211	0.964692	0.471603	0.978455	0.979965	2.92311	0	0	0	0	0	0	0	0.000724194	0.000668151	0.000558316	0.405602	0.676349	0.702282	0.675311
Q5TC82	RC3H1	3	16	2	14	3	32	144	3.12932	14.6234	2.14869	18.4039	4.68846	0.948926	0.976074	0.948548	0.977178	0.96957	2.92282	0	0	0	0	0	0	0	2.78536e-05	0.000111359	5.58316e-05	0.405602	0.0892116	0.288382	0.219917
Q02878	RPL6	1	12	1	16	5	30	218	0	7.58152	0	18.729	6.89084	0.463211	0.966551	0.471603	0.977584	0.977758	2.92189	0	0	0	0	0	0	0	0.000682413	0.000487194	0.000293116	0.405602	0.661826	0.637967	0.501037
P61313	RPL15	1	13	0	16	3	32	157	0	10.4309	0	21.2072	4.541	0.463211	0.972677	0.471603	0.979704	0.968264	2.92064	0	0	0	0	0	0	0	0.000334243	0.000389755	0.000111663	0.405602	0.504149	0.584025	0.313278
P25398	RPS12	0	8	1	16	4	26	109	0	6.59009	0	24.0377	6.87522	0.463211	0.962108	0.471603	0.980604	0.977584	2.9203	0	0	0	0	0	0	0	8.35608e-05	0.000125278	0.000125621	0.405602	0.223029	0.322614	0.34751
Q9BV73	CEP250	1	11	1	15	6	30	201	0	7.04043	0	17.7446	8.74119	0.463211	0.963821	0.471603	0.976655	0.979733	2.92021	0	0	0	0	0	0	0	0.000146231	0.000389755	0.000488527	0.405602	0.330913	0.584025	0.634855
Q12905	ILF2	1	13	0	11	5	27	227	0	8.31685	0	11.1607	6.78697	0.463211	0.96928	0.471603	0.973345	0.977468	2.92009	0	0	0	0	0	0	0.00191939	0.000334243	0.000222717	0.000167495	0.842324	0.504149	0.440871	0.400415
P62906	RPL10A	1	9	0	16	5	29	151	0	6.36405	0	21.5054	7.84083	0.463211	0.96083	0.471603	0.980081	0.978978	2.91989	0	0	0	1	0	1	0	0.000382987	0.000417595	0.000279158	0.405602	0.545643	0.603734	0.492739
P84098	RPL19	1	11	0	14	3	28	130	0	9.18056	0	19.0932	4.86359	0.463211	0.971138	0.471603	0.977875	0.970674	2.91969	0	0	0	0	0	0	0	0.000188012	0.000250557	0.000125621	0.405602	0.375519	0.467842	0.34751
Q7L2J0	MEPCE	1	16	2	9	3	25	139	0	14.8856	2.19095	10.6573	4.7489	0.463211	0.976307	0.948955	0.973142	0.970151	2.9196	0	0	0	0	0	0	0	0.000417804	0.000417595	0	0.405602	0.565353	0.603734	0.0643154
P62280	RPS11	0	10	0	16	4	27	160	0	7.11663	0	21.0627	6.04491	0.463211	0.964053	0.471603	0.979413	0.975958	2.91943	0	0	0	0	0	0	0	0.000278536	0.000139198	0.000418737	0.405602	0.448133	0.349585	0.595436
P11498	PC	6	6	3	1	0	13	60	9.47715	6.26357	4.67267	0	0	0.981882	0.959872	0.975784	0.456852	0.47651	2.91754	0	0	0	0	0	0	0	4.17804e-05	0.000111359	5.58316e-05	0.405602	0.120332	0.288382	0.219917
P62277	RPS13	1	11	0	16	4	31	195	0	7.18495	0	19.5643	5.62147	0.463211	0.964518	0.471603	0.978281	0.974448	2.91725	0	0	0	0	0	0	0	0.000376024	0.000417595	0.000418737	0.405602	0.538382	0.603734	0.595436
Q9Y3U8	RPL36	0	9	0	16	3	26	121	0	7.26996	0	23.2183	4.98683	0.463211	0.964779	0.471603	0.980488	0.971719	2.91699	0	1	0	0	0	1	0	6.9634e-05	2.78396e-05	6.97895e-05	0.405602	0.19917	0.131743	0.238589
P62081	RPS7	1	9	1	15	5	27	155	0	6.25897	0	19.5881	7.77278	0.463211	0.959785	0.471603	0.978339	0.978862	2.91699	0	0	0	1	0	1	0	0.000459584	0.000334076	0.00033499	0.405602	0.585062	0.542531	0.526971
Q13233	MAP3K1	3	12	2	10	4	27	191	2.67655	8.27004	1.81703	10.6455	5.66569	0.941115	0.96899	0.946167	0.973055	0.974564	2.91661	0	0	0	0	0	0	0	0.000278536	0.000278396	0.000558316	0.405602	0.448133	0.491701	0.675311
P62424	RPL7A	1	10	0	16	3	28	152	0	7.34594	0	21.4548	4.59616	0.463211	0.965331	0.471603	0.980023	0.968931	2.91429	0	0	0	0	1	1	0	0.000668486	0.000556793	0.00033499	0.405602	0.654564	0.660788	0.526971
P60709	ACTB	5	27	2	15	4	48	455	2.75428	16.3743	0.895401	12.1625	3.8515	0.94216	0.976887	0.943206	0.973984	0.96324	2.91411	0	0	0	1	0	1	0.00959693	0.184383	0.0301045	0.0448349	0.978216	1	0.96473	0.979253
P42677	RPS27	1	8	0	14	5	27	135	0	5.80237	0	18.8382	8.13307	0.463211	0.956911	0.471603	0.977642	0.979326	2.91388	0	0	0	0	0	0	0	0.000167122	0.000167038	0.000251242	0.405602	0.350622	0.385892	0.479253
P32969	RPL9	1	9	0	15	4	27	157	0	6.2076	0	19.4964	6.08559	0.463211	0.95935	0.471603	0.978165	0.976074	2.91359	0	0	0	0	0	0	0	0.000146231	0.000125278	0.000125621	0.405602	0.330913	0.322614	0.34751
Q16526	CRY1	2	20	4	4	1	25	120	2.3172	21.7054	4.73608	4.36155	0	0.935221	0.977991	0.976132	0.958798	0.47651	2.91292	0	0	0	0	0	0	0	0.000111414	0.000334076	0.000111663	0.405602	0.279046	0.542531	0.313278
P60866	RPS20	0	8	0	15	5	25	143	0	5.59441	0	20.1669	7.98272	0.463211	0.954907	0.471603	0.978804	0.97921	2.91292	0	0	0	1	0	1	0	0.000250682	0.000334076	0.000418737	0.405602	0.426349	0.542531	0.595436
Q16659	MAPK6	6	22	5	2	1	30	320	4.50112	14.8855	3.65302	1.06588	0	0.968002	0.976249	0.967828	0.913879	0.47651	2.91208	0	0	0	0	0	0	0	0.000557072	0.000668151	0.000446653	0.405602	0.616183	0.702282	0.614108
P61353	RPL27	2	9	0	13	3	25	125	2.26789	7.13522	0	17.619	4.93092	0.934321	0.96417	0.471603	0.976394	0.971138	2.9117	0	0	0	0	0	0	0	2.78536e-05	4.17595e-05	2.79158e-05	0.405602	0.0892116	0.156639	0.161826
P26373	RPL13	1	12	0	15	3	30	192	0	8.24259	0	18.0671	4.19967	0.463211	0.968873	0.471603	0.977062	0.965505	2.91144	0	0	0	0	0	0	0	0.000382987	0.000417595	0.000418737	0.405602	0.545643	0.603734	0.595436
Q9NZJ7	MTCH1	4	5	3	0	0	8	49	6.58045	5.56493	5.02514	0	0	0.979152	0.954617	0.977352	0.456852	0.47651	2.91112	0	0	0	0	0	0	0	2.78536e-05	0	5.58316e-05	0.405602	0.0892116	0.0497925	0.219917
P62244	RPS15A	0	8	0	16	5	26	153	0	5.35254	0	21.4046	7.80658	0.463211	0.952236	0.471603	0.979965	0.97892	2.91112	0	0	0	0	0	0	0	0.000208902	0.000334076	0.000586232	0.405602	0.390041	0.542531	0.685685
P62249	RPS16	1	10	0	17	7	30	241	0	5.35027	0	19.5267	9.84461	0.463211	0.952091	0.471603	0.978223	0.98043	2.91074	0	0	0	0	0	0	0	0.000487438	0.000292316	0.000683937	0.405602	0.590249	0.509336	0.721992
P62851	RPS25	1	8	0	15	4	26	142	0	5.61966	0	20.2175	6.30187	0.463211	0.955139	0.471603	0.97892	0.976481	2.91054	0	0	0	0	0	0	0	0.000292463	0.000417595	0.000586232	0.405602	0.46473	0.603734	0.685685
P30050	RPL12	2	8	0	15	4	27	143	2.10677	5.59441	0	20.1669	6.28673	0.932172	0.954907	0.471603	0.978804	0.976336	2.91005	0	0	0	0	0	0	0	0.000313353	0.000278396	0.000418737	0.405602	0.490664	0.491701	0.595436
Q9NZC7	WWOX	8	15	4	3	1	26	287	6.99803	8.80495	2.96841	1.85115	0	0.979733	0.970616	0.958856	0.917364	0.47651	2.9092	0	0	0	0	0	0	0	0.00818179	0.000194878	0	0.405602	0.863071	0.409751	0.0643154
Q15051	IQCB1	9	11	2	3	3	23	215	9.39587	6.72185	1.68169	2.28149	4.00911	0.981823	0.962718	0.945412	0.923345	0.964402	2.90894	0	0	0	0	0	0	0	0.000104451	0	0.000837474	0.405602	0.260373	0.0497925	0.755187
P07437	TUBB	4	16	2	7	4	27	284	2.90586	9.80919	1.37377	5.44953	4.82625	0.944541	0.971951	0.944251	0.966028	0.97047	2.90845	0	0	0	0	0	0	0.00815739	0.00236756	0.00283964	0.0553069	0.954357	0.80083	0.850622	0.989627
Q92598	HSPH1	4	5	3	1	2	10	91	5.23214	4.0081	3.96068	0	3.81653	0.973635	0.929501	0.971951	0.456852	0.962718	2.9083	0	0	0	0	0	0	0.00143954	0.149984	0.0145389	0.0105108	0.827801	0.991701	0.910788	0.900415
P43686	PSMC4	4	8	4	2	1	14	114	4.75418	6.42305	4.84412	2.21656	0	0.969861	0.961498	0.976539	0.922329	0.47651	2.9079	0	0	0	0	0	0	0.00383877	0.00608987	0.00652131	0.00441432	0.879668	0.842324	0.881743	0.86722
Q13813	SPTAN1	2	8	5	5	3	17	166	1.93093	5.06417	5.2456	4.79615	4.44617	0.930691	0.948635	0.978107	0.962602	0.967131	2.90784	0	0	0	0	0	0	0	0.000905242	0.00108575	0.00108872	0.405602	0.725104	0.775934	0.791494
Q9UJV9	DDX41	1	9	1	4	3	12	92	0	8.42742	0	4.91987	5.46037	0.463211	0.969744	0.471603	0.963182	0.973926	2.90685	0	0	0	0	0	0	0	1.39268e-05	1.39198e-05	1.39579e-05	0.405602	0.0612033	0.107884	0.133817
Q9C0C7	AMBRA1	1	8	4	2	2	13	90	0	7.31427	5.34671	2.50382	3.83077	0.463211	0.965157	0.978368	0.927439	0.96295	2.90648	0	0	0	0	0	0	0	0.000167122	0	0.000111663	0.405602	0.350622	0.0497925	0.313278
Q9UHB6	LIMA1	2	14	8	1	2	25	254	1.44916	8.62114	7.61958	0	2.52226	0.927352	0.970151	0.981649	0.456852	0.954646	2.90645	0	0	0	0	0	0	0.00383877	0.0121051	0.0154576	0.0113064	0.879668	0.887967	0.919087	0.908714
P11310	ACADM	5	5	2	1	0	9	44	8.59904	5.84732	3.63182	0	0	0.981417	0.957259	0.967567	0.456852	0.47651	2.90624	0	0	0	0	0	0	0	5.57072e-05	0.000111359	0	0.405602	0.160788	0.288382	0.0643154
O00716	E2F3	5	8	3	3	0	16	114	6.08698	6.42305	3.58322	3.28939	0	0.977991	0.961498	0.966667	0.942944	0.47651	2.90616	0	0	0	0	0	0	0	5.57072e-05	0.000111359	0	0.405602	0.160788	0.288382	0.0643154
P09874	PARP1	1	14	4	8	1	23	225	0	9.34846	3.4465	7.37556	0	0.463211	0.971312	0.964808	0.970035	0.47651	2.90616	0	1	0	0	0	1	0	0.000682413	0.000389755	0.000390821	0.405602	0.661826	0.584025	0.570539
P62899	RPL31	1	8	0	15	3	26	136	0	5.77561	0	20.5292	4.78625	0.463211	0.956504	0.471603	0.979036	0.970267	2.90581	0	0	0	0	0	0	0	0.000139268	0.000139198	0.000139579	0.405602	0.315353	0.349585	0.375519
P37840	SNCA	0	5	4	5	4	16	187	0	2.3687	3.81867	4.50397	5.71087	0.463211	0.869599	0.970151	0.960395	0.974797	2.90534	0	0	0	0	0	0	0	0.000208902	0.000250557	0.0168968	0.405602	0.390041	0.467842	0.931535
P35558	PCK1	2	10	3	3	1	15	67	3.03949	11.2206	4.48233	4.18005	0	0.947038	0.973635	0.974913	0.956765	0.47651	2.90531	0	0	0	0	0	0	0	4.87438e-05	0.000292316	9.77053e-05	0.405602	0.139004	0.509336	0.289419
P05198	EIF2S1	1	11	0	3	3	15	75	0	12.0585	0	3.98819	5.81639	0.463211	0.974623	0.471603	0.95392	0.975319	2.90386	0	1	0	0	0	1	0	0.000174085	0.000139198	0.000209369	0.405602	0.368257	0.349585	0.437759
P61513	RPL37A	1	8	0	14	4	26	158	0	5.23837	0	17.7832	6.07194	0.463211	0.950407	0.471603	0.976713	0.976016	2.90314	0	0	0	0	0	0	0	4.17804e-05	8.35189e-05	5.58316e-05	0.405602	0.120332	0.239627	0.219917
P57078	NA	6	13	4	4	1	22	249	5.20584	7.80427	3.24568	2.89523	0	0.973229	0.967596	0.962079	0.934901	0.47651	2.9029	0	0	0	0	0	0	0	0.000278536	0.000334076	0.000111663	0.405602	0.448133	0.542531	0.313278
Q13155	AIMP2	5	9	2	3	0	16	95	6.55622	8.28984	2.65492	3.59094	0	0.979036	0.969077	0.954239	0.9473	0.47651	2.90235	0	1	0	0	0	1	0	0.000188012	4.17595e-05	8.37474e-05	0.405602	0.375519	0.156639	0.26556
Q6PKG0	LARP1	0	10	0	7	2	16	114	0	8.6618	0	8.50277	3.5274	0.463211	0.970209	0.471603	0.971312	0.960308	2.90183	0	0	0	0	0	0	0	0.000125341	0.000208797	0.000125621	0.405602	0.29668	0.420124	0.34751
P43351	RAD52	1	7	0	3	2	12	47	0	8.42462	0	4.79228	4.67698	0.463211	0.969657	0.471603	0.962544	0.969483	2.90168	0	0	0	0	0	0	0	0.000139268	0.000139198	0.000139579	0.405602	0.315353	0.349585	0.375519
Q9BUN8	DERL1	5	8	3	0	0	12	122	5.91383	6.17234	3.47079	0	0	0.977352	0.959175	0.965041	0.456852	0.47651	2.90157	0	0	0	0	0	0	0.00143954	0.0039641	0.00576964	0.0058556	0.827801	0.825726	0.875519	0.883817
P31947	SFN	2	13	2	10	3	28	253	1.45347	7.71674	1.49973	9.33604	3.73686	0.927439	0.967131	0.944686	0.972184	0.961963	2.90128	0	0	0	0	0	0	0	0.00034817	0.000626392	0.000139579	0.405602	0.522822	0.684647	0.375519
Q9H3D4	TP63	4	8	3	2	0	13	109	4.84874	6.59009	3.65788	2.27057	0	0.970906	0.962108	0.967944	0.923229	0.47651	2.90096	0	0	0	0	0	0	0	0.000139268	6.95991e-05	6.97895e-05	0.405602	0.315353	0.208506	0.238589
P19438	TNFRSF1A	5	11	4	2	1	18	204	4.62861	6.97003	3.64276	1.542	0	0.969164	0.963589	0.96777	0.915447	0.47651	2.90052	0	0	0	0	0	0	0	0.010406	0.000695991	0.0231086	0.405602	0.879668	0.716805	0.943983
P07814	EPRS	1	11	3	2	2	16	111	0	9.98742	3.62758	2.24865	3.5615	0.463211	0.972242	0.967364	0.922851	0.96083	2.90044	0	1	1	0	0	2	0	0.000633669	0.000292316	0.000390821	0.405602	0.644191	0.509336	0.570539
P62314	SNRPD1	1	14	1	4	2	18	99	0	14.5989	0	4.76469	3.70815	0.463211	0.976016	0.471603	0.962485	0.961702	2.9002	0	0	0	0	0	0	0	0.000208902	0.000125278	0.000125621	0.405602	0.390041	0.322614	0.34751
P12544	GZMA	0	3	2	3	1	5	14	0	5.40501	5.16779	7.00853	0	0.463211	0.952555	0.977816	0.969512	0.47651	2.89988	0	0	0	0	0	0	0	3.4817e-05	0	0	0.405602	0.102697	0.0497925	0.0643154
P23258	TUBG1	4	8	2	11	4	26	222	3.38782	4.06988	1.64548	11.2745	5.3457	0.952787	0.930778	0.945209	0.973403	0.973461	2.89965	0	0	0	0	0	0	0	0.000752047	0.000835189	0.0341984	0.405602	0.687759	0.751037	0.966805
P27635	RPL10	2	11	1	16	4	30	284	1.32861	5.4447	0	16.7725	4.82625	0.926945	0.953078	0.471603	0.975958	0.97047	2.89951	0	1	0	0	0	1	0	0.000146231	0.000250557	0.000209369	0.405602	0.330913	0.467842	0.437759
O75533	SF3B1	1	11	3	5	1	17	136	0	8.95307	3.29194	5.29197	0	0.463211	0.970877	0.962747	0.965244	0.47651	2.89887	0	1	0	0	1	2	0	6.9634e-05	2.78396e-05	0	0.405602	0.19917	0.131743	0.0643154
P34947	GRK5	1	10	3	3	3	16	141	0	7.68473	3.23285	2.94385	4.72446	0.463211	0.967073	0.961934	0.936208	0.969803	2.89881	0	0	0	0	0	0	0	0.000146231	0.000292316	0.000195411	0.405602	0.330913	0.509336	0.419087
P19338	NCL	2	11	2	10	3	26	222	1.5981	6.5715	1.64548	9.94149	3.95533	0.928107	0.961905	0.945209	0.97259	0.964053	2.89855	0	0	0	0	0	0	0	0.000779901	0.000487194	0.000488527	0.405602	0.695021	0.637967	0.634855
P04843	RPN1	4	11	3	3	0	18	141	4.3101	8.77197	3.23285	2.94385	0	0.965621	0.970557	0.961934	0.936208	0.47651	2.89811	1	0	0	0	0	1	0	0.000584926	0.000292316	0.000488527	0.405602	0.623444	0.509336	0.634855
O60684	KPNA6	0	6	3	3	0	8	57	0	6.41934	4.76155	4.45747	0	0.463211	0.961324	0.976307	0.960046	0.47651	2.89768	0	0	0	0	0	0	0	0.000104451	8.35189e-05	0	0.405602	0.260373	0.239627	0.0643154
P67936	TPM4	3	6	4	1	0	10	77	4.17228	5.51921	5.68244	0	0	0.964228	0.953659	0.979472	0.456852	0.47651	2.89736	0	0	0	0	0	0	0	8.35608e-05	0.000125278	4.18737e-05	0.405602	0.223029	0.322614	0.196058
P31948	STIP1	4	8	4	3	3	16	181	3.79783	4.76257	3.88497	2.54752	4.29943	0.959408	0.944367	0.971138	0.928397	0.966551	2.8971	0	0	0	0	0	0	0.00287908	0.160501	0.0163485	0.021109	0.865145	0.993776	0.925311	0.93361
Q92858	ATOH1	3	3	2	0	2	9	63	4.51597	2.76435	3.1707	0	4.29314	0.968264	0.888792	0.961179	0.456852	0.966463	2.89591	0	0	0	0	0	0	0	6.9634e-06	0	2.79158e-05	0.405602	0.0446058	0.0497925	0.161826
Q9UQ80	PA2G4	0	8	1	7	2	15	107	0	6.65935	0	8.72268	3.60847	0.463211	0.962427	0.471603	0.971603	0.961005	2.89503	0	0	0	0	0	0	0	0.00030639	0.000222717	0.000167495	0.405602	0.477178	0.440871	0.400415
Q13509	TUBB3	6	16	3	4	2	26	300	4.6806	9.44052	2.04824	2.54197	2.31939	0.969454	0.971429	0.94759	0.928107	0.953775	2.89466	0	0	0	0	0	0	0	0.000724194	0.00144766	0.00163307	0.405602	0.676349	0.813278	0.83195
Q96BE0	NA	2	8	5	1	2	12	137	2.15786	5.74908	5.72868	0	3.29341	0.933014	0.956359	0.979675	0.456852	0.958595	2.89463	0	0	0	0	0	0	0	0.000208902	6.95991e-05	0.000279158	0.405602	0.390041	0.208506	0.492739
Q07020	RPL18	1	9	1	15	3	28	199	0	5.27629	0	17.8149	4.13925	0.463211	0.951103	0.471603	0.976771	0.965331	2.89321	0	0	0	1	0	1	0	0.000229792	0.000167038	0.000167495	0.405602	0.409751	0.385892	0.400415
P43243	MATR3	1	12	1	5	2	17	156	0	9.34987	0	4.9498	3.12913	0.463211	0.97137	0.471603	0.963676	0.957666	2.89271	0	0	0	0	0	0	0.00143954	0.000208902	8.35189e-05	0.000209369	0.827801	0.390041	0.239627	0.437759
P48681	NES	0	6	1	3	2	8	52	0	6.70048	0	4.61631	4.54411	0.463211	0.962573	0.471603	0.961324	0.968409	2.89231	0	0	0	0	0	0	0	5.57072e-05	5.56793e-05	0	0.405602	0.160788	0.18361	0.0643154
P63261	ACTG1	1	11	1	8	2	20	190	0	7.30936	0	8.01197	2.88167	0.463211	0.965041	0.471603	0.970848	0.956301	2.89219	0	0	0	0	0	0	0	0.00117681	0.000723831	0.00127017	0.405602	0.760373	0.726141	0.813278
Q15393	SF3B3	2	10	2	4	3	14	140	2.13201	7.71701	2.18237	4.04293	4.73663	0.932491	0.967189	0.948839	0.954762	0.970064	2.89202	0	1	0	0	0	1	0	0.000278536	0.000139198	0.000139579	0.405602	0.448133	0.349585	0.375519
P62333	PSMC6	3	12	3	3	1	17	121	3.41433	10.7464	3.4844	3.19183	0	0.953194	0.973287	0.965157	0.941202	0.47651	2.89164	0	0	0	0	0	0	0	0.00038995	0.000194878	9.77053e-05	0.405602	0.553942	0.409751	0.289419
Q92630	DYRK2	2	2	0	3	3	8	51	3.38741	2.08392	0	4.65002	6.4956	0.952642	0.856882	0.471603	0.961614	0.976771	2.89103	0	0	0	0	0	0	0	4.17804e-05	0	8.37474e-05	0.405602	0.120332	0.0497925	0.26556
P68371	TUBB4B	4	5	0	5	2	14	136	4.38503	3.06604	0	5.29197	3.3027	0.966783	0.900058	0.471603	0.965244	0.958682	2.89071	0	0	0	0	0	0	0	0.000752047	0.000626392	0.00150745	0.405602	0.687759	0.684647	0.823651
Q9H2C0	GAN	0	9	1	7	3	17	183	0	5.6014	0	6.89128	4.28083	0.463211	0.955052	0.471603	0.969106	0.966289	2.89045	0	0	0	0	0	0	0	5.57072e-05	0.000222717	0.00033499	0.405602	0.160788	0.440871	0.526971
Q96CS3	FAF2	6	10	3	0	1	18	202	5.80668	6.09657	2.65531	0	0	0.976771	0.958827	0.954297	0.456852	0.47651	2.8899	0	0	0	0	0	0	0	0.00030639	0.000306236	0.000614148	0.405602	0.477178	0.518672	0.696058
P53671	LIMK2	4	4	0	2	1	8	28	7.84886	5.55319	0	3.99658	0	0.980894	0.954268	0.471603	0.954181	0.47651	2.88934	0	0	0	0	0	0	0	0	0	8.37474e-05	0.405602	0.0207469	0.0497925	0.26556
Q92900	UPF1	0	8	0	6	3	15	155	0	5.30636	0	6.17365	4.56284	0.463211	0.9518	0.471603	0.967828	0.968583	2.88821	0	0	0	0	0	0	0	5.57072e-05	0.000111359	8.37474e-05	0.405602	0.160788	0.288382	0.26556
P0DMV8	HSPA1A	4	14	3	8	2	23	307	2.7568	7.51283	2.01397	6.23022	2.29149	0.942451	0.966144	0.947329	0.968002	0.953659	2.8878	0	0	0	0	0	0	0.00911708	0.0251084	0.0286533	0.0360621	0.970954	0.960581	0.962656	0.96888
Q14152	EIF3A	0	9	2	6	0	17	118	0	7.37436	2.38873	6.98173	0	0.463211	0.965505	0.951103	0.969454	0.47651	2.88606	0	0	0	0	0	0	0	0.000125341	8.35189e-05	8.37474e-05	0.405602	0.29668	0.239627	0.26556
P08238	HSP90AB1	8	11	1	9	4	30	609	4.32487	2.38718	0	4.63191	3.26535	0.965912	0.870906	0.471603	0.961382	0.95842	2.88571	0	0	0	0	0	0	0.012476	0.0382371	0.0301881	0.0393841	0.989627	0.975104	0.966805	0.973029
P49407	ARRB1	4	8	3	6	4	20	248	3.16924	3.70657	2.33609	4.82317	5.11139	0.949593	0.921661	0.950436	0.962776	0.972416	2.88563	0	0	0	0	0	0	0	0.000341207	0.000487194	0.000488527	0.405602	0.514523	0.637967	0.634855
O14965	AURKA	3	11	4	9	3	21	314	1.91812	5.00141	2.79563	7.2233	3.3794	0.930604	0.947735	0.95662	0.969919	0.959059	2.8856	0	0	0	0	0	0	0	0.0109184	0.000487194	0.000586232	0.405602	0.881743	0.637967	0.685685
P47755	CAPZA2	3	13	4	2	2	21	244	2.29585	7.91601	3.28569	1.34676	2.57159	0.934785	0.967857	0.962631	0.914721	0.954965	2.88545	0	0	0	0	0	0	0	0.000250682	0	0	0.405602	0.426349	0.0497925	0.0643154
P27824	CANX	4	11	5	4	2	17	257	3.09951	5.89529	4.17338	2.83454	2.50787	0.948316	0.957607	0.972997	0.93374	0.954588	2.88519	1	0	0	0	0	1	0.006238	0.0139732	0.011943	0.0110412	0.929461	0.906639	0.906639	0.904564
P62140	PPP1CB	2	14	3	3	3	22	239	1.51603	8.98462	2.39296	2.1213	3.83182	0.9277	0.970964	0.951161	0.920557	0.963066	2.88519	0	0	0	0	0	0	0	0.000376024	0.000167038	0.000251242	0.405602	0.538382	0.385892	0.479253
P06753	TPM3	3	1	1	4	3	10	118	3.45579	0	0	4.39654	5.03003	0.953688	0.412079	0.471603	0.95935	0.971893	2.88493	0	0	0	0	0	0	0.00239923	0.0121349	0.00629859	0.00634413	0.855809	0.892116	0.879668	0.887967
Q12834	CDC20	4	7	2	4	2	15	128	4.51132	5.00687	2.29012	4.22766	3.37972	0.968148	0.947822	0.949884	0.957491	0.959146	2.88479	0	0	0	0	0	0	0	5.57072e-05	0.000222717	0.000669979	0.405602	0.160788	0.440871	0.711618
P31749	AKT1	5	10	5	4	3	21	311	3.61837	4.31869	3.71995	2.47496	3.39519	0.956446	0.935424	0.968931	0.926829	0.959233	2.88461	0	0	0	0	0	0	0	0.000905242	0.0277207	0.000697895	0.405602	0.725104	0.960581	0.726141
Q92526	CCT6B	5	7	2	1	0	12	112	6.13229	5.43765	2.45237	0	0	0.978107	0.952904	0.952003	0.456852	0.47651	2.88301	0	0	0	0	0	0	0	2.78536e-05	5.56793e-05	5.58316e-05	0.405602	0.0892116	0.18361	0.219917
Q15029	EFTUD2	0	10	1	4	2	13	136	0	7.8488	0	4.10253	3.3027	0.463211	0.967712	0.471603	0.955749	0.958682	2.88214	0	0	0	1	0	1	0.00191939	0.000222829	5.56793e-05	0.000167495	0.842324	0.40249	0.18361	0.400415
Q99460	PSMD1	2	8	3	2	2	14	126	2.25828	6.05389	3.41752	2.09695	3.39976	0.934088	0.958537	0.964286	0.919977	0.959292	2.88211	0	0	0	0	0	0	0.00527831	0.000612779	0.000459354	0.000614148	0.907676	0.633817	0.626556	0.696058
O43390	HNRNPR	0	13	1	4	2	16	157	0	10.4309	0	3.80884	3.12108	0.463211	0.972677	0.471603	0.951684	0.957578	2.88194	0	0	0	0	0	0	0	0.000229792	8.35189e-05	0.000125621	0.405602	0.409751	0.239627	0.34751
Q6ZW49	PAXIP1	4	8	1	7	2	16	194	3.65758	4.52413	0	6.69651	2.85567	0.956969	0.939373	0.471603	0.968641	0.956214	2.88182	0	0	0	0	0	0	0	6.26706e-05	0.000250557	0.000125621	0.405602	0.18361	0.467842	0.34751
P61221	ABCE1	1	10	4	4	2	17	206	0	6.0125	3.62313	3.26468	2.78094	0.463211	0.958275	0.967247	0.942334	0.955836	2.88136	0	0	0	0	0	0	0	0.000104451	0.000125278	0.000125621	0.405602	0.260373	0.322614	0.34751
Q71U36	TUBA1A	6	15	4	5	1	26	366	4.13209	7.31048	2.50664	2.93033	0	0.963647	0.965099	0.952613	0.935889	0.47651	2.88136	0	0	0	0	1	1	0	0.00133697	0.0013363	0.046119	0.405602	0.76971	0.802905	0.983402
P38398	BRCA1	7	14	2	4	2	22	411	4.72468	5.88486	0.993118	1.97234	1.9437	0.969803	0.957433	0.943264	0.918699	0.953252	2.88049	0	0	0	0	0	0	0	0.0115819	0.00075167	0.000502485	0.405602	0.883817	0.732365	0.654564
Q00325	SLC25A3	4	8	2	1	0	14	121	4.62899	6.20264	2.35821	0	0	0.969251	0.959262	0.950697	0.456852	0.47651	2.87921	1	1	0	0	0	2	0	0.000250682	0.000334076	0.000223326	0.405602	0.426349	0.542531	0.461618
O15344	MID1	1	6	3	3	1	10	79	0	5.44395	4.20042	3.9003	0	0.463211	0.952991	0.973258	0.952933	0.47651	2.87918	0	0	0	0	0	0	0	0	0.000111359	5.58316e-05	0.405602	0.0207469	0.288382	0.219917
P00558	PGK1	1	7	1	3	2	11	80	0	6.55782	0	3.87907	3.98285	0.463211	0.961847	0.471603	0.952787	0.96417	2.8788	0	0	0	0	0	0	0	0.000724194	0.000668151	0.00033499	0.405602	0.676349	0.702282	0.526971
Q15046	KARS	0	8	2	3	0	12	78	0	7.86651	2.90079	3.92182	0	0.463211	0.96777	0.957724	0.953252	0.47651	2.87875	0	1	0	0	0	1	0	0.000208902	4.17595e-05	0	0.405602	0.390041	0.156639	0.0643154
P33993	MCM7	2	13	3	3	2	17	219	1.61335	8.51769	2.52857	2.25339	2.70501	0.92831	0.970035	0.952787	0.922967	0.955401	2.87822	0	0	0	0	0	0	0	0.000940059	0.000375835	0.000628106	0.405602	0.733402	0.571577	0.701245
Q13200	PSMD2	4	10	5	0	0	15	237	3.25843	5.41997	4.36888	0	0	0.950755	0.952787	0.97439	0.456852	0.47651	2.87793	0	1	1	0	0	2	0.00863724	0.0161756	0.0145703	0.0153056	0.961618	0.914938	0.912863	0.919087
P31689	DNAJA1	4	9	2	2	2	17	165	3.98638	6.00938	1.98743	1.78165	3.05849	0.962137	0.958188	0.947184	0.917044	0.957288	2.87761	1	1	0	0	0	2	0.00767754	0.0198342	0.0180606	0.0230631	0.94917	0.943983	0.935685	0.941909
Q15750	TAB1	1	9	2	3	2	11	117	0	7.40983	2.39909	3.2468	3.49423	0.463211	0.965738	0.951249	0.942247	0.959756	2.87674	0	0	0	0	0	0	0	0.000278536	0.000111359	0.00033499	0.405602	0.448133	0.288382	0.526971
P08779	KRT16	3	1	2	4	1	11	97	3.7821	0	2.62914	4.80779	0	0.959262	0.412079	0.954036	0.96266	0.47651	2.87596	0	1	0	0	0	1	0	0.000111414	0	0.000390821	0.405602	0.279046	0.0497925	0.570539
P04406	GAPDH	4	11	1	4	2	19	202	3.57632	7.01683	0	3.30341	2.80533	0.955923	0.963763	0.471603	0.943293	0.955952	2.87564	0	0	0	0	0	0	0	0.00139268	0.000974388	0.00139579	0.405602	0.773859	0.764523	0.817427
P11142	HSPA8	5	16	4	8	2	28	490	2.59272	6.30527	1.9789	4.58094	1.73947	0.939895	0.960395	0.947038	0.960918	0.953136	2.87445	0	0	0	0	0	0	0.00959693	0.0346282	0.0310893	0.0425458	0.978216	0.970954	0.970954	0.975104
P01241	GH1	0	6	2	3	0	10	68	0	5.88736	3.07378	4.15477	0	0.463211	0.95752	0.959988	0.956533	0.47651	2.87404	0	0	0	0	0	0	0	1.39268e-05	0	1.39579e-05	0.405602	0.0612033	0.0497925	0.133817
O00410	IPO5	3	2	2	4	0	9	100	3.73108	1.31773	2.59153	4.74348	0	0.958101	0.831736	0.953542	0.962253	0.47651	2.8739	0	1	0	0	0	1	0.132198	0.145439	0.0109964	0.00993855	0.991701	0.989627	0.900415	0.896266
Q13347	EIF3I	0	8	2	3	1	11	87	0	7.44424	2.7642	3.73798	0	0.463211	0.965854	0.956156	0.950145	0.47651	2.87215	0	0	0	0	0	0	0	4.17804e-05	1.39198e-05	2.79158e-05	0.405602	0.120332	0.107884	0.161826
P04899	GNAI2	2	5	2	4	2	12	122	2.29721	3.31457	2.34823	4.32719	3.44085	0.934901	0.909843	0.950552	0.958624	0.959524	2.8687	0	0	0	0	0	0	0.00143954	0.00416701	0.00725552	0.00547874	0.827801	0.829876	0.885892	0.881743
P07195	LDHB	3	8	2	1	1	12	114	3.51287	6.42305	2.43075	0	0	0.954965	0.961498	0.951684	0.456852	0.47651	2.86815	0	0	0	0	0	0	0	9.74876e-05	0.0106694	8.37474e-05	0.405602	0.244813	0.89834	0.26556
Q00535	CDK5	3	9	2	2	1	13	122	3.40076	7.23581	2.34823	2.13536	0	0.952904	0.964634	0.950552	0.920848	0.47651	2.86809	0	0	0	0	0	0	0	0.0061744	0.000208797	0.000209369	0.405602	0.846473	0.420124	0.437759
P50570	DNM2	0	5	3	4	2	11	160	0	2.70393	3.02743	3.77041	3.09722	0.463211	0.886179	0.959698	0.950697	0.957491	2.86789	0	0	0	0	0	0	0	0.000208902	8.35189e-05	0.00033499	0.405602	0.390041	0.239627	0.526971
O75665	OFD1	4	12	3	0	1	18	238	3.25013	7.13233	2.39943	0	0	0.950697	0.964111	0.951365	0.456852	0.47651	2.86617	0	0	0	0	0	0	0	0.000174085	0.000139198	6.97895e-05	0.405602	0.368257	0.349585	0.238589
P62910	RPL32	0	5	0	14	5	21	105	0	3.66563	0	20.5513	8.79304	0.463211	0.92079	0.471603	0.979152	0.979791	1.95894	0	0	0	0	0	0	0	0.000125341	8.35189e-05	4.18737e-05	0.405602	0.29668	0.239627	0.196058
P39023	RPL3	1	8	0	16	5	28	164	0	5.10678	0	20.8745	7.62609	0.463211	0.948955	0.471603	0.979326	0.978688	1.95801	0	0	0	0	0	0	0	0.000250682	0.000167038	0.000167495	0.405602	0.426349	0.385892	0.400415
P50914	RPL14	1	8	0	16	5	28	182	0	4.74351	0	20.0845	7.35619	0.463211	0.943438	0.471603	0.978688	0.978455	1.95714	0	0	0	0	0	0	0	0.000278536	0.000334076	0.000279158	0.405602	0.448133	0.542531	0.492739
P62854	RPS26	2	5	0	15	4	24	132	2.20236	3.13384	0	20.7454	6.45965	0.933508	0.902439	0.471603	0.97921	0.976597	1.95581	0	1	0	0	0	1	0	8.35608e-05	0.000111359	0.000111663	0.405602	0.223029	0.288382	0.313278
P18077	RPL35A	0	3	0	12	4	18	89	0	2.22208	0	17.9236	7.31832	0.463211	0.863211	0.471603	0.976887	0.978397	1.95528	0	0	0	0	0	0	0	2.78536e-05	2.78396e-05	2.79158e-05	0.405602	0.0892116	0.131743	0.161826
P63173	RPL38	0	7	1	14	4	24	126	0	5.05724	0	19.305	6.56037	0.463211	0.948548	0.471603	0.978049	0.976945	1.95499	0	0	0	0	0	0	0	6.9634e-05	0.000111359	0.000111663	0.405602	0.19917	0.288382	0.313278
Q9BQE3	TUBA1C	8	14	1	3	1	24	179	8.77812	10.7559	0	2.5649	0	0.981533	0.973345	0.471603	0.928949	0.47651	1.95488	1	0	0	0	0	1	0	0.000752047	0.000668151	0.00150745	0.405602	0.687759	0.702282	0.823651
P62913	RPL11	1	8	0	15	5	28	203	0	4.36994	0	17.675	7.07428	0.463211	0.936382	0.471603	0.976539	0.978107	1.95465	0	0	0	1	0	1	0	0.000501365	0.000167038	0.00033499	0.405602	0.599585	0.385892	0.526971
P62841	RPS15	1	5	1	14	4	24	131	0	3.15117	0	19.0414	6.4761	0.463211	0.904007	0.471603	0.977729	0.976713	1.95444	0	0	0	0	0	0	0	5.57072e-05	8.35189e-05	8.37474e-05	0.405602	0.160788	0.239627	0.26556
Q6DKI1	RPL7L1	0	3	0	8	4	11	53	0	3.04554	0	13.084	8.46723	0.463211	0.899245	0.471603	0.97439	0.979675	1.95407	0	0	0	0	0	0	0	1.39268e-05	1.39198e-05	0	0.405602	0.0612033	0.107884	0.0643154
P05386	RPLP1	2	7	1	13	4	25	124	2.27758	5.10854	0	17.6696	6.59505	0.934524	0.949042	0.471603	0.976481	0.977091	1.95357	0	0	0	0	0	0	0	0.000104451	0.000208797	6.97895e-05	0.405602	0.260373	0.420124	0.238589
P62917	RPL8	2	7	0	15	4	26	176	1.86284	4.01538	0	18.6825	5.8405	0.930256	0.930023	0.471603	0.97741	0.975552	1.95296	0	0	0	0	0	0	0	0.00030639	0.000222717	0.000223326	0.405602	0.477178	0.440871	0.461618
Q96L21	RPL10L	1	4	0	12	3	19	78	0	3.36255	0	18.717	5.74785	0.463211	0.911382	0.471603	0.977526	0.974913	1.95244	0	0	0	0	0	0	0	1.39268e-05	2.78396e-05	2.79158e-05	0.405602	0.0612033	0.131743	0.161826
P46781	RPS9	1	7	0	15	4	26	180	0	3.94752	0	18.5232	5.79241	0.463211	0.927555	0.471603	0.977236	0.975116	1.95235	0	0	0	1	0	1	0	0.000584926	0.000417595	0.000669979	0.405602	0.623444	0.603734	0.711618
P40429	RPL13A	0	4	0	15	3	21	115	0	2.60493	0	21.751	5.07438	0.463211	0.881185	0.471603	0.980197	0.972096	1.95229	0	0	0	0	0	0	0	9.74876e-05	0.000139198	0.000111663	0.405602	0.244813	0.349585	0.313278
Q86XA0	METTL23	4	6	0	0	0	8	26	8.02138	8.93232	0	0	0	0.981127	0.97079	0.471603	0.456852	0.47651	1.95192	0	0	0	0	0	0	0	0	0	0	0.405602	0.0207469	0.0497925	0.0643154
P62857	RPS28	0	5	0	14	3	21	109	0	3.57736	0	20.2941	5.1668	0.463211	0.918612	0.471603	0.978978	0.972706	1.95168	0	0	0	0	0	0	0	6.9634e-05	8.35189e-05	0.000111663	0.405602	0.19917	0.239627	0.313278
P42766	RPL35	1	5	0	15	3	23	123	0	3.29573	0	21.259	4.95864	0.463211	0.909582	0.471603	0.979791	0.971632	1.95142	0	0	0	0	0	0	0	8.35608e-05	5.56793e-05	8.37474e-05	0.405602	0.223029	0.18361	0.26556
Q86XR8	CEP57	1	2	1	9	4	13	119	0	1.13635	0	11.3356	6.68435	0.463211	0.82921	0.471603	0.973461	0.977236	1.9507	0	0	0	0	0	0	0	4.17804e-05	0.000167038	0.000251242	0.405602	0.120332	0.385892	0.479253
Q16643	DBN1	2	13	7	3	1	24	228	1.56832	8.29232	6.77306	2.19228	0	0.927933	0.969222	0.981243	0.921574	0.47651	1.95046	0	0	0	0	0	0	0	0.000612779	0.000445434	0.000223326	0.405602	0.633817	0.61722	0.461618
Q96H55	MYO19	1	14	5	1	1	20	182	0	10.6522	5.01652	0	0	0.463211	0.972938	0.977178	0.456852	0.47651	1.95012	0	0	0	0	0	0	0	0.000194975	9.74388e-05	9.77053e-05	0.405602	0.379668	0.264523	0.289419
P49207	RPL34	0	2	0	10	3	14	79	0	1.57557	0	14.935	5.7256	0.463211	0.837253	0.471603	0.975029	0.974855	1.94988	0	0	0	0	0	0	0	5.57072e-05	8.35189e-05	2.79158e-05	0.405602	0.160788	0.239627	0.161826
P20618	PSMB1	6	7	4	3	1	18	179	6.15869	3.96431	3.90761	2.5649	0	0.978281	0.928746	0.971429	0.928949	0.47651	1.94971	0	0	0	0	0	0	0.00239923	0.0089905	0.00236637	0.00586956	0.855809	0.873444	0.844398	0.885892
O43396	TXNL1	1	7	4	0	0	10	54	0	7.92572	6.45782	0	0	0.463211	0.968002	0.980836	0.456852	0.47651	1.94884	0	0	0	0	0	0	0	2.78536e-05	0.000111359	0	0.405602	0.0892116	0.288382	0.0643154
P47914	RPL29	0	4	0	7	3	13	68	0	3.64083	0	10.325	5.98803	0.463211	0.919657	0.471603	0.972764	0.9759	1.94866	0	1	0	0	1	2	0	0.000167122	0.000167038	0	0.405602	0.350622	0.385892	0.0643154
P35241	RDX	4	2	3	0	0	7	78	5.5631	1.58986	4.22211	0	0	0.975261	0.837776	0.973345	0.456852	0.47651	1.94861	1	0	0	0	0	1	0	0.00671851	0.0142326	8.37474e-05	0.405602	0.852697	0.908714	0.26556
P61254	RPL26	1	4	0	11	3	18	101	0	2.85296	0	15.4178	5.29857	0.463211	0.892712	0.471603	0.975319	0.973287	1.94861	0	0	0	0	0	0	0	6.9634e-05	8.35189e-05	0.000139579	0.405602	0.19917	0.239627	0.375519
P62269	RPS18	1	6	0	16	3	25	154	0	3.57544	0	21.3548	4.57387	0.463211	0.91838	0.471603	0.979849	0.968699	1.94855	0	0	0	0	0	0	0	0.000278536	0.000347996	0.000558316	0.405602	0.448133	0.56639	0.675311
Q53GQ0	HSD17B12	4	4	2	2	0	9	42	6.92453	4.6556	3.69224	3.46599	0	0.979675	0.942596	0.96867	0.945703	0.47651	1.94834	0	0	0	0	0	0	0	5.57072e-05	8.35189e-05	2.79158e-05	0.405602	0.160788	0.239627	0.161826
P05387	RPLP2	1	7	0	14	3	24	131	0	4.93299	0	19.0414	4.85044	0.463211	0.946806	0.471603	0.977729	0.970616	1.94834	0	0	0	0	0	0	0	0.000125341	0.000167038	8.37474e-05	0.405602	0.29668	0.385892	0.26556
P46783	RPS10	1	5	0	16	3	24	157	0	2.74547	0	21.2072	4.541	0.463211	0.888473	0.471603	0.979704	0.968264	1.94797	0	0	0	0	0	0	0	0.00034817	0.000139198	0.0220018	0.405602	0.522822	0.349585	0.937759
P83731	RPL24	1	7	0	15	3	25	149	0	4.52722	0	19.8712	4.63017	0.463211	0.93946	0.471603	0.978571	0.969135	1.94771	0	0	0	0	0	0	0	0.000376024	0.000250557	0.000418737	0.405602	0.538382	0.467842	0.595436
P46782	RPS5	2	7	1	16	3	27	159	1.98141	4.32576	0	21.1106	4.51945	0.930894	0.935801	0.471603	0.979501	0.968148	1.94765	0	0	0	0	0	0	0	0.000278536	0.000334076	0.000279158	0.405602	0.448133	0.542531	0.492739
P62633	CNBP	0	4	0	11	3	17	111	0	2.672	0	14.9085	5.13542	0.463211	0.884553	0.471603	0.974971	0.972503	1.94747	0	0	0	0	0	0	0	0	0	0	0.405602	0.0207469	0.0497925	0.0643154
P11940	PABPC1	1	9	1	11	4	22	216	0	4.96308	0	11.4148	5.40384	0.463211	0.94698	0.471603	0.973577	0.973751	1.94733	0	0	0	0	0	0	0	0.000591889	0.000139198	0.000209369	0.405602	0.629668	0.349585	0.437759
P39019	RPS19	1	7	2	16	3	27	160	0	4.30643	2.02367	21.0627	4.50878	0.463211	0.935366	0.947387	0.979413	0.967828	1.94724	0	0	0	1	0	1	0	0.000208902	8.35189e-05	0.00033499	0.405602	0.390041	0.239627	0.526971
O00213	APBB1	0	11	1	2	3	12	96	0	10.7427	0	2.42478	5.38652	0.463211	0.973229	0.471603	0.925581	0.973693	1.94692	0	0	0	0	0	0	0	2.78536e-05	2.78396e-05	4.18737e-05	0.405602	0.0892116	0.131743	0.196058
P07384	CAPN1	5	4	3	1	1	10	107	6.24945	2.74199	3.68878	0	0	0.978339	0.88824	0.968409	0.456852	0.47651	1.94675	0	1	0	0	0	1	0	0.00413219	0.0089955	0.000125621	0.405602	0.827801	0.892116	0.34751
Q9BZE4	GTPBP4	1	5	0	8	3	14	98	0	3.82985	0	10.5818	5.35079	0.463211	0.924042	0.471603	0.972967	0.973519	1.94649	0	0	0	0	0	0	0	5.57072e-05	2.78396e-05	1.39579e-05	0.405602	0.160788	0.131743	0.133817
Q9NQW6	ANLN	2	11	4	0	1	16	138	2.14918	8.87974	4.44365	0	0	0.93284	0.970732	0.974739	0.456852	0.47651	1.94547	0	0	0	0	0	0	0	0.000125341	8.35189e-05	0	0.405602	0.29668	0.239627	0.0643154
P20333	TNFRSF1B	6	8	1	2	1	15	94	8.08545	7.14834	0	2.45051	0	0.981185	0.964257	0.471603	0.926161	0.47651	1.94544	0	0	0	0	0	0	0	5.57072e-05	0.000334076	0.000223326	0.405602	0.160788	0.542531	0.461618
Q9H9G7	AGO3	3	5	1	2	3	10	60	4.60015	5.04287	0	3.00963	6.20818	0.968757	0.948374	0.471603	0.937631	0.976249	1.94501	0	0	0	0	0	0	0	4.87438e-05	0	0.000195411	0.405602	0.139004	0.0497925	0.419087
O00231	PSMD11	6	7	3	2	0	14	125	7.22272	5.08277	3.43066	2.10642	0	0.980168	0.948839	0.964373	0.920122	0.47651	1.94454	0	0	0	0	0	0	0.00431862	0.00697519	0.00692499	0.00813436	0.892116	0.854772	0.883817	0.892116
P36578	RPL4	2	8	0	15	3	26	178	1.84975	4.82048	0	18.6024	4.32774	0.930197	0.945064	0.471603	0.977294	0.966783	1.94408	0	0	0	0	1	1	0	0.000334243	0.000334076	0.000279158	0.405602	0.504149	0.542531	0.492739
O00571	DDX3X	1	15	1	7	1	23	179	0	11.8791	0	6.96527	0	0.463211	0.974274	0.471603	0.969396	0.47651	1.94367	0	1	0	0	0	1	0	0.000779901	0.000668151	0.00033499	0.405602	0.695021	0.702282	0.526971
P62273	RPS29	0	4	0	11	2	14	63	0	3.79787	0	18.0287	4.29314	0.463211	0.923693	0.471603	0.977003	0.966463	1.94347	0	0	0	0	0	0	0	0	0	0	0.405602	0.0207469	0.0497925	0.0643154
P62888	RPL30	1	5	0	13	3	21	163	0	2.66334	0	15.9642	4.47717	0.463211	0.884088	0.471603	0.975726	0.967654	1.94338	0	0	0	1	0	1	0	0.000167122	8.35189e-05	0.000209369	0.405602	0.350622	0.239627	0.437759
Q02543	RPL18A	1	7	0	14	3	24	167	0	4.17503	0	17.4145	4.43597	0.463211	0.933217	0.471603	0.976249	0.967073	1.94332	0	0	0	0	0	0	0	0.000167122	0.000167038	0.000223326	0.405602	0.350622	0.385892	0.461618
Q15020	SART3	0	5	1	6	3	11	103	0	3.71123	0	7.3905	5.26464	0.463211	0.921748	0.471603	0.970093	0.9732	1.94329	0	0	0	0	0	0	0	4.17804e-05	2.78396e-05	2.79158e-05	0.405602	0.120332	0.131743	0.161826
Q9UNX3	RPL26L1	1	7	0	10	3	20	146	0	4.59076	0	11.9221	4.6649	0.463211	0.94158	0.471603	0.97381	0.969396	1.94321	0	0	0	0	0	0	0	1.39268e-05	1.39198e-05	1.39579e-05	0.405602	0.0612033	0.107884	0.133817
Q96AC1	FERMT2	0	7	3	0	0	8	58	0	7.67224	4.73139	0	0	0.463211	0.966928	0.976074	0.456852	0.47651	1.943	0	0	0	0	0	0	0	6.26706e-05	0.000125278	4.18737e-05	0.405602	0.18361	0.322614	0.196058
O15297	PPM1D	3	3	2	0	0	6	41	5.26552	3.47394	3.72359	0	0	0.973693	0.914866	0.969222	0.456852	0.47651	1.94292	0	0	0	0	0	0	0	6.9634e-06	0	0	0.405602	0.0446058	0.0497925	0.0643154
Q92560	BAP1	3	4	3	0	0	7	65	4.46217	3.73343	4.53448	0	0	0.967654	0.922067	0.975058	0.456852	0.47651	1.94271	0	0	0	0	0	0	0	6.9634e-05	6.95991e-05	0	0.405602	0.19917	0.208506	0.0643154
P53779	MAPK10	3	3	2	0	0	6	42	5.22297	3.4332	3.69224	0	0	0.973519	0.913763	0.96867	0.456852	0.47651	1.94219	0	0	0	0	0	0	0	0.0025575	5.56793e-05	5.58316e-05	0.405602	0.802905	0.18361	0.219917
Q7KZF4	SND1	1	11	0	5	1	18	86	0	11.324	0	6.46095	0	0.463211	0.973751	0.471603	0.968351	0.47651	1.9421	0	0	0	0	0	0	0	0.000111414	0.000111359	8.37474e-05	0.405602	0.279046	0.288382	0.26556
Q8TDR0	TRAF3IP1	1	3	1	4	3	9	74	0	2.50826	0	5.38528	5.83987	0.463211	0.876887	0.471603	0.965592	0.975494	1.94109	0	0	0	0	0	0	0	9.74876e-05	0	0.000195411	0.405602	0.244813	0.0497925	0.419087
P34932	HSPA4	7	13	3	2	1	19	286	5.8816	7.05146	2.11967	1.17986	0	0.977062	0.963879	0.9482	0.914228	0.47651	1.94094	0	0	0	0	0	0	0.00911708	0.169236	0.024996	0.023761	0.970954	0.997925	0.952282	0.946058
Q9BRP8	PYM1	1	4	0	9	2	13	65	0	3.73343	0	14.0524	4.25241	0.463211	0.922067	0.471603	0.974681	0.966057	1.94074	0	0	0	0	0	0	0	6.9634e-06	2.78396e-05	2.79158e-05	0.405602	0.0446058	0.131743	0.161826
P42771	CDKN2A	2	6	0	6	3	15	123	2.28735	4.18362	0	6.85774	4.95864	0.934727	0.933304	0.471603	0.969048	0.971632	1.94068	0	0	0	0	0	0	0	0.000543145	8.35189e-05	0.000251242	0.405602	0.610996	0.239627	0.479253
Q92499	DDX1	1	15	3	2	1	18	124	0	14.4057	3.44392	2.11598	0	0.463211	0.975958	0.964721	0.920412	0.47651	1.94068	0	0	0	0	0	0	0	0.00034817	0.000278396	0.000348948	0.405602	0.522822	0.491701	0.551867
P62263	RPS14	2	9	0	14	3	27	209	1.666	5.08838	0	15.9363	4.05668	0.928571	0.948897	0.471603	0.97561	0.964925	1.94053	0	0	0	1	1	2	0.00191939	0.000362097	0.000111359	0.000390821	0.842324	0.532158	0.288382	0.570539
Q8NC51	SERBP1	1	4	0	5	3	10	105	0	2.77815	0	5.94711	5.23138	0.463211	0.889141	0.471603	0.967305	0.973055	1.94036	0	0	0	0	0	0	0	0.00030639	0.000278396	0.000223326	0.405602	0.477178	0.491701	0.461618
Q9Y490	TLN1	0	3	3	1	2	9	68	0	2.64209	4.45687	0	4.19368	0.463211	0.882549	0.974826	0.456852	0.965447	1.94027	0	0	0	0	0	0	0	0.000167122	0.000139198	0.000139579	0.405602	0.350622	0.349585	0.375519
Q13286	CLN3	9	5	2	1	0	14	79	13.7872	4.35332	2.8848	0	0	0.982578	0.936179	0.957491	0.456852	0.47651	1.94007	0	0	0	0	0	0	0	0	5.56793e-05	0	0.405602	0.0207469	0.18361	0.0643154
P62829	RPL23	2	9	1	15	3	28	223	1.59307	4.84254	0	17.0171	3.94779	0.92802	0.945354	0.471603	0.976132	0.963821	1.93995	0	0	0	0	0	0	0	0.000417804	0.0272616	0.000837474	0.405602	0.565353	0.956432	0.755187
Q71UM5	RPS27L	0	3	0	10	2	15	77	0	2.44593	0	15.0641	4.03234	0.463211	0.874477	0.471603	0.975145	0.964692	1.93984	0	1	0	0	0	1	0	2.78536e-05	8.35189e-05	2.79158e-05	0.405602	0.0892116	0.239627	0.161826
O15479	MAGEB2	0	3	0	4	2	7	40	0	3.51579	0	6.73765	4.88989	0.463211	0.916957	0.471603	0.968873	0.970819	1.93969	0	0	0	0	0	0	0	0	0	0	0.405602	0.0207469	0.0497925	0.0643154
P30101	PDIA3	2	8	5	0	0	13	121	2.30716	6.20264	6.04455	0	0	0.935075	0.959262	0.980256	0.456852	0.47651	1.93952	0	1	0	0	0	1	0	0.000313353	0.0149183	0.000139579	0.405602	0.490664	0.914938	0.375519
Q6IBS0	TWF2	4	0	0	3	0	6	54	6.36537	0	0	4.5509	0	0.97863	0.412079	0.471603	0.96083	0.47651	1.93946	0	0	0	0	0	0	0	0.000104451	6.95991e-05	0	0.405602	0.260373	0.208506	0.0643154
P61019	RAB2A	4	5	3	2	0	13	108	4.86821	3.59908	3.67325	2.2817	0	0.970964	0.918961	0.968293	0.923519	0.47651	1.93926	0	0	0	0	0	0	0	6.26706e-05	0	0	0.405602	0.18361	0.0497925	0.0643154
O43353	RIPK2	2	3	3	2	2	8	75	2.89733	2.48716	4.28903	2.72939	4.06644	0.944222	0.876568	0.973839	0.931852	0.965012	1.93885	0	0	0	0	0	0	0	0.0047529	0	0.000111663	0.405602	0.83195	0.0497925	0.313278
Q96LY2	CCDC74B	0	4	3	0	0	5	23	0	6.00448	6.38147	0	0	0.463211	0.95813	0.980662	0.456852	0.47651	1.93879	0	0	0	0	0	0	0	0	0	0	0.405602	0.0207469	0.0497925	0.0643154
Q9UJM3	ERRFI1	4	3	0	2	2	11	86	5.3531	2.27459	0	2.55976	3.8894	0.974216	0.865883	0.471603	0.92863	0.963676	1.93789	0	0	0	0	0	0	0	0.000139268	0.000167038	0.000390821	0.405602	0.315353	0.385892	0.570539
P51608	MECP2	0	2	0	4	3	6	90	0	1.43139	0	4.96654	5.49855	0.463211	0.833304	0.471603	0.963763	0.9741	1.93786	0	0	0	0	0	0	0	0	0	0	0.405602	0.0207469	0.0497925	0.0643154
P31483	TIA1	0	3	0	4	2	6	46	0	3.28039	0	6.42535	4.7053	0.463211	0.909292	0.471603	0.968206	0.969657	1.93786	0	0	0	0	0	0	0	3.4817e-05	1.39198e-05	2.79158e-05	0.405602	0.102697	0.107884	0.161826
P15374	UCHL3	3	2	3	0	0	7	77	4.17228	1.60437	4.24411	0	0	0.964228	0.838386	0.973548	0.456852	0.47651	1.93778	0	0	0	0	0	0	0	0.00357512	0.000167038	4.18737e-05	0.405602	0.821577	0.385892	0.196058
O75815	BCAR3	0	7	3	1	0	7	72	0	6.91827	4.35884	0	0	0.463211	0.963357	0.974332	0.456852	0.47651	1.93769	0	0	0	0	0	0	0	4.17804e-05	4.17595e-05	0.000167495	0.405602	0.120332	0.156639	0.400415
Q15008	PSMD6	4	6	3	1	0	11	111	4.81037	4.46892	3.62758	0	0	0.970325	0.938763	0.967364	0.456852	0.47651	1.93769	0	0	0	0	0	0	0	0.000292463	0.000194878	0	0.405602	0.46473	0.409751	0.0643154
P26640	VARS	0	10	0	4	1	14	79	0	10.4095	0	5.24479	0	0.463211	0.97259	0.471603	0.965041	0.47651	1.93763	0	0	0	0	0	0	0	0.000167122	0.000167038	0.000167495	0.405602	0.350622	0.385892	0.400415
P55036	PSMD4	3	9	5	0	0	15	159	2.969	6.15697	5.35342	0	0	0.945819	0.959059	0.978455	0.456852	0.47651	1.93751	0	0	0	0	0	0	0	0.000341207	0.000389755	0.000195411	0.405602	0.514523	0.584025	0.419087
Q99972	MYOC	3	2	1	3	0	9	42	5.22297	2.31954	0	4.98941	0	0.973519	0.867422	0.471603	0.963879	0.47651	1.9374	0	0	0	0	0	0	0	0.000104451	0	4.18737e-05	0.405602	0.260373	0.0497925	0.196058
Q1A5X7	NA	3	1	0	3	0	6	42	5.22297	0	0	4.98941	0	0.973519	0.412079	0.471603	0.963879	0.47651	1.9374	0	0	0	0	0	0	0	0	0	0	0.405602	0.0207469	0.0497925	0.0643154
Q96P70	IPO9	2	7	3	1	0	9	74	2.91419	6.8241	4.31196	0	0	0.944686	0.963095	0.973984	0.456852	0.47651	1.93708	0	0	0	0	0	0	0.00239923	0.00563125	0.00532421	0.00517167	0.855809	0.838174	0.873444	0.879668
P12814	ACTN1	1	3	5	3	2	12	151	0	1.45739	5.48305	2.834	3.17025	0.463211	0.834292	0.978746	0.933682	0.957898	1.93664	0	0	0	0	0	0	0	0.0131366	0.000459354	0.000460611	0.405602	0.89834	0.626556	0.622407
Q5T3F8	TMEM63B	3	4	3	2	0	9	80	4.10729	3.31176	4.17901	2.64918	0	0.963473	0.909727	0.973113	0.930778	0.47651	1.93659	0	0	0	0	0	0	0	0	0	0	0.405602	0.0207469	0.0497925	0.0643154
P29597	TYK2	1	9	1	5	1	13	99	0	8.11379	0	6.09784	0	0.463211	0.968612	0.471603	0.967683	0.47651	1.9363	0	0	0	0	0	0	0	5.57072e-05	0.000222717	0.00033499	0.405602	0.160788	0.440871	0.526971
Q15717	ELAVL1	0	8	1	3	3	11	103	0	6.80235	0	3.45667	5.26464	0.463211	0.96295	0.471603	0.945587	0.9732	1.93615	0	0	0	0	0	0	0	0.000724194	0.000556793	0.000446653	0.405602	0.676349	0.660788	0.614108
P62330	ARF6	3	9	4	1	1	16	146	3.10691	6.49997	4.32658	0	0	0.948374	0.961731	0.974274	0.456852	0.47651	1.936	0	0	0	0	0	0	0	0.00260528	2.78396e-05	2.79158e-05	0.405602	0.804979	0.131743	0.161826
Q9Y478	PRKAB1	1	10	4	2	0	16	166	0	6.95309	4.0618	1.77471	0	0.463211	0.963531	0.972474	0.916957	0.47651	1.936	0	0	0	0	0	0	0	0.00314939	2.78396e-05	0.000111663	0.405602	0.819502	0.131743	0.313278
P06493	CDK1	1	11	5	4	1	17	230	0	6.40633	4.44163	3.04877	0	0.463211	0.961208	0.974681	0.938357	0.47651	1.93589	0	0	0	0	0	0	0	0.000779901	0.000334076	0.00033499	0.405602	0.695021	0.542531	0.526971
Q6NUS6	TCTN3	7	5	4	1	0	16	287	5.87025	1.5231	2.96841	0	0	0.977003	0.83583	0.958856	0.456852	0.47651	1.93586	0	0	0	0	0	0	0	2.78536e-05	5.56793e-05	0	0.405602	0.0892116	0.18361	0.0643154
Q9BQG0	MYBBP1A	1	5	0	8	2	15	93	0	3.95561	0	10.7903	3.78854	0.463211	0.928078	0.471603	0.973229	0.962369	1.9356	0	0	0	0	0	0	0	4.87438e-05	2.78396e-05	2.79158e-05	0.405602	0.139004	0.131743	0.161826
Q92542	NCSTN	4	5	1	3	2	11	93	5.18572	3.95561	0	3.62642	3.78854	0.973113	0.928078	0.471603	0.947997	0.962369	1.93548	0	0	0	0	0	0	0	1.39268e-05	1.39198e-05	1.39579e-05	0.405602	0.0612033	0.107884	0.133817
P04632	CAPNS1	3	7	0	1	0	10	60	4.60015	7.55274	0	0	0	0.968757	0.966376	0.471603	0.456852	0.47651	1.93513	0	1	0	0	0	1	0.000479846	0.00490706	0.00861612	0.0046971	0.813278	0.834025	0.890041	0.871369
P55769	SNU13	0	5	1	11	2	17	116	0	3.43158	0	14.6721	3.50519	0.463211	0.913415	0.471603	0.974913	0.959901	1.93481	0	0	0	0	0	0	0	6.26706e-05	8.35189e-05	8.37474e-05	0.405602	0.18361	0.239627	0.26556
P05787	KRT8	3	5	0	5	1	11	72	4.2868	4.5833	0	6.92424	0	0.965563	0.941492	0.471603	0.969222	0.47651	1.93479	0	0	0	0	0	0	0	0.00718602	0.0112573	0.0111426	0.405602	0.858921	0.904564	0.906639
B5ME19	EIF3CL	0	4	2	3	0	9	39	0	4.81662	3.78879	5.12006	0	0.463211	0.94489	0.970064	0.964489	0.47651	1.93455	0	0	0	0	0	0	0	0	0	0	0.405602	0.0207469	0.0497925	0.0643154
O95817	BAG3	3	17	6	5	1	25	454	1.39989	7.52279	3.67007	2.46036	0	0.92712	0.966318	0.968177	0.926481	0.47651	1.93449	0	0	0	0	0	0	0.00527831	0.0130879	0.000612472	0.000307074	0.907676	0.896266	0.676349	0.504149
P17931	LGALS3	1	7	4	3	3	17	197	0	3.67808	3.71317	2.41581	4.15628	0.463211	0.92108	0.968873	0.925494	0.965389	1.93426	0	0	0	0	0	0	0.000479846	0.00614751	0.00490661	0.00486459	0.813278	0.844398	0.871369	0.877593
Q14D33	RTP5	3	1	1	3	0	6	48	4.98826	0	0	4.75554	0	0.971806	0.412079	0.471603	0.962398	0.47651	1.9342	0	0	0	0	0	0	0	0	0	0	0.405602	0.0207469	0.0497925	0.0643154
P62195	PSMC5	7	8	3	1	1	15	203	7.01346	4.36994	2.64753	0	0	0.979791	0.936382	0.954181	0.456852	0.47651	1.93397	0	0	0	0	0	0	0	0.000536182	0.000459354	0.000614148	0.405602	0.607884	0.626556	0.696058
P21926	CD9	2	3	4	0	0	9	50	3.41287	3.14168	6.62824	0	0	0.95302	0.90363	0.980894	0.456852	0.47651	1.93391	0	0	0	0	0	0	0	1.39268e-05	5.56793e-05	2.79158e-05	0.405602	0.0612033	0.18361	0.161826
O75787	ATP6AP2	3	6	4	1	0	14	106	3.63378	4.59844	4.998	0	0	0.956562	0.941696	0.97712	0.456852	0.47651	1.93368	0	0	0	0	0	0	0	6.9634e-06	1.39198e-05	0	0.405602	0.0446058	0.107884	0.0643154
P35998	PSMC2	5	9	2	2	1	15	155	5.30906	6.25897	2.06119	1.85376	0	0.97381	0.959785	0.947735	0.917422	0.47651	1.93359	0	1	1	0	0	2	0.00575816	0.000417804	0.000501114	0.000502485	0.919087	0.565353	0.646266	0.654564
P28062	PSMB8	1	6	3	0	0	8	65	0	6.02234	4.53448	0	0	0.463211	0.958391	0.975058	0.456852	0.47651	1.93345	0	0	0	0	0	0	0	4.17804e-05	0	0	0.405602	0.120332	0.0497925	0.0643154
P12035	KRT3	3	2	0	3	0	7	50	4.91688	2.1077	0	4.68445	0	0.971341	0.858391	0.471603	0.962079	0.47651	1.93342	0	0	0	0	0	0	0	2.08902e-05	0	2.79158e-05	0.405602	0.0767635	0.0497925	0.161826
P50991	CCT4	6	8	1	3	2	17	201	5.82107	4.40349	0	2.38478	2.8115	0.976829	0.937747	0.471603	0.924797	0.956069	1.9329	0	1	0	0	0	1	0.00527831	0.0169077	0.0110835	0.0161012	0.907676	0.925311	0.90249	0.923237
P26038	MSN	4	2	3	1	0	8	125	4.56088	1.0866	3.43066	0	0	0.968525	0.828688	0.964373	0.456852	0.47651	1.9329	0	0	0	0	0	0	0	0.00822956	0.0167521	0.0164223	0.405602	0.865145	0.927386	0.927386
P51149	RAB7A	3	9	4	2	0	14	156	2.9997	6.23319	4.1896	1.84631	0	0.946196	0.959524	0.973171	0.917305	0.47651	1.93269	0	0	1	0	0	1	0	0.000278536	5.56793e-05	5.58316e-05	0.405602	0.448133	0.18361	0.219917
P60896	SEM1	0	7	4	0	0	9	105	0	5.64875	5.01811	0	0	0.463211	0.955459	0.977236	0.456852	0.47651	1.93269	0	0	0	0	0	0	0	8.35608e-05	0	0	0.405602	0.223029	0.0497925	0.0643154
P46779	RPL28	2	3	0	9	2	15	125	2.26789	1.72007	0	11.12	3.40991	0.934321	0.842886	0.471603	0.973287	0.95935	1.93264	0	0	0	0	0	0	0	6.9634e-05	5.56793e-05	0.000111663	0.405602	0.19917	0.18361	0.313278
O75832	PSMD10	2	6	3	2	1	11	68	3.02076	5.88736	4.45687	2.85191	0	0.946603	0.95752	0.974826	0.933943	0.47651	1.93235	0	0	0	0	0	0	0	8.35608e-05	0	0	0.405602	0.223029	0.0497925	0.0643154
P22314	UBA1	1	10	3	1	1	13	129	0	8.09034	3.37874	0	0	0.463211	0.968525	0.963763	0.456852	0.47651	1.93229	0	0	0	0	0	0	0	0.00780383	0.000139198	6.97895e-05	0.405602	0.860996	0.349585	0.238589
P14625	HSP90B1	5	8	1	0	0	12	137	5.61962	5.74908	0	0	0	0.9759	0.956359	0.471603	0.456852	0.47651	1.93226	0	0	0	0	0	0	0	0.00069634	0.000556793	0.000418737	0.405602	0.667012	0.660788	0.595436
P25789	PSMA4	2	7	3	2	1	10	87	2.71189	6.27411	4.03666	2.54552	0	0.941754	0.95993	0.972271	0.928252	0.47651	1.9322	0	0	0	0	0	0	0	0.000146231	0.000194878	9.77053e-05	0.405602	0.330913	0.409751	0.289419
O00159	MYO1C	1	9	2	3	4	17	175	0	5.77669	1.91853	2.60034	5.8527	0.463211	0.956562	0.946719	0.929849	0.97561	1.93217	0	0	0	0	0	0	0	0.000208902	0.000250557	0.000502485	0.405602	0.390041	0.467842	0.654564
Q9GZR7	DDX24	0	4	0	7	2	12	113	0	2.63811	0	8.53328	3.53866	0.463211	0.882404	0.471603	0.97137	0.960569	1.93194	0	0	0	0	0	0	0	0.000104451	4.17595e-05	0	0.405602	0.260373	0.156639	0.0643154
Q8NBP7	PCSK9	3	4	0	0	0	5	28	5.94797	5.55319	0	0	0	0.977642	0.954268	0.471603	0.456852	0.47651	1.93191	0	0	0	0	0	0	0	0	0	0	0.405602	0.0207469	0.0497925	0.0643154
P53041	PPP5C	3	6	3	1	1	12	93	3.85282	4.9707	3.92401	0	0	0.960308	0.947096	0.971545	0.456852	0.47651	1.93185	0	0	0	0	0	0	0	0.00030639	0.00076559	0.000460611	0.405602	0.477178	0.73444	0.622407
Q96CW5	TUBGCP3	0	7	0	8	2	15	124	0	5.10854	0	9.65466	3.42013	0.463211	0.949042	0.471603	0.972358	0.959408	1.93177	0	0	0	0	0	0	0	0.000146231	0.000389755	0.000390821	0.405602	0.330913	0.584025	0.570539
P62979	RPS27A	1	4	0	9	2	16	139	0	2.25371	0	10.6573	3.27503	0.463211	0.864547	0.471603	0.973142	0.958537	1.93168	0	0	0	0	0	0	0	4.87438e-05	4.17595e-05	0.000125621	0.405602	0.139004	0.156639	0.34751
Q9NUX5	POT1	2	5	4	5	0	15	184	1.81146	2.40286	3.85153	4.54344	0	0.92982	0.871138	0.970616	0.960714	0.47651	1.93133	0	0	0	0	0	0	0	0.000139268	6.95991e-05	0	0.405602	0.315353	0.208506	0.0643154
Q16288	NTRK3	1	3	1	3	2	8	49	0	3.17517	0	4.71961	4.62216	0.463211	0.904733	0.471603	0.962195	0.969019	1.93121	0	0	0	0	0	0	0	1.39268e-05	2.78396e-05	5.58316e-05	0.405602	0.0612033	0.131743	0.219917
Q96BK5	PINX1	1	9	1	3	2	13	95	0	8.28984	0	3.59094	3.76116	0.463211	0.969077	0.471603	0.9473	0.962137	1.93121	0	0	0	0	0	0	0	0.00119074	0	0	0.405602	0.764523	0.0497925	0.0643154
Q96CW1	AP2M1	3	9	5	4	2	20	217	2.47662	4.94558	4.58341	3.16238	2.71637	0.938153	0.946922	0.975436	0.940592	0.955517	1.93095	0	0	0	0	0	0	0	0.00038995	0.000334076	0.000781643	0.405602	0.553942	0.542531	0.748963
P02545	LMNA	2	12	2	5	0	17	184	1.81146	8.46694	1.8602	4.54344	0	0.92982	0.969919	0.9464	0.960714	0.47651	1.93063	0	1	0	0	0	1	0.135557	0.0191319	0.0178065	0.0131385	0.993776	0.939834	0.931535	0.912863
Q8N3V7	SYNPO	2	11	3	3	1	18	150	2.05009	8.46359	3.13201	2.84461	0	0.931446	0.969861	0.960685	0.933798	0.47651	1.93055	0	0	0	0	0	0	0	0.000250682	8.35189e-05	8.37474e-05	0.405602	0.426349	0.239627	0.26556
P08754	GNAI3	1	7	1	1	3	12	100	0	5.80955	0	0	5.31579	0.463211	0.956998	0.471603	0.456852	0.973374	1.93037	0	0	0	0	0	0	0	8.35608e-05	0.000167038	8.37474e-05	0.405602	0.223029	0.385892	0.26556
Q15428	SF3A2	1	9	1	3	2	12	99	0	8.11379	0	3.52234	3.70815	0.463211	0.968612	0.471603	0.946341	0.961702	1.93031	0	0	0	0	0	0	0	6.9634e-05	0	2.79158e-05	0.405602	0.19917	0.0497925	0.161826
Q92614	MYO18A	0	8	4	1	2	13	163	0	5.12832	4.09924	0	3.07383	0.463211	0.949245	0.97259	0.456852	0.957433	1.93002	0	0	0	0	0	0	0	0.000139268	0	0.000139579	0.405602	0.315353	0.0497925	0.375519
P39656	DDOST	4	1	0	3	1	7	75	5.64781	0	0	3.98819	0	0.975958	0.412079	0.471603	0.95392	0.47651	1.92988	0	0	0	0	0	0	0	0.000313353	6.95991e-05	0.000139579	0.405602	0.490664	0.208506	0.375519
Q15714	TSC22D1	4	9	2	2	1	16	136	4.38503	6.78853	2.21712	2.00657	0	0.966783	0.962892	0.949158	0.919019	0.47651	1.92967	0	0	0	0	0	0	0	2.08902e-05	0	0	0.405602	0.0767635	0.0497925	0.0643154
P62191	PSMC1	4	4	3	1	0	10	136	4.38503	2.29343	3.29194	0	0	0.966783	0.866899	0.962747	0.456852	0.47651	1.92953	0	1	0	0	0	1	0	0.000278536	0.000222717	0.00033499	0.405602	0.448133	0.440871	0.526971
Q00610	CLTC	5	17	2	5	0	26	306	3.65629	10.2412	1.29407	3.3356	0	0.956911	0.972416	0.943728	0.944019	0.47651	1.92933	0	0	0	0	0	0	0.00431862	0.00112807	0.000626392	0.000879348	0.892116	0.756224	0.684647	0.764523
P35222	CTNNB1	3	14	5	3	1	19	340	1.80255	6.93155	3.51161	1.60992	0	0.929733	0.963415	0.965563	0.915796	0.47651	1.92898	0	0	0	0	0	0	0.00575816	0.0167655	0.0359542	0.00150745	0.919087	0.923237	0.975104	0.823651
Q04837	SSBP1	1	4	1	3	3	8	76	0	3.41485	0	3.96576	5.79323	0.463211	0.913269	0.471603	0.953717	0.975203	1.92892	0	0	0	0	0	0	0	0.000111414	0.000167038	0.000111663	0.405602	0.279046	0.385892	0.313278
P18206	VCL	0	6	3	1	2	11	110	0	4.49428	3.64266	0	3.57307	0.463211	0.939141	0.967712	0.456852	0.960918	1.92863	0	0	0	0	0	0	0	0.000438694	0.000682071	0.000488527	0.405602	0.574689	0.713693	0.634855
O00232	PSMD12	2	7	3	0	0	10	97	2.5772	5.91046	3.85314	0	0	0.939634	0.957753	0.970703	0.456852	0.47651	1.92846	0	0	0	0	0	0	0	0.000104451	6.95991e-05	6.97895e-05	0.405602	0.260373	0.208506	0.238589
Q99816	TSG101	5	6	2	5	1	14	201	4.6649	2.88834	1.75839	4.32851	0	0.969338	0.894454	0.945877	0.958711	0.47651	1.92805	0	0	0	0	0	0	0	0.000104451	0.000125278	8.37474e-05	0.405602	0.260373	0.322614	0.26556
P52294	KPNA1	1	10	2	3	1	13	89	0	9.83291	2.7359	3.6999	0	0.463211	0.972009	0.955807	0.949535	0.47651	1.92782	0	0	0	0	0	0	0.00239923	0.000243719	0.000278396	0.000139579	0.855809	0.415975	0.491701	0.375519
P22492	HIST1H1T	0	4	0	3	2	7	56	0	4.04293	0	4.48802	4.447	0.463211	0.930517	0.471603	0.960279	0.967276	1.92756	0	0	0	0	0	0	0	1.39268e-05	5.56793e-05	2.79158e-05	0.405602	0.0612033	0.18361	0.161826
P61978	HNRNPK	1	13	2	5	3	20	264	0	7.48416	1.45302	3.67834	3.66606	0.463211	0.965912	0.944599	0.949274	0.961208	1.92712	0	1	1	0	0	2	0.00431862	0.00137875	0.00100223	0.000753727	0.892116	0.771784	0.767635	0.743776
P29692	EEF1D	0	10	3	2	0	13	147	0	7.49636	3.16488	1.91537	0	0.463211	0.966057	0.961034	0.918002	0.47651	1.92709	0	1	0	0	0	1	0	0.000501365	0.000334076	0.000502485	0.405602	0.599585	0.542531	0.654564
Q9UKE5	TNIK	2	6	3	2	2	12	114	2.37944	4.39437	3.58322	2.21656	3.5274	0.936295	0.937602	0.966667	0.922329	0.960308	1.92697	0	0	0	0	0	0	0	1.39268e-05	1.39198e-05	0	0.405602	0.0612033	0.107884	0.0643154
P25786	PSMA1	6	5	3	1	0	12	230	5.43252	1.94495	2.45233	0	0	0.974623	0.851974	0.951916	0.456852	0.47651	1.92654	0	0	0	0	0	0	0	0.000501365	0.000222717	0.00033499	0.405602	0.599585	0.440871	0.526971
P25787	PSMA2	2	8	3	2	1	12	117	2.34789	6.32676	3.54009	2.18539	0	0.935598	0.960627	0.965796	0.921429	0.47651	1.92642	0	0	0	0	0	0	0	0.000417804	0.000334076	0	0.405602	0.565353	0.542531	0.0643154
Q99615	DNAJC7	2	4	3	1	2	8	116	2.35831	2.58859	3.55434	0	3.50519	0.935889	0.880749	0.966057	0.456852	0.959901	1.92596	0	0	0	0	0	0	0	0.000438694	0.000250557	0.000502485	0.405602	0.574689	0.467842	0.654564
P04264	KRT1	3	3	0	5	0	10	101	3.71444	2.03112	0	6.04653	0	0.958014	0.85482	0.471603	0.967538	0.47651	1.92555	0	0	0	0	0	0	0	0.000243719	0.000278396	0.000558316	0.405602	0.415975	0.491701	0.675311
Q8TAP6	CEP76	1	4	1	7	2	12	185	0	1.75267	0	6.85494	2.915	0.463211	0.844135	0.471603	0.96899	0.956475	1.92546	0	0	0	0	0	0	0	5.57072e-05	0.000111359	0.000167495	0.405602	0.160788	0.288382	0.400415
Q15365	PCBP1	3	11	1	4	2	18	167	2.89015	7.93459	0	3.68376	3.04334	0.943961	0.96806	0.471603	0.949419	0.957201	1.92526	0	0	0	0	0	0	0	0.000682413	0.000584633	0.000390821	0.405602	0.661826	0.671162	0.570539
P27105	STOM	1	10	3	3	0	15	154	0	7.28734	3.08929	2.80261	0	0.463211	0.964925	0.960105	0.932811	0.47651	1.92503	0	0	0	0	0	0	0	0.000167122	0.000250557	0.000251242	0.405602	0.350622	0.467842	0.479253
P22681	CBL	5	10	3	5	3	24	260	4.04174	5.03718	2.26383	3.71418	3.69144	0.963182	0.948316	0.949564	0.949942	0.96144	1.92462	0	0	0	0	0	0	0.00335893	0.0166361	0.0238788	0.38698	0.870332	0.921162	0.950207	0.997925
Q96EB6	SIRT1	3	6	4	2	2	10	201	2.59623	2.88834	3.6726	1.55846	2.8115	0.939954	0.894454	0.968235	0.915592	0.956069	1.9243	0	0	0	0	0	0	0	0.000139268	0.000111359	0	0.405602	0.315353	0.288382	0.0643154
Q8IVT2	MISP	3	4	2	1	0	7	73	4.26324	3.49629	2.98413	0	0	0.965128	0.916434	0.959088	0.456852	0.47651	1.92422	0	0	0	0	0	0	0	0.00267588	5.56793e-05	2.79158e-05	0.405602	0.807054	0.18361	0.161826
O94966	USP19	3	5	2	1	1	9	73	4.26324	4.54894	2.98413	0	0	0.965128	0.940447	0.959088	0.456852	0.47651	1.92422	0	0	0	0	0	0	0.000479846	0.00366564	0.00486485	0.00117246	0.813278	0.823651	0.869295	0.798755
Q15628	TRADD	3	5	1	3	1	9	67	4.4101	4.76353	0	4.18005	0	0.966986	0.944454	0.471603	0.956765	0.47651	1.92375	0	0	0	0	0	0	0	3.4817e-05	6.95991e-05	0.000139579	0.405602	0.102697	0.208506	0.375519
P42566	EPS15	3	7	3	5	0	16	156	2.9997	4.3846	3.06838	4.9498	0	0.946196	0.937282	0.959872	0.963676	0.47651	1.92355	0	0	0	0	0	0	0	0.000557072	0.000334076	0.000669979	0.405602	0.616183	0.542531	0.711618
Q9Y6K9	IKBKG	4	10	3	8	3	25	382	2.34841	3.53407	1.69677	5.44659	3.05947	0.935656	0.917189	0.945528	0.96597	0.957375	1.92334	0	0	0	0	0	0	0	0.00100273	0.00155902	0.00156329	0.405602	0.743776	0.819502	0.827801
P21860	ERBB3	4	3	0	3	2	10	145	4.25218	1.51262	0	2.8989	3.22151	0.965041	0.835366	0.471603	0.934959	0.958188	1.92323	0	0	0	0	0	0	0	0.000417804	0.000556793	0.0240159	0.405602	0.565353	0.660788	0.948133
Q9NXB0	MKS1	3	6	1	0	0	8	70	4.335	5.80101	0	0	0	0.966086	0.956823	0.471603	0.456852	0.47651	1.92291	0	0	0	0	0	0	0	0	5.56793e-05	0	0.405602	0.0207469	0.18361	0.0643154
P06733	ENO1	2	9	3	3	0	16	148	2.06598	6.44497	3.15384	2.86609	0	0.931707	0.961614	0.960976	0.934088	0.47651	1.92259	1	0	0	0	0	1	0	0.0121091	0.00077951	0.000390821	0.405602	0.890041	0.740664	0.570539
Q13310	PABPC4	0	7	1	8	1	15	120	0	5.21404	0	9.78294	0	0.463211	0.950058	0.471603	0.972474	0.47651	1.92253	0	0	0	0	0	0	0	0.000250682	0.000208797	8.37474e-05	0.405602	0.426349	0.420124	0.26556
P17980	PSMC3	4	4	3	0	0	9	163	4.01135	1.9699	2.99745	0	0	0.962892	0.852613	0.95935	0.456852	0.47651	1.92224	0	1	0	0	0	1	0	0.000334243	0.000250557	0.000167495	0.405602	0.504149	0.467842	0.400415
Q01201	RELB	0	4	2	4	1	8	80	0	3.31176	2.86903	5.21784	0	0.463211	0.909727	0.957317	0.964866	0.47651	1.92218	0	0	0	0	0	0	0	0	0	0.000209369	0.405602	0.0207469	0.0497925	0.437759
Q08380	LGALS3BP	1	7	2	5	2	16	152	0	4.46516	2.08435	5.01428	3.16191	0.463211	0.938647	0.947851	0.964053	0.95784	1.92189	0	0	0	0	0	0	0	0.000626706	0.000417595	0.000977053	0.405602	0.637967	0.603734	0.78112
Q16186	ADRM1	3	5	2	1	0	9	78	4.15032	4.38474	2.90079	0	0	0.963705	0.937398	0.957724	0.456852	0.47651	1.92143	0	0	1	0	0	1	0	3.4817e-05	0.000139198	0.000139579	0.405602	0.102697	0.349585	0.375519
P21980	TGM2	3	6	3	2	0	13	115	3.4984	4.37003	3.56871	2.20607	0	0.954791	0.936469	0.966173	0.922038	0.47651	1.92096	0	0	0	0	0	0	0	0.000292463	0.0157777	0.00033499	0.405602	0.46473	0.923237	0.526971
Q9UKB1	FBXW11	1	13	3	3	3	18	317	0	6.50469	1.96659	1.7085	3.36378	0.463211	0.961789	0.94698	0.916434	0.959001	1.92079	0	0	0	0	0	0	0.00191939	0.000167122	0.000111359	0.000111663	0.842324	0.350622	0.288382	0.313278
Q8IYB3	SRRM1	2	7	0	5	0	12	109	2.4341	5.52623	0	5.85166	0	0.937311	0.953775	0.471603	0.966957	0.47651	1.92073	0	0	0	0	0	0	0.00143954	6.26706e-05	4.17595e-05	4.18737e-05	0.827801	0.18361	0.156639	0.196058
P04792	HSPB1	2	14	2	3	3	22	353	1.10253	6.72093	1.14529	1.55781	3.18777	0.926655	0.96266	0.943467	0.915505	0.958014	1.92067	0	0	0	0	0	0	0.0071977	0.019311	0.0193098	0.022784	0.941909	0.941909	0.939834	0.939834
O60506	SYNCRIP	1	14	3	3	1	17	252	0	8.66815	2.31157	2.04218	0	0.463211	0.970296	0.950116	0.919396	0.47651	1.92041	0	0	0	0	0	0	0	0.000313353	0.000125278	0.000209369	0.405602	0.490664	0.322614	0.437759
P50402	EMD	4	6	3	2	1	12	167	3.96175	3.36223	2.9584	1.76782	0	0.961876	0.911324	0.958449	0.916899	0.47651	1.92033	0	0	0	0	0	0	0.00527831	0.0119877	0.0169295	0.0107062	0.907676	0.885892	0.929461	0.90249
P28066	PSMA5	3	6	3	1	0	11	116	3.48406	4.34592	3.55434	0	0	0.954065	0.936092	0.966057	0.456852	0.47651	1.92012	0	0	0	0	0	0	0	0.000341207	0.000292316	0.000195411	0.405602	0.514523	0.509336	0.419087
P17066	HSPA6	3	4	0	2	2	8	100	3.73108	2.8722	0	2.37501	3.69524	0.958101	0.893322	0.471603	0.924593	0.961556	1.91966	0	0	0	0	0	0	0.00239923	0.00870404	0.00912078	0.0144123	0.855809	0.86722	0.894191	0.914938
P54727	RAD23B	0	7	3	0	0	8	113	0	5.40872	3.59787	0	0	0.463211	0.952671	0.966899	0.456852	0.47651	1.91957	0	0	0	0	0	0	0	0.000104451	0.000139198	6.97895e-05	0.405602	0.260373	0.349585	0.238589
Q15691	MAPRE1	2	10	2	3	2	18	179	1.84327	6.62094	1.8922	2.5649	2.95626	0.93011	0.962195	0.946603	0.928949	0.956707	1.9189	0	0	0	0	0	0	0	0.000814718	0.000501114	0.000753727	0.405602	0.702282	0.646266	0.743776
P48039	MTNR1A	2	8	3	3	1	14	138	2.14918	5.72276	3.26803	2.97849	0	0.93284	0.956214	0.962398	0.936934	0.47651	1.91861	0	0	0	0	0	0	0	0.000376024	0.000250557	0.000125621	0.405602	0.538382	0.467842	0.34751
O15372	EIF3H	0	5	2	3	2	10	90	0	4.03483	2.72201	3.6812	3.83077	0.463211	0.930285	0.955517	0.949361	0.96295	1.91847	0	0	0	0	0	0	0	0.000111414	5.56793e-05	0	0.405602	0.279046	0.18361	0.0643154
Q15287	RNPS1	0	7	1	5	2	14	177	0	3.99824	0	4.63836	2.97034	0.463211	0.92921	0.471603	0.96144	0.956882	1.91832	0	0	0	0	0	0	0	6.26706e-05	8.35189e-05	0	0.405602	0.18361	0.239627	0.0643154
Q14254	FLOT2	1	3	2	3	0	8	66	0	2.68973	3.11161	4.20574	0	0.463211	0.884901	0.960511	0.957375	0.47651	1.91789	0	0	0	0	0	0	0.00191939	0.00621018	0.00333721	0.00485063	0.842324	0.848548	0.860996	0.875519
P07355	ANXA2	1	6	2	5	1	13	120	0	4.25184	2.36829	5.60737	0	0.463211	0.934727	0.950929	0.966609	0.47651	1.91754	0	0	0	0	0	0	0	0.00111414	0.00077951	0.00100497	0.405602	0.753112	0.740664	0.78527
Q02539	HIST1H1A	0	4	0	4	2	9	123	0	2.47875	0	4.31024	3.43045	0.463211	0.876365	0.471603	0.958072	0.959466	1.91754	0	0	0	1	0	1	0	1.39268e-05	2.78396e-05	4.18737e-05	0.405602	0.0612033	0.131743	0.196058
P61981	YWHAG	6	12	3	3	3	22	404	3.86489	4.58254	1.6179	1.37469	2.96898	0.960395	0.941405	0.945006	0.914866	0.956794	1.91719	0	0	0	0	0	0	0	0.00069634	0.00125278	0.00125621	0.405602	0.667012	0.790456	0.808091
Q15599	SLC9A3R2	3	2	3	0	1	6	124	3.37397	1.09468	3.44392	0	0	0.952381	0.82892	0.964721	0.456852	0.47651	1.9171	0	0	0	0	0	0	0.000959693	0.13374	0.218805	0.00247417	0.818465	0.985477	0.991701	0.858921
P10412	HIST1H1E	0	3	0	3	2	5	82	0	2.34804	0	3.83745	3.95092	0.463211	0.868031	0.471603	0.952265	0.963937	1.9162	0	0	0	0	0	0	0	0.000125341	0.000125278	0.000209369	0.405602	0.29668	0.322614	0.437759
O95425	SVIL	0	3	2	3	2	8	96	0	2.10724	2.64196	3.5735	3.74769	0.463211	0.857927	0.954123	0.947154	0.96205	1.91617	0	0	0	0	0	0	0.00191939	0.00643204	0.00408889	0.00407933	0.842324	0.850622	0.86722	0.865145
P49792	RANBP2	1	9	2	3	1	12	120	0	7.30443	2.36829	3.20539	0	0.463211	0.964983	0.950929	0.941347	0.47651	1.91591	0	0	0	0	0	0	0.746161	0.000222829	0.000111359	0.000111663	1	0.40249	0.288382	0.313278
P68363	TUBA1B	2	5	1	4	2	13	131	2.21149	3.15117	0	4.17976	3.35027	0.933682	0.904007	0.471603	0.956678	0.958943	1.91562	0	0	0	0	0	0	0	0.00038995	0.000222717	0.0012283	0.405602	0.553942	0.440871	0.802905
Q9Y575	ASB3	0	5	0	3	1	6	51	0	5.46084	0	4.65002	0	0.463211	0.953281	0.471603	0.961614	0.47651	1.9149	0	0	0	0	0	0	0	0	0	0	0.405602	0.0207469	0.0497925	0.0643154
P42858	HTT	5	7	2	1	2	15	279	3.87392	2.69137	1.39294	0	2.40752	0.960453	0.88525	0.944367	0.456852	0.954065	1.91452	0	0	0	0	0	0	0	0.00880153	0.000389755	0.000488527	0.405602	0.869295	0.584025	0.634855
P12956	XRCC6	1	12	3	2	1	16	244	0	7.00612	2.36107	1.34676	0	0.463211	0.963647	0.950813	0.914721	0.47651	1.91446	0	0	0	0	0	0	0.00911708	0.0179532	0.0150714	0.0154312	0.970954	0.927386	0.917012	0.921162
Q14978	NOLC1	1	3	1	3	2	8	86	0	2.27459	0	3.75738	3.8894	0.463211	0.865883	0.471603	0.950639	0.963676	1.91431	0	0	0	0	0	0	0	0.00307879	2.78396e-05	1.39579e-05	0.405602	0.817427	0.131743	0.133817
O43242	PSMD3	3	4	3	1	0	9	132	3.2713	2.34808	3.34093	0	0	0.951045	0.868177	0.963182	0.456852	0.47651	1.91423	0	0	0	0	0	0	0	0.000334243	0.000222717	0.00033499	0.405602	0.504149	0.440871	0.526971
O00308	WWP2	3	9	3	2	0	13	176	2.80628	5.75427	2.87417	1.70789	0	0.943235	0.956446	0.957375	0.916347	0.47651	1.91382	0	0	0	0	0	0	0	8.35608e-05	0.000278396	0	0.405602	0.223029	0.491701	0.0643154
P18754	RCC1	2	4	2	3	0	9	73	2.9313	3.49629	2.98413	4.03403	0	0.944948	0.916434	0.959088	0.954646	0.47651	1.91373	0	0	0	0	0	0	0.000959693	8.35608e-05	0	5.58316e-05	0.818465	0.223029	0.0497925	0.219917
Q9Y230	RUVBL2	0	7	0	5	2	13	209	0	3.50435	0	4.2342	2.76297	0.463211	0.916609	0.471603	0.957607	0.95572	1.91333	0	1	0	0	0	1	0	0.000591889	0.000347996	0.000488527	0.405602	0.629668	0.56639	0.634855
Q16665	HIF1A	2	8	0	3	2	13	144	2.09849	5.56936	0	2.91001	3.23027	0.932027	0.954733	0.471603	0.935453	0.958246	1.91298	0	0	0	0	0	0	0	0.000445658	0.000334076	0.000223326	0.405602	0.579876	0.542531	0.461618
P54725	RAD23A	3	8	3	1	0	13	153	3.03105	5.35254	3.09986	0	0	0.946748	0.952236	0.960337	0.456852	0.47651	1.91257	0	0	0	0	0	0	0	0.000125341	0	0	0.405602	0.29668	0.0497925	0.0643154
Q15796	SMAD2	5	9	2	4	2	15	295	3.74224	3.8202	1.33301	2.57339	2.33976	0.958479	0.923926	0.943902	0.929094	0.953833	1.91231	0	0	0	0	0	0	0	8.35608e-05	0.000125278	4.18737e-05	0.405602	0.223029	0.322614	0.196058
Q9Y265	RUVBL1	0	9	1	3	2	14	185	0	5.55897	0	2.51339	2.915	0.463211	0.95453	0.471603	0.927642	0.956475	1.911	0	1	0	0	0	1	0	0.000877388	0.000501114	0.000879348	0.405602	0.71888	0.646266	0.764523
Q9UBQ5	EIF3K	0	5	1	3	1	8	56	0	5.21936	0	4.48802	0	0.463211	0.950203	0.471603	0.960279	0.47651	1.91048	0	0	0	0	0	0	0	9.74876e-05	5.56793e-05	0.000111663	0.405602	0.244813	0.18361	0.313278
Q9UKV5	AMFR	3	5	2	0	0	8	104	3.66555	3.68831	2.54322	0	0	0.957027	0.921196	0.953078	0.456852	0.47651	1.9101	0	0	0	0	0	0	0.00191939	0.00528212	0.00761744	0.00188432	0.842324	0.8361	0.887967	0.842324
P62736	ACTA2	2	6	0	4	2	13	154	2.01901	3.57544	0	3.84807	3.14541	0.931069	0.91838	0.471603	0.952323	0.957753	1.91008	0	0	0	0	0	0	0	0.000174085	0.000208797	0.000139579	0.405602	0.368257	0.420124	0.375519
Q15149	PLEC	0	3	2	4	1	8	119	0	1.79054	2.37846	4.37896	0	0.463211	0.846167	0.951045	0.959001	0.47651	1.91005	0	0	0	0	0	0	0	0.000584926	0.000584633	0.000586232	0.405602	0.623444	0.671162	0.685685
Q16666	IFI16	3	11	2	1	2	17	272	2.13119	5.6383	1.42048	0	2.4385	0.932404	0.955343	0.944425	0.456852	0.954181	1.90952	0	0	0	0	0	0	0	8.35608e-05	4.17595e-05	4.18737e-05	0.405602	0.223029	0.156639	0.196058
P28482	MAPK1	4	11	0	3	2	16	272	2.98923	5.6383	0	1.92942	2.4385	0.946109	0.955343	0.471603	0.918206	0.954181	1.90952	0	0	0	0	0	0	0	0.000278536	0.000167038	0.000390821	0.405602	0.448133	0.385892	0.570539
Q7Z3Y8	KRT27	3	0	0	4	1	8	127	3.33465	0	0	4.24389	0	0.951626	0.412079	0.471603	0.957666	0.47651	1.90929	0	0	0	0	0	0	0	0	0	0	0.405602	0.0207469	0.0497925	0.0643154
P37802	TAGLN2	3	3	2	2	0	9	106	3.63378	1.95938	2.51982	2.3043	0	0.956562	0.852497	0.952729	0.923868	0.47651	1.90929	0	1	0	0	0	1	0	0.0089408	0.000389755	0.000390821	0.405602	0.871369	0.584025	0.570539
P10599	TXN	3	7	0	0	0	9	111	3.55711	5.46687	0	0	0	0.955865	0.953426	0.471603	0.456852	0.47651	1.90929	0	0	0	0	0	0	0	0.00038995	0.000222717	0.000111663	0.405602	0.553942	0.440871	0.313278
P48431	SOX2	4	11	2	0	1	15	246	3.18512	6.09544	1.53073	0	0	0.95	0.958769	0.944832	0.456852	0.47651	1.90877	0	0	0	0	0	0	0	0.000139268	0.000111359	0.000167495	0.405602	0.315353	0.288382	0.400415
Q9UBN7	HDAC6	3	9	3	2	2	15	221	2.44827	4.87651	2.51439	1.45386	2.69375	0.937689	0.945819	0.952671	0.915215	0.955285	1.90796	0	0	0	0	0	0	0.00431862	0.0164253	0.0189062	0.393411	0.892116	0.919087	0.937759	1
P05067	APP	1	25	8	15	2	46	1753	0	2.74451	1.34578	4.00385	0.476982	0.463211	0.888386	0.943961	0.954413	0.95302	1.90743	0	0	0	0	0	0	0	0.00185226	0.00136414	0.0392724	0.405602	0.788382	0.806017	0.970954
P55060	CSE1L	3	7	1	2	0	10	114	3.51287	5.38008	0	2.21656	0	0.954965	0.952439	0.471603	0.922329	0.47651	1.9074	0	0	1	0	0	1	0.006238	0.0122244	0.241292	0.0103433	0.929461	0.894191	0.995851	0.89834
P68366	TUBA4A	3	11	1	2	2	15	285	2.06131	5.42902	0	1.18347	2.38163	0.931649	0.952846	0.471603	0.914286	0.953949	1.90679	0	0	0	0	0	0	0	0.000842571	0.000459354	0.0328688	0.405602	0.715768	0.626556	0.96473
P51617	IRAK1	3	7	0	2	1	10	118	3.45579	5.26831	0	2.1752	0	0.953688	0.950639	0.471603	0.921312	0.47651	1.90433	0	0	0	0	0	0	0	0.000417804	0.000334076	0	0.405602	0.565353	0.542531	0.0643154
P46108	CRK	3	12	3	6	1	25	348	1.76912	5.27078	1.83032	3.89114	0	0.929268	0.950697	0.946341	0.952846	0.47651	1.90354	0	0	0	0	0	0	0	0.000633669	0.0012667	0.00163307	0.405602	0.644191	0.797718	0.83195
P21796	VDAC1	3	3	2	2	0	10	124	3.37397	1.73152	2.32852	2.11598	0	0.952381	0.843583	0.950232	0.920412	0.47651	1.90261	0	0	0	0	0	0	0	0.000313353	0.000139198	0.000209369	0.405602	0.490664	0.349585	0.437759
Q96S59	RANBP9	3	5	2	1	0	10	126	3.34764	3.24025	2.30915	0	0	0.951858	0.907404	0.950029	0.456852	0.47651	1.90189	0	0	0	0	0	0	0	1.39268e-05	1.39198e-05	2.79158e-05	0.405602	0.0612033	0.107884	0.161826
Q99613	EIF3C	0	6	1	3	0	10	85	0	5.2304	0	3.77701	0	0.463211	0.950319	0.471603	0.950813	0.47651	1.90113	0	0	0	0	0	0	0	8.35608e-05	4.17595e-05	4.18737e-05	0.405602	0.223029	0.156639	0.196058
