# Supplementary material for: Network Biology Identifies Novel Regulators of CFTR Trafficking and Membrane Stability
Source: Front Pharmacol. 2019 Jun 4;10:619. doi: 10.3389/fphar.2019.00619 (PMC6559121; doi:10.3389/fphar.2019.00619)
Supplement: Table S2 — Enriched biological processes in the list of strong mediator proteins. [file Table_2.xlsx]

## Sheet: Sheet1
Category	Term	Count	%	PValue	Genes	List Total	Pop Hits	Pop Total	background_freq	Fold Enrichment	Bonferroni	Benjamini	FDR
GOTERM_BP_FAT	GO:0033365~protein localization to organelle	54	28.125	5.85762e-24	HSP90AB1, XPO1, PDIA3, AURKA, CCT2, RPS3, CTNNB1, AKT1, HSPH1, CRY2, RPLP0, MSN, RANBP2, SYK, EGFR, HSP90AA1, TP53, ESR1, IPO9, CCT6A, RPS4X, SLC9A3R1, FLNA, HUWE1, RPS14, IPO5, MDM2, RPS10, RUVBL1, LRRK2, KPNA1, YWHAZ, ARF6, RDX, CDH1, EZR, CSE1L, DNAJA1, OBSL1, HSPA4, HSPA5, FBXW11, EMD, HSPA8, PINX1, DHX9, RPSA, TCP1, LMNA, YWHAG, CCT4, RPL23, YWHAQ, SMURF1	191	902	16650	0.0541742	5.21877	2.84446e-20	9.48153e-21	1.11131e-20
GOTERM_BP_FAT	GO:0031399~regulation of protein modification process	71	36.9792	1.58414e-23	HSP90AB1, COPS5, SNCA, PTEN, IQGAP1, CTNNB1, RPS3, CUL3, AKT1, HSPH1, APP, CRY2, ISG15, TARDBP, PSMD1, PSMD2, SHC1, MYC, CUL1, SYK, EGFR, PRKCA, ICAM1, HSP90AA1, TP53, PRKAB1, SLC9A3R1, STK4, CDK5, CDK2, ADRB2, ARRB2, PSMA3, UBC, RIPK2, HSPB1, LRRK2, DERL1, GNAI2, GRB2, ERBB3, ERBB2, HSPA1A, RACK1, TNFRSF1A, EZR, PSMB1, UBASH3B, NPM1, DNAJA1, HSPA5, PINX1, FN1, NF2, HTT, CBL, SNW1, MAPK10, BRCA1,…	191	1664	16650	0.0999399	3.71951	7.69257e-20	1.53851e-20	3.00543e-20
GOTERM_BP_FAT	GO:0034613~cellular protein localization	69	35.9375	4.97901e-23	HSP90AB1, XPO1, PDIA3, AURKA, CCT2, CLTC, IQGAP1, RPS3, CTNNB1, AKT1, HSPH1, CRY2, RPLP0, RANBP2, MSN, SYK, EGFR, HSP90AA1, FLOT2, TP53, ESR1, IPO9, CCT6A, RPS4X, SLC9A3R1, CDK5, FLNA, HUWE1, RPS14, IPO5, MDM2, RPS10, RUVBL1, LRRK2, KPNA1, YWHAZ, DERL1, ERBB2, ARF6, CDH1, RDX, RACK1, TNFRSF1A, EZR, CSE1L, NPM1, DNAJA1, OBSL1, HSPA4, HSPA5, FBXW11, EMD, HSPA8, PINX1, DHX9, RPSA, TCP1, NF2, LMNA, I…	191	1600	16650	0.0960961	3.75933	2.41781e-19	3.02226e-20	9.44619e-20
GOTERM_BP_FAT	GO:0070727~cellular macromolecule localization	69	35.9375	7.85736e-23	HSP90AB1, XPO1, PDIA3, AURKA, CCT2, CLTC, IQGAP1, RPS3, CTNNB1, AKT1, HSPH1, CRY2, RPLP0, RANBP2, MSN, SYK, EGFR, HSP90AA1, FLOT2, TP53, ESR1, IPO9, CCT6A, RPS4X, SLC9A3R1, CDK5, FLNA, HUWE1, RPS14, IPO5, MDM2, RPS10, RUVBL1, LRRK2, KPNA1, YWHAZ, DERL1, ERBB2, ARF6, CDH1, RDX, RACK1, TNFRSF1A, EZR, CSE1L, NPM1, DNAJA1, OBSL1, HSPA4, HSPA5, FBXW11, EMD, HSPA8, PINX1, DHX9, RPSA, TCP1, NF2, LMNA, I…	191	1613	16650	0.0968769	3.72903	3.81553e-19	4.23948e-20	1.4907e-19
GOTERM_BP_FAT	GO:0051338~regulation of transferase activity	53	27.6042	5.48827e-22	HSP90AB1, SNCA, CCT2, PTEN, IQGAP1, RPS3, CTNNB1, AKT1, CUL3, HSPH1, APP, PSMD1, PSMD2, SHC1, RANBP2, MYC, CUL1, SYK, EGFR, TP53, PRKAB1, SLC9A3R1, STK4, CDK5, CDK2, ADRB2, PSMA3, UBC, HSPB1, RIPK2, LRRK2, GNAI2, ERBB3, ERBB2, RACK1, PSMB1, UBASH3B, NPM1, DNAJA1, HSPA5, PINX1, TCP1, NF2, CBL, MAPK10, YWHAG, CCT4, PSMC4, PSMD11, PSMC2, NTRK1, IKBKG, CRK	191	955	16650	0.0573574	4.83786	2.66511e-18	2.05008e-19	1.04124e-18
GOTERM_BP_FAT	GO:0070647~protein modification by small protein conjugation or removal	54	28.125	2.87208e-21	HSP90AB1, COPS5, AURKA, PTEN, RPS3, CTNNB1, AKT1, CUL3, USP19, CUL2, CUL7, ISG15, PSMD1, PSMD2, FBXO25, RANBP2, CUL1, HSP90AA1, TP53, CDK5, CDK2, SUZ12, ADRB2, ARRB2, HUWE1, PSMA3, UBC, MDM2, RIPK2, CAND1, UCHL3, AMFR, LRRK2, DERL1, HSPA1A, CDC73, HNRNPK, PSMB1, DNAJA1, FBXO6, HSPA5, FBXW11, PINX1, VHL, CBL, BRCA1, VCP, PSMC4, PSMD11, OTUB1, UBA1, PSMC2, SMURF1, HDAC6	191	1032	16650	0.061982	4.56137	1.39468e-17	9.29787e-19	5.44891e-18
GOTERM_BP_FAT	GO:0000278~mitotic cell cycle	52	27.0833	6.3897e-21	AURKA, CLTC, PTEN, RPS3, CTNNB1, AKT1, CUL3, CUL2, APP, CUL7, PSMD1, PSMD2, TUBG1, RANBP2, TUBA1A, CUL1, TUBB3, PRKCA, EGFR, HSP90AA1, TP53, SLC9A3R1, FLNA, CDK2, MCM5, PSMA3, UBC, TUBA4A, MDM2, RUVBL1, CCDC8, RDX, CDC73, RCC1, TUBB, PSMB1, NPM1, OBSL1, PPP2R2B, EMD, FBXW11, PINX1, TUBB4B, HTT, LMNA, SIRT7, MISP, YWHAG, PSMC4, NOLC1, PSMD11, PSMC2	191	968	16650	0.0581381	4.68284	3.10284e-17	1.93927e-18	1.21226e-17
GOTERM_BP_FAT	GO:0051247~positive regulation of protein metabolic process	64	33.3333	8.57364e-21	HSP90AB1, SNCA, RPS6KB2, AURKA, PTEN, IQGAP1, CTNNB1, RPS3, AKT1, HSPH1, APP, PSMD1, PSMD2, SHC1, MSN, MYC, CUL1, SYK, EGFR, PRKCA, ICAM1, RELA, TP53, ESR1, EEF2, MYH9, RPS4X, STK4, CDK5, ADRB2, ARRB2, PSMA3, UBC, RIPK2, HSPB1, MDM2, LRRK2, DERL1, GNAI2, ERBB3, ERBB2, RDX, HSPA1A, RACK1, TNFRSF1A, EZR, HNRNPK, PSMB1, NPM1, HSPA5, FBXW11, FN1, SNW1, MAPK10, BRCA1, ANXA2, VCP, PSMC4, PSMD11, PSMC2,…	191	1508	16650	0.0905706	3.69964	4.16336e-17	2.44904e-18	1.62659e-17
GOTERM_BP_FAT	GO:0009057~macromolecule catabolic process	57	29.6875	1.53501e-20	HSP90AB1, AURKA, PTEN, RPS3, CTNNB1, AKT1, CUL3, USP19, CUL2, CUL7, ISG15, RPLP0, PSMD1, PSMD2, FBXO25, MSN, NOS2, CUL1, EGFR, RELA, TP53, RPS4X, CDK5, FLNA, ARRB2, HUWE1, RPS14, PSMA3, UBC, MDM2, RPS10, UCHL3, AMFR, LRRK2, KPNA1, DERL1, RDX, HSPA1A, RACK1, EZR, PSMB1, FBXO6, HSPA5, FBXW11, RPSA, GABARAPL2, CBL, CAPN1, ANXA2, VCP, PSMC4, RPL23, UBA1, PSMD11, PSMC2, SMURF1, HDAC6	191	1201	16650	0.0721321	4.13726	7.45401e-17	3.92317e-18	2.91223e-17
GOTERM_BP_FAT	GO:0022402~cell cycle process	60	31.25	3.23547e-20	XPO1, AURKA, CLTC, PTEN, RPS3, CTNNB1, AKT1, CUL3, USP19, CUL2, APP, CUL7, PSMD1, PSMD2, TUBG1, RANBP2, TUBA1A, MYC, TUBB3, CUL1, PRKCA, EGFR, HSP90AA1, TP53, PRKAB1, MYH9, CDK5, MCM5, FLNA, CDK2, PSMA3, UBC, TUBA4A, MDM2, RUVBL1, CCDC8, RDX, CDC73, RCC1, TUBB, EZR, PSMB1, NPM1, FBXO6, OBSL1, FBXW11, EMD, PINX1, TUBB4B, HTT, LMNA, SIRT7, MISP, BRCA1, YWHAG, NOLC1, PSMC4, PSMD11, SVIL, PSMC2	191	1357	16650	0.0815015	3.85436	1.57114e-16	7.14156e-18	6.13834e-17
GOTERM_BP_FAT	GO:0032446~protein modification by small protein conjugation	49	25.5208	3.87937e-20	AURKA, PTEN, CTNNB1, RPS3, CUL3, AKT1, CUL2, ISG15, CUL7, PSMD1, PSMD2, FBXO25, RANBP2, CUL1, TP53, CDK5, CDK2, SUZ12, ADRB2, ARRB2, HUWE1, PSMA3, UBC, MDM2, RIPK2, CAND1, AMFR, LRRK2, DERL1, CDC73, HSPA1A, HNRNPK, PSMB1, FBXO6, DNAJA1, HSPA5, FBXW11, PINX1, VHL, CBL, BRCA1, VCP, PSMC4, OTUB1, PSMD11, UBA1, PSMC2, SMURF1, HDAC6	191	887	16650	0.0532733	4.81563	1.88382e-16	8.19053e-18	7.35995e-17
GOTERM_BP_FAT	GO:0044265~cellular macromolecule catabolic process	51	26.5625	5.59549e-20	HSP90AB1, AURKA, PTEN, RPS3, CTNNB1, AKT1, CUL3, USP19, CUL2, CUL7, ISG15, RPLP0, PSMD1, PSMD2, FBXO25, MSN, CUL1, TP53, RPS4X, ARRB2, HUWE1, RPS14, PSMA3, UBC, MDM2, RPS10, UCHL3, AMFR, LRRK2, KPNA1, DERL1, RDX, HSPA1A, RACK1, EZR, PSMB1, FBXO6, HSPA5, FBXW11, RPSA, GABARAPL2, CBL, ANXA2, VCP, PSMC4, RPL23, PSMD11, UBA1, PSMC2, SMURF1, HDAC6	191	976	16650	0.0586186	4.55513	2.71717e-16	1.04507e-17	1.06158e-16
GOTERM_BP_FAT	GO:0032270~positive regulation of cellular protein metabolic process	61	31.7708	5.70004e-20	HSP90AB1, SNCA, RPS6KB2, AURKA, PTEN, IQGAP1, CTNNB1, RPS3, AKT1, HSPH1, APP, PSMD1, PSMD2, SHC1, MSN, MYC, CUL1, SYK, PRKCA, EGFR, ICAM1, TP53, ESR1, EEF2, MYH9, RPS4X, STK4, CDK5, ADRB2, ARRB2, PSMA3, UBC, RIPK2, MDM2, LRRK2, DERL1, GNAI2, ERBB3, ERBB2, RDX, HSPA1A, RACK1, TNFRSF1A, EZR, PSMB1, NPM1, HSPA5, FBXW11, FN1, SNW1, MAPK10, BRCA1, ANXA2, VCP, PSMC4, PSMD11, PSMC2, NTRK1, IKBKG, SMURF1…	191	1420	16650	0.0852853	3.74475	2.76794e-16	1.02516e-17	1.08141e-16
GOTERM_BP_FAT	GO:0051248~negative regulation of protein metabolic process	52	27.0833	2.07535e-19	HSP90AB1, SNCA, NFKB1, PTEN, RPS3, CTNNB1, AKT1, CUL3, USP19, HSPH1, APP, CRY2, ISG15, TARDBP, PSMD1, PSMD2, NOS2, MYC, EGFR, FLOT2, RELA, ESR1, SLC9A3R1, CDK5, FLNA, CDK2, ARRB2, PSMA3, UBC, HSPB1, MDM2, LRRK2, HSPA1A, RACK1, EZR, PSMB1, UBASH3B, NPM1, DNAJA1, GAPDH, PINX1, GABARAPL2, NF2, CBL, BRCA1, ANXA2, YWHAG, PSMC4, PSMD11, OTUB1, PSMC2, HDAC6	191	1049	16650	0.063003	4.32124	1.00779e-15	3.05391e-17	3.93737e-16
GOTERM_BP_FAT	GO:1903047~mitotic cell cycle process	47	24.4792	1.67487e-18	AURKA, CDC73, RDX, CLTC, RCC1, PTEN, RPS3, CUL3, AKT1, CUL2, TUBB, APP, PSMB1, CUL7, PSMD1, NPM1, PSMD2, TUBG1, RANBP2, TUBA1A, EMD, FBXW11, TUBB3, CUL1, TUBB4B, PINX1, PRKCA, EGFR, HSP90AA1, HTT, TP53, LMNA, SIRT7, MISP, MCM5, CDK2, FLNA, YWHAG, PSMC4, NOLC1, PSMD11, PSMC2, PSMA3, UBC, MDM2, TUBA4A, RUVBL1	191	890	16650	0.0534535	4.60351	8.13317e-15	1.9837e-16	3.17757e-15
GOTERM_BP_FAT	GO:0046907~intracellular transport	62	32.2917	3.2925e-18	HSP90AB1, XPO1, PDIA3, CLTC, RPS3, CTNNB1, CUL3, AKT1, APP, CRY2, RPLP0, SRRM1, MSN, RANBP2, TUBA1A, TUBA1B, TUBA1C, SYK, EGFR, HSP90AA1, TP53, IPO9, RPS4X, SLC9A3R1, CDK5, FLNA, ADRB2, HUWE1, RPS14, IPO5, UBC, MDM2, RPS10, RUVBL1, LRRK2, KPNA1, YWHAZ, DERL1, ERBB2, CDH1, RDX, TUBB, EZR, CSE1L, NPM1, HSPA4, FBXW11, EMD, HSPA8, RPSA, HTT, LMNA, HNRNPA1, GABARAP, ANXA2, YWHAG, VCP, RPL23, YWHAQ, SM…	191	1594	16650	0.0957357	3.39066	1.59884e-14	3.47574e-16	6.24654e-15
GOTERM_BP_FAT	GO:0044403~symbiosis, encompassing mutualism through parasitism	49	25.5208	4.70439e-18	HSP90AB1, XPO1, DERL1, GRB2, XRCC6, HSPA1A, RCC1, STAU1, RPS3, RACK1, VCAM1, TNFRSF1A, CUL2, HNRNPK, PSMB1, CUL7, ISG15, TARDBP, RPLP0, KRT8, NPM1, SHC1, RANBP2, MYC, CUL1, HSPA8, SYK, ENO1, ICAM1, RPSA, TCP1, RELA, TP53, SNW1, RPS4X, HNRNPA1, IKBKE, RPL23, VCP, RPS14, PSMC2, PSMA3, IPO5, IKBKG, UBC, MDM2, HSPB1, RPS10, KPNA1	191	998	16650	0.0599399	4.28003	2.28445e-14	4.86053e-16	8.92518e-15
GOTERM_BP_FAT	GO:0044419~interspecies interaction between organisms	49	25.5208	4.70439e-18	HSP90AB1, XPO1, DERL1, GRB2, XRCC6, HSPA1A, RCC1, STAU1, RPS3, RACK1, VCAM1, TNFRSF1A, CUL2, HNRNPK, PSMB1, CUL7, ISG15, TARDBP, RPLP0, KRT8, NPM1, SHC1, RANBP2, MYC, CUL1, HSPA8, SYK, ENO1, ICAM1, RPSA, TCP1, RELA, TP53, SNW1, RPS4X, HNRNPA1, IKBKE, RPL23, VCP, RPS14, PSMC2, PSMA3, IPO5, IKBKG, UBC, MDM2, HSPB1, RPS10, KPNA1	191	998	16650	0.0599399	4.28003	2.28445e-14	4.86053e-16	8.92518e-15
GOTERM_BP_FAT	GO:0016032~viral process	48	25	7.19373e-18	HSP90AB1, XPO1, DERL1, GRB2, XRCC6, HSPA1A, RCC1, STAU1, RPS3, RACK1, VCAM1, CUL2, TNFRSF1A, HNRNPK, CUL7, PSMB1, ISG15, RPLP0, TARDBP, KRT8, NPM1, SHC1, RANBP2, MYC, HSPA8, CUL1, ENO1, SYK, ICAM1, RPSA, RELA, TP53, SNW1, RPS4X, HNRNPA1, IKBKE, RPL23, VCP, RPS14, PSMC2, PSMA3, IPO5, IKBKG, UBC, MDM2, HSPB1, RPS10, KPNA1	191	966	16650	0.058018	4.33157	3.49328e-14	7.27766e-16	1.3648e-14
GOTERM_BP_FAT	GO:0044764~multi-organism cellular process	48	25	9.55201e-18	HSP90AB1, XPO1, DERL1, GRB2, XRCC6, HSPA1A, RCC1, STAU1, RPS3, RACK1, VCAM1, CUL2, TNFRSF1A, HNRNPK, CUL7, PSMB1, ISG15, RPLP0, TARDBP, KRT8, NPM1, SHC1, RANBP2, MYC, HSPA8, CUL1, ENO1, SYK, ICAM1, RPSA, RELA, TP53, SNW1, RPS4X, HNRNPA1, IKBKE, RPL23, VCP, RPS14, PSMC2, PSMA3, IPO5, IKBKG, UBC, MDM2, HSPB1, RPS10, KPNA1	191	973	16650	0.0584384	4.3004	4.63845e-14	9.46623e-16	1.81221e-14
GOTERM_BP_FAT	GO:0032269~negative regulation of cellular protein metabolic process	48	25	2.03576e-17	HSP90AB1, SNCA, NFKB1, HSPA1A, PTEN, RPS3, CTNNB1, CUL3, AKT1, RACK1, USP19, HSPH1, APP, EZR, CRY2, PSMB1, ISG15, UBASH3B, TARDBP, PSMD1, NPM1, DNAJA1, PSMD2, MYC, GAPDH, PINX1, EGFR, GABARAPL2, NF2, CBL, ESR1, SLC9A3R1, CDK5, CDK2, BRCA1, ANXA2, YWHAG, ARRB2, PSMC4, PSMD11, OTUB1, PSMC2, PSMA3, UBC, HSPB1, MDM2, LRRK2, HDAC6	191	992	16650	0.0595796	4.21804	9.88564e-14	1.83067e-15	3.86225e-14
GOTERM_BP_FAT	GO:0060341~regulation of cellular localization	44	22.9167	2.96587e-17	HSP90AB1, XPO1, YWHAZ, ERBB2, SNCA, ARF6, RDX, CCT2, CDH1, CLTC, PTEN, IQGAP1, CTNNB1, RACK1, AKT1, HSPH1, EZR, UBASH3B, DNAJA1, MSN, EMD, FBXW11, PINX1, SYK, EGFR, TCP1, HSP90AA1, NF2, HTT, TP53, LMNA, CFTR, CCT6A, SLC9A3R1, CDK5, FLNA, YWHAG, CCT4, HUWE1, IPO5, YWHAQ, MDM2, RUVBL1, LRRK2	191	834	16650	0.0500901	4.59904	1.44023e-13	2.57183e-15	5.62686e-14
GOTERM_BP_FAT	GO:0032880~regulation of protein localization	47	24.4792	3.38461e-17	HSP90AB1, XPO1, YWHAZ, ERBB2, ARF6, CDH1, RDX, CCT2, CLTC, LGR4, IQGAP1, CTNNB1, RACK1, AKT1, HSPH1, EZR, TARDBP, DNAJA1, NOS2, MSN, EMD, FBXW11, HSPA8, PINX1, SYK, FN1, PRKCA, EGFR, TCP1, HSP90AA1, NF2, TP53, LMNA, CFTR, CCT6A, SLC9A3R1, CDK5, FLNA, YWHAG, CCT4, HUWE1, IPO5, YWHAQ, MDM2, RUVBL1, LRRK2, HDAC6	191	962	16650	0.0577778	4.25896	1.64357e-13	2.88345e-15	6.4213e-14
GOTERM_BP_FAT	GO:0023014~signal transduction by protein phosphorylation	44	22.9167	1.82066e-16	GNAI2, COPS5, GRB2, ERBB3, ERBB2, NFKB1, PTEN, IQGAP1, RPS3, CTNNB1, AKT1, CUL3, HSPH1, EZR, PSMB1, PSMD1, DNAJA1, PSMD2, SHC1, FBXW11, MYC, CUL1, FN1, SYK, PRKCA, EGFR, ICAM1, NF2, MAPK10, SLC9A3R1, STK4, ADRB2, ARRB2, PSMC4, PSMD11, NTRK1, PSMC2, PSMA3, IKBKG, UBC, RIPK2, LRRK2, CRK, SPTAN1	191	877	16650	0.0526727	4.37355	1.07825e-12	1.63203e-14	4.21885e-13
GOTERM_BP_FAT	GO:0000165~MAPK cascade	43	22.3958	2.28773e-16	GNAI2, COPS5, GRB2, ERBB3, ERBB2, NFKB1, PTEN, IQGAP1, RPS3, CTNNB1, AKT1, CUL3, HSPH1, EZR, PSMB1, PSMD1, DNAJA1, PSMD2, SHC1, FBXW11, MYC, CUL1, SYK, FN1, PRKCA, EGFR, ICAM1, NF2, MAPK10, SLC9A3R1, ADRB2, ARRB2, PSMC4, PSMD11, NTRK1, PSMC2, PSMA3, IKBKG, UBC, RIPK2, LRRK2, CRK, SPTAN1	191	841	16650	0.0505105	4.45711	1.07825e-12	1.58762e-14	4.21885e-13
GOTERM_BP_FAT	GO:1902580~single-organism cellular localization	49	25.5208	3.47465e-16	HSP90AB1, YWHAZ, PDIA3, ERBB2, SNCA, ARF6, CDH1, RDX, CLTC, CANX, RPS3, CTNNB1, RACK1, AKT1, TNFRSF1A, APP, EZR, CRY2, CSE1L, RPLP0, HSPA4, RANBP2, EMD, FBXW11, SYK, EGFR, RPSA, HSP90AA1, HTT, FLOT2, TP53, LMNA, IPO9, ITGA4, RPS4X, SLC9A3R1, MYH9, CDK5, FLNA, ANXA2, YWHAG, RPL23, RPS14, IPO5, YWHAQ, RPS10, SMURF1, LRRK2, KPNA1	191	1102	16650	0.0661862	3.8761	1.61737e-12	2.30926e-14	6.32827e-13
GOTERM_BP_FAT	GO:0006886~intracellular protein transport	47	24.4792	4.22748e-16	HSP90AB1, XPO1, YWHAZ, DERL1, PDIA3, ERBB2, CDH1, CLTC, RPS3, CTNNB1, AKT1, CRY2, CSE1L, RPLP0, NPM1, HSPA4, RANBP2, EMD, FBXW11, HSPA8, SYK, EGFR, RPSA, HSP90AA1, TP53, LMNA, IPO9, RPS4X, SLC9A3R1, CDK5, FLNA, GABARAP, ANXA2, YWHAG, HUWE1, RPL23, VCP, RPS14, IPO5, YWHAQ, MDM2, RPS10, RUVBL1, SMURF1, LRRK2, KPNA1, HDAC6	191	1020	16650	0.0612613	4.01678	2.1565e-12	3.04201e-14	8.43769e-13
GOTERM_BP_FAT	GO:0023056~positive regulation of signaling	58	30.2083	6.29447e-16	HSP90AB1, PDIA3, SNCA, NFKB1, PTEN, LGR4, IQGAP1, RPS3, CTNNB1, AKT1, TARDBP, PSMD1, PSMD2, SHC1, WWOX, SYK, PRKCA, EGFR, ICAM1, RELA, TP53, CFTR, SLC9A3R1, STK4, FLNA, ADRB2, ARRB2, PSMA3, UBC, RIPK2, LRRK2, YWHAZ, GNAI2, GRB2, ERBB3, ERBB2, HSPA1A, CDC73, STAU1, RACK1, TNFRSF1A, PSMB1, TGM2, HTT, CBL, SNW1, MAPK10, ANXA2, IKBKE, YWHAG, PSMC4, PSMD11, PSMC2, NTRK1, IKBKG, YWHAQ, CRK, HDAC6	191	1563	16650	0.0938739	3.23482	3.23475e-12	4.37428e-14	1.26565e-12
GOTERM_BP_FAT	GO:0080134~regulation of response to stress	52	27.0833	1.19296e-15	HSP90AB1, COPS5, NFKB1, PTEN, LGR4, RPS3, AKT1, USP19, HSPH1, BAG3, PSMD1, PSMD2, RANBP2, NOS2, MYC, CUL1, SYK, PRKCA, EGFR, HSP90AA1, RELA, FLOT2, ESR1, ARRB2, PSMA3, UBC, HSPB1, MDM2, RIPK2, LRRK2, HSPA1A, RACK1, TNFRSF1A, EZR, HNRNPK, PSMB1, UBASH3B, NPM1, TGM2, DNAJA1, HSPA5, FBXW11, HSPA8, BRCA1, ANXA2, IKBKE, PSMC4, PSMD11, OTUB1, PSMC2, IKBKG, HDAC6	191	1285	16650	0.0771772	3.52761	5.93037e-12	7.70495e-14	2.32037e-12
GOTERM_BP_FAT	GO:0033043~regulation of organelle organization	49	25.5208	1.6484e-15	XPO1, YWHAZ, LIMA1, GRB2, SNCA, ARF6, HSPA1A, RDX, CCT2, AURKA, RCC1, CTNNB1, RPS3, CUL3, AKT1, EZR, CUL7, MAP1LC3B, NPM1, OBSL1, MSN, MYC, PINX1, ICAM1, TCP1, NF2, HTT, TP53, LMNA, SNW1, CCT6A, CDK5, HNRNPA1, BRCA1, ANXA2, HDAC5, ADRB2, YWHAG, CCT4, HUWE1, ARRB2, OTUB1, YWHAQ, RUVBL1, LRRK2, CRK, CCDC8, HDAC6, SPTAN1	191	1152	16650	0.0691892	3.70787	8.08686e-12	1.0103e-13	3.16414e-12
GOTERM_BP_FAT	GO:0010647~positive regulation of cell communication	57	29.6875	2.30912e-15	HSP90AB1, PDIA3, SNCA, NFKB1, PTEN, LGR4, IQGAP1, RPS3, CTNNB1, AKT1, TARDBP, PSMD1, PSMD2, SHC1, WWOX, SYK, PRKCA, EGFR, ICAM1, RELA, TP53, CFTR, SLC9A3R1, STK4, FLNA, ADRB2, ARRB2, PSMA3, UBC, RIPK2, LRRK2, YWHAZ, GNAI2, ERBB3, GRB2, ERBB2, HSPA1A, CDC73, STAU1, RACK1, TNFRSF1A, PSMB1, TGM2, HTT, CBL, SNW1, MAPK10, IKBKE, YWHAG, PSMC4, PSMD11, PSMC2, NTRK1, IKBKG, YWHAQ, CRK, HDAC6	191	1555	16650	0.0933934	3.1954	1.13216e-11	1.36446e-13	4.41869e-12
GOTERM_BP_FAT	GO:0098609~cell-cell adhesion	49	25.5208	2.51206e-15	HSP90AB1, LIMA1, IQGAP1, CTNNB1, AKT1, ACTG1, HSPH1, BAG3, SHC1, MSN, SYK, PRKCA, EGFR, ICAM1, FLOT2, ACTN1, EEF2, MYH9, SLC9A3R2, FLNA, HSPB1, RIPK2, RUVBL1, YWHAZ, GRB2, ERBB2, RDX, HSPA1A, CDH1, TAGLN2, VCAM1, RACK1, HNRNPK, EZR, UBASH3B, HSPA5, EMD, HSPA8, ENO1, ACTB, RPSA, NF2, LGALS3, CBL, ITGA4, ANXA2, AIRE, AHSA1, SPTAN1	191	1164	16650	0.0699099	3.66964	1.23999e-11	1.4766e-13	4.84057e-12
GOTERM_BP_FAT	GO:0044248~cellular catabolic process	58	30.2083	2.90957e-15	HSP90AB1, SNCA, AURKA, PTEN, RPS3, CTNNB1, AKT1, CUL3, USP19, CUL2, CUL7, ISG15, RPLP0, PSMD1, PSMD2, FBXO25, MSN, NOS2, MYC, CUL1, TP53, RPS4X, CDK5, ADRB2, ARRB2, HUWE1, RPS14, PSMA3, UBC, MDM2, RPS10, UCHL3, AMFR, LRRK2, KPNA1, DERL1, RDX, HSPA1A, RACK1, EZR, PSMB1, FBXO6, HSPA5, FBXW11, RPSA, GABARAPL2, HTT, CBL, CAPN1, ANXA2, VCP, PSMC4, RPL23, UBA1, PSMD11, PSMC2, SMURF1, HDAC6	191	1616	16650	0.0970571	3.12873	1.40172e-11	1.64868e-13	5.4734e-12
GOTERM_BP_FAT	GO:0051130~positive regulation of cellular component organization	49	25.5208	4.62993e-15	YWHAZ, GRB2, ERBB2, SNCA, ARF6, CCT2, AURKA, IQGAP1, CTNNB1, RPS3, CUL3, RACK1, AKT1, EZR, HNRNPK, CUL7, OBSL1, MSN, SYK, FN1, ICAM1, TCP1, HSP90AA1, NF2, HTT, CBL, TP53, SNW1, CCT6A, CDK5, HNRNPA1, FLNA, BRCA1, ANXA2, YWHAG, ADRB2, CCT4, HUWE1, ARRB2, PSMC4, VCP, PSMC2, NTRK1, YWHAQ, CAND1, RUVBL1, SMURF1, CRK, HDAC6	191	1183	16650	0.0710511	3.61071	2.26432e-11	2.51577e-13	8.84848e-12
GOTERM_BP_FAT	GO:0007010~cytoskeleton organization	48	25	5.95145e-15	XPO1, LIMA1, GRB2, SNCA, ARF6, AURKA, RDX, CLTC, RCC1, TPM3, RPS3, CTNNB1, ACTG1, CUL3, TUBB, EZR, CUL7, KRT8, NPM1, OBSL1, SHC1, TUBG1, MSN, TUBA1A, GAPDH, TUBA1B, TUBA1C, TUBB3, TUBB4B, ACTB, ICAM1, NF2, HTT, LMNA, ACTN1, SLC9A3R1, MYH9, CDK5, BRCA1, FLNA, CDK2, GABARAP, SVIL, TUBA4A, CRK, SPTAN1, HDAC6, CCDC8	191	1144	16650	0.0687087	3.6576	2.91127e-11	3.19966e-13	1.13687e-11
GOTERM_BP_FAT	GO:1902589~single-organism organelle organization	57	29.6875	1.0868e-14	XPO1, LIMA1, SNCA, AURKA, CLTC, RPS3, CTNNB1, ACTG1, CUL3, CUL7, MAP1LC3A, SHC1, TUBG1, RANBP2, MYC, TUBA1B, ICAM1, HSP90AA1, TP53, ACTN1, SLC9A3R1, MYH9, CDK5, FLNA, CDK2, ADRB2, CCDC8, IQCB1, YWHAZ, GRB2, ARF6, RDX, HSPA1A, RCC1, TPM3, TUBB, EZR, KRT8, NPM1, OBSL1, HSPA4, GAPDH, PINX1, GABARAPL2, GABARAPL1, NF2, HTT, LMNA, BRCA1, GABARAP, ANXA2, YWHAG, VCP, YWHAQ, SMURF1, SPTAN1, HDAC6	191	1612	16650	0.0968168	3.08241	5.28342e-11	5.56111e-13	2.0639e-11
GOTERM_BP_FAT	GO:0009967~positive regulation of signal transduction	53	27.6042	2.02239e-14	HSP90AB1, PDIA3, NFKB1, PTEN, LGR4, IQGAP1, RPS3, CTNNB1, AKT1, PSMD1, PSMD2, SHC1, WWOX, SYK, PRKCA, EGFR, ICAM1, RELA, TP53, SLC9A3R1, STK4, FLNA, ADRB2, ARRB2, PSMA3, UBC, RIPK2, LRRK2, YWHAZ, GNAI2, ERBB3, GRB2, ERBB2, HSPA1A, CDC73, RACK1, TNFRSF1A, PSMB1, TGM2, HTT, CBL, SNW1, MAPK10, IKBKE, YWHAG, PSMC4, PSMD11, PSMC2, NTRK1, IKBKG, YWHAQ, CRK, HDAC6	191	1428	16650	0.0857658	3.2354	9.81206e-11	1.0012e-12	3.8336e-11
GOTERM_BP_FAT	GO:0009968~negative regulation of signal transduction	46	23.9583	2.11487e-14	GRB2, ERBB3, SNCA, HSPA1A, PTEN, LGR4, CTNNB1, RACK1, AKT1, CUL3, HSPH1, EZR, CRY2, PSMB1, UBASH3B, PSMD1, DNAJA1, PSMD2, HSPA5, FBXW11, MYC, WWOX, EGFR, ICAM1, NF2, LGALS3, HTT, RELA, CBL, ESR1, LMNA, ESR2, SLC9A3R1, STK4, BRCA1, ADRB2, ARRB2, PSMC4, PSMD11, PSMC2, PSMA3, UBC, HSPB1, MDM2, SMURF1, LRRK2	191	1089	16650	0.0654054	3.68223	1.02434e-10	1.02429e-12	4.00235e-11
GOTERM_BP_FAT	GO:0044092~negative regulation of molecular function	46	23.9583	3.04646e-14	GNAI2, SNCA, NFKB1, AURKA, RDX, PTEN, IQGAP1, RACK1, AKT1, CUL3, APP, CRY2, PSMB1, UBASH3B, PSMD1, NPM1, DNAJA1, PSMD2, HSPA5, RANBP2, PINX1, PRKCA, NF2, CBL, TP53, ESR1, ITGA4, SLC9A3R1, CDK2, FLNA, ANXA2, YWHAG, ADRB2, ARRB2, PSMC4, PSMD11, PSMC2, PSMA3, IPO5, UBC, HSPB1, MDM2, CAND1, LRRK2, HDAC6, CCDC8	191	1100	16650	0.0660661	3.64541	1.4772e-10	1.40687e-12	5.77094e-11
GOTERM_BP_FAT	GO:0010941~regulation of cell death	54	28.125	4.57836e-14	HSP90AB1, PDIA3, SNCA, AURKA, NFKB1, PTEN, RPS3, CTNNB1, AKT1, HSPH1, BAG3, MYC, WWOX, PRKCA, EGFR, ICAM1, RELA, TP53, ESR1, ACTN1, SLC9A3R1, STK4, CDK5, FLNA, ARRB2, UBC, HSPB1, MDM2, RIPK2, ZNF746, LRRK2, YWHAZ, ERBB3, HSPA1A, RACK1, TNFRSF1A, HNRNPK, NPM1, TGM2, DNAJA1, HSPA5, TCP1, LGALS3, VHL, HTT, CBL, LMNA, BRCA1, YWHAG, VCP, NTRK1, IKBKG, YWHAQ, HDAC6	191	1509	16650	0.0906306	3.1195	2.22119e-10	2.0759e-12	8.6775e-11
GOTERM_BP_FAT	GO:0043067~regulation of programmed cell death	52	27.0833	5.51992e-14	HSP90AB1, PDIA3, SNCA, AURKA, NFKB1, PTEN, RPS3, CTNNB1, AKT1, HSPH1, BAG3, MYC, WWOX, PRKCA, EGFR, ICAM1, RELA, TP53, ESR1, ACTN1, SLC9A3R1, STK4, CDK5, FLNA, ARRB2, UBC, HSPB1, MDM2, RIPK2, LRRK2, YWHAZ, ERBB3, HSPA1A, RACK1, TNFRSF1A, HNRNPK, NPM1, TGM2, DNAJA1, HSPA5, TCP1, LGALS3, VHL, HTT, CBL, LMNA, BRCA1, YWHAG, VCP, NTRK1, YWHAQ, HDAC6	191	1413	16650	0.0848649	3.20806	2.67945e-10	2.48102e-12	1.04683e-10
GOTERM_BP_FAT	GO:0048585~negative regulation of response to stimulus	51	26.5625	6.65555e-14	GRB2, ERBB3, SNCA, NFKB1, HSPA1A, PTEN, LGR4, CTNNB1, RPS3, CUL3, RACK1, AKT1, TNFRSF1A, HSPH1, EZR, CRY2, PSMB1, UBASH3B, PSMD1, DNAJA1, PSMD2, HSPA5, FBXW11, MYC, WWOX, EGFR, ICAM1, NF2, LGALS3, HTT, RELA, CBL, LMNA, ESR1, ESR2, SLC9A3R1, STK4, BRCA1, ANXA2, ADRB2, ARRB2, PSMC4, OTUB1, PSMD11, PSMC2, PSMA3, UBC, MDM2, HSPB1, SMURF1, LRRK2	191	1369	16650	0.0822222	3.24749	3.22935e-10	2.93576e-12	1.26166e-10
GOTERM_BP_FAT	GO:0010648~negative regulation of cell communication	47	24.4792	9.05907e-14	GNAI2, GRB2, ERBB3, SNCA, HSPA1A, PTEN, LGR4, CTNNB1, RACK1, AKT1, CUL3, HSPH1, EZR, CRY2, PSMB1, UBASH3B, PSMD1, DNAJA1, PSMD2, HSPA5, FBXW11, MYC, WWOX, EGFR, ICAM1, NF2, LGALS3, HTT, RELA, CBL, ESR1, LMNA, ESR2, SLC9A3R1, STK4, BRCA1, ADRB2, ARRB2, PSMC4, PSMD11, PSMC2, PSMA3, UBC, HSPB1, MDM2, SMURF1, LRRK2	191	1182	16650	0.070991	3.46626	4.39925e-10	3.92786e-12	1.71874e-10
GOTERM_BP_FAT	GO:0023057~negative regulation of signaling	47	24.4792	1.02282e-13	GNAI2, GRB2, ERBB3, SNCA, HSPA1A, PTEN, LGR4, CTNNB1, RACK1, AKT1, CUL3, HSPH1, EZR, CRY2, PSMB1, UBASH3B, PSMD1, DNAJA1, PSMD2, HSPA5, FBXW11, MYC, WWOX, EGFR, ICAM1, NF2, LGALS3, HTT, RELA, CBL, ESR1, LMNA, ESR2, SLC9A3R1, STK4, BRCA1, ADRB2, ARRB2, PSMC4, PSMD11, PSMC2, PSMA3, UBC, HSPB1, MDM2, SMURF1, LRRK2	191	1186	16650	0.0712312	3.45457	4.96533e-10	4.31766e-12	1.93989e-10
GOTERM_BP_FAT	GO:0009719~response to endogenous stimulus	54	28.125	1.28162e-13	HSP90AB1, SNCA, CAD, NFKB1, PTEN, IQGAP1, CTNNB1, AKT1, APP, CRY2, RPLP0, SHC1, RANBP2, MYC, WWOX, SYK, EGFR, ICAM1, HSP90AA1, EFTUD2, RELA, ESR1, CFTR, EEF2, ESR2, CDK5, ARRB2, IPO5, UBC, MDM2, RIPK2, LRRK2, GNAI2, GRB2, ERBB2, RDX, HSPA1A, CDH1, VCAM1, HNRNPM, EZR, DNAJA1, HSPA5, EEF1A1, CBL, SNW1, HNRNPA1, BRCA1, ANXA2, HDAC5, YWHAG, NTRK1, SMURF1, HDAC6	191	1548	16650	0.092973	3.04091	6.22149e-10	5.36338e-12	2.43072e-10
GOTERM_BP_FAT	GO:0042325~regulation of phosphorylation	51	26.5625	1.30051e-13	HSP90AB1, COPS5, SNCA, PTEN, IQGAP1, RPS3, CTNNB1, AKT1, CUL3, HSPH1, APP, TARDBP, SHC1, RANBP2, MYC, SYK, PRKCA, EGFR, ICAM1, TP53, PRKAB1, SLC9A3R1, STK4, CDK5, ADRB2, ARRB2, UBC, HSPB1, RIPK2, LRRK2, GNAI2, ERBB3, GRB2, ERBB2, RACK1, TNFRSF1A, EZR, UBASH3B, NPM1, DNAJA1, HSPA5, FN1, NF2, CBL, MAPK10, ANXA2, YWHAG, VCP, NTRK1, IKBKG, CRK	191	1393	16650	0.0836637	3.19154	6.31315e-10	5.39591e-12	2.46647e-10
GOTERM_BP_FAT	GO:0042981~regulation of apoptotic process	51	26.5625	1.57644e-13	HSP90AB1, PDIA3, SNCA, AURKA, NFKB1, PTEN, CTNNB1, RPS3, AKT1, HSPH1, BAG3, MYC, WWOX, PRKCA, EGFR, ICAM1, RELA, TP53, ESR1, ACTN1, SLC9A3R1, CDK5, STK4, FLNA, ARRB2, UBC, MDM2, RIPK2, HSPB1, LRRK2, YWHAZ, ERBB3, HSPA1A, RACK1, TNFRSF1A, HNRNPK, NPM1, TGM2, DNAJA1, HSPA5, TCP1, LGALS3, HTT, VHL, CBL, LMNA, BRCA1, YWHAG, VCP, NTRK1, YWHAQ	191	1400	16650	0.0840841	3.17558	7.65557e-10	6.48781e-12	2.99094e-10
GOTERM_BP_FAT	GO:0019220~regulation of phosphate metabolic process	55	28.6458	1.61052e-13	HSP90AB1, COPS5, SNCA, PTEN, IQGAP1, RPS3, CTNNB1, AKT1, CUL3, HSPH1, APP, CRY2, TARDBP, SHC1, RANBP2, NOS2, MYC, SYK, PRKCA, EGFR, ICAM1, TP53, PRKAB1, SLC9A3R1, STK4, CDK5, ADRB2, ARRB2, UBC, HSPB1, RIPK2, LRRK2, CCDC8, GNAI2, GRB2, ERBB3, ERBB2, RACK1, TNFRSF1A, EZR, UBASH3B, NPM1, DNAJA1, HSPA5, FN1, NF2, HTT, CBL, MAPK10, ANXA2, YWHAG, VCP, NTRK1, IKBKG, CRK	191	1610	16650	0.0966967	2.97795	7.82269e-10	6.57374e-12	3.05622e-10
GOTERM_BP_FAT	GO:0001932~regulation of protein phosphorylation	49	25.5208	1.6253e-13	HSP90AB1, GNAI2, COPS5, GRB2, ERBB3, ERBB2, SNCA, PTEN, IQGAP1, CTNNB1, RPS3, CUL3, RACK1, AKT1, TNFRSF1A, HSPH1, APP, EZR, UBASH3B, TARDBP, NPM1, DNAJA1, SHC1, HSPA5, MYC, SYK, FN1, EGFR, PRKCA, ICAM1, NF2, CBL, TP53, PRKAB1, MAPK10, SLC9A3R1, CDK5, STK4, ANXA2, ADRB2, YWHAG, ARRB2, NTRK1, IKBKG, UBC, RIPK2, HSPB1, LRRK2, CRK	191	1300	16650	0.0780781	3.28574	7.89278e-10	6.57729e-12	3.08364e-10
GOTERM_BP_FAT	GO:0051174~regulation of phosphorus metabolic process	55	28.6458	1.65198e-13	HSP90AB1, COPS5, SNCA, PTEN, IQGAP1, RPS3, CTNNB1, AKT1, CUL3, HSPH1, APP, CRY2, TARDBP, SHC1, RANBP2, NOS2, MYC, SYK, PRKCA, EGFR, ICAM1, TP53, PRKAB1, SLC9A3R1, STK4, CDK5, ADRB2, ARRB2, UBC, HSPB1, RIPK2, LRRK2, CCDC8, GNAI2, GRB2, ERBB3, ERBB2, RACK1, TNFRSF1A, EZR, UBASH3B, NPM1, DNAJA1, HSPA5, FN1, NF2, HTT, CBL, MAPK10, ANXA2, YWHAG, VCP, NTRK1, IKBKG, CRK	191	1611	16650	0.0967568	2.9761	8.02217e-10	6.62992e-12	3.13416e-10
GOTERM_BP_FAT	GO:0043086~negative regulation of catalytic activity	39	20.3125	2.02212e-13	GNAI2, SNCA, NFKB1, RDX, PTEN, IQGAP1, RACK1, AKT1, CUL3, APP, CRY2, PSMB1, UBASH3B, PSMD1, NPM1, DNAJA1, PSMD2, RANBP2, PINX1, PRKCA, NF2, CBL, TP53, CDK2, ANXA2, YWHAG, ARRB2, PSMC4, PSMD11, PSMC2, PSMA3, IPO5, UBC, HSPB1, MDM2, CAND1, LRRK2, HDAC6, CCDC8	191	839	16650	0.0503904	4.05213	9.81745e-10	7.98162e-12	3.8356e-10
GOTERM_BP_FAT	GO:0060548~negative regulation of cell death	40	20.8333	3.35362e-13	HSP90AB1, YWHAZ, ERBB3, SNCA, NFKB1, HSPA1A, AURKA, PTEN, CTNNB1, RACK1, AKT1, HSPH1, HNRNPK, BAG3, NPM1, DNAJA1, TGM2, HSPA5, MYC, PRKCA, EGFR, ICAM1, LGALS3, VHL, HTT, RELA, CBL, TP53, LMNA, CDK5, FLNA, BRCA1, ARRB2, NTRK1, IKBKG, UBC, HSPB1, MDM2, RIPK2, LRRK2	191	897	16650	0.0538739	3.8873	1.62869e-09	1.28244e-11	6.36324e-10
GOTERM_BP_FAT	GO:0071495~cellular response to endogenous stimulus	46	23.9583	4.26835e-13	HSP90AB1, GRB2, ERBB2, SNCA, NFKB1, HSPA1A, RDX, CDH1, CAD, IQGAP1, CTNNB1, AKT1, HNRNPM, APP, EZR, CRY2, RPLP0, DNAJA1, SHC1, HSPA5, MYC, WWOX, SYK, EGFR, ICAM1, EEF1A1, RELA, CBL, ESR1, SNW1, CFTR, EEF2, ESR2, HNRNPA1, BRCA1, HDAC5, YWHAG, ARRB2, NTRK1, IPO5, UBC, MDM2, RIPK2, SMURF1, LRRK2, HDAC6	191	1185	16650	0.0711712	3.38392	2.07293e-09	1.5704e-11	8.09874e-10
GOTERM_BP_FAT	GO:0031401~positive regulation of protein modification process	45	23.4375	5.19783e-13	HSP90AB1, DERL1, GNAI2, ERBB3, ERBB2, SNCA, PTEN, IQGAP1, RPS3, CTNNB1, RACK1, AKT1, HSPH1, TNFRSF1A, PSMB1, PSMD1, PSMD2, SHC1, HSPA5, CUL1, SYK, PRKCA, EGFR, ICAM1, TP53, SNW1, MAPK10, CDK5, STK4, BRCA1, ANXA2, ADRB2, ARRB2, PSMC4, VCP, PSMD11, NTRK1, PSMC2, PSMA3, IKBKG, UBC, RIPK2, SMURF1, LRRK2, CRK	191	1143	16650	0.0686486	3.432	2.52418e-09	1.88372e-11	9.86178e-10
GOTERM_BP_FAT	GO:0044802~single-organism membrane organization	39	20.3125	5.37911e-13	YWHAZ, ERBB2, SNCA, HSPA1A, ARF6, RDX, CDH1, CLTC, PTEN, RPS3, RACK1, AKT1, TNFRSF1A, EZR, RPLP0, TARDBP, HSPA4, RANBP2, EMD, MYC, PRKCA, EGFR, RPSA, HSP90AA1, FLOT2, TP53, LMNA, ITGA4, SLC9A3R1, RPS4X, CDK5, FLNA, ANXA2, YWHAG, RPL23, RPS14, YWHAQ, RPS10, SMURF1	191	866	16650	0.052012	3.92579	2.61206e-09	1.93485e-11	1.02052e-09
GOTERM_BP_FAT	GO:0051726~regulation of cell cycle	41	21.3542	1.04333e-12	XPO1, COPS5, AURKA, CDC73, RDX, CLTC, RCC1, PTEN, CTNNB1, RACK1, AKT1, CUL3, USP19, CUL2, APP, PSMB1, CUL7, TARDBP, PSMD1, NPM1, PSMD2, OBSL1, MYC, HSPA8, CUL1, PRKCA, EGFR, TP53, PRKAB1, SLC9A3R1, CDK5, CDK2, BRCA1, PSMC4, PSMD11, SVIL, PSMC2, PSMA3, UBC, MDM2, CCDC8	191	976	16650	0.0586186	3.66197	5.06615e-09	3.59301e-11	1.97931e-09
GOTERM_BP_FAT	GO:0010557~positive regulation of macromolecule biosynthetic process	53	27.6042	1.66506e-12	COPS5, XRCC6, RPS6KB2, CCT2, NFKB1, LGR4, CTNNB1, AKT1, HSPH1, APP, SHC1, MYC, WWOX, SYK, EGFR, RELA, TP53, ESR1, EEF2, ESR2, CCT6A, RPS4X, CDK2, ADRB2, ARRB2, UBC, HSPB1, RIPK2, CAND1, ZNF746, ERBB2, CDC73, CDH1, TNFRSF1A, HNRNPK, NPM1, HSPA5, FBXW11, TCP1, VHL, LMNA, SNW1, SIRT7, HNRNPA1, BRCA1, HDAC5, CCT4, PSMC4, ILF2, PSMC2, IKBKG, AIRE, HDAC6	191	1597	16650	0.0959159	2.89302	8.08525e-09	5.42634e-11	3.15885e-09
GOTERM_BP_FAT	GO:0045935~positive regulation of nucleobase-containing compound metabolic process	54	28.125	1.94573e-12	COPS5, XRCC6, CCT2, NFKB1, LGR4, RPS3, CTNNB1, AKT1, HSPH1, APP, SHC1, NOS2, MYC, WWOX, PRKCA, EGFR, RELA, TP53, ESR1, ESR2, CCT6A, CDK2, ADRB2, ARRB2, UBC, RIPK2, CAND1, ZNF746, ERBB2, HSPA1A, CDC73, CDH1, RACK1, TNFRSF1A, HNRNPK, NPM1, HSPA5, FBXW11, HSPA8, TCP1, VHL, LMNA, SNW1, SIRT7, HNRNPA1, BRCA1, HDAC5, CCT4, VCP, PSMC4, ILF2, PSMC2, IKBKG, AIRE	191	1658	16650	0.0995796	2.83916	9.44869e-09	6.25742e-11	3.69154e-09
GOTERM_BP_FAT	GO:0043085~positive regulation of catalytic activity	52	27.0833	2.45253e-12	HSP90AB1, SNCA, CCT2, PTEN, IQGAP1, RPS3, CTNNB1, AKT1, HSPH1, APP, PSMD1, PSMD2, SHC1, NOS2, MYC, CUL1, SYK, PRKCA, EGFR, ICAM1, ESR1, STK4, CDK5, ADRB2, PSMA3, UBC, RIPK2, LRRK2, GNAI2, ERBB3, GRB2, ERBB2, HSPA1A, RCC1, RACK1, PSMB1, NPM1, HSPA5, FN1, GABARAPL2, TCP1, MAPK10, CCT4, VCP, PSMC4, PSMD11, PSMC2, NTRK1, IKBKG, AHSA1, CRK, SPTAN1	191	1559	16650	0.0936336	2.90762	1.19093e-08	7.73328e-11	4.65286e-09
GOTERM_BP_FAT	GO:0061024~membrane organization	41	21.3542	5.18369e-12	YWHAZ, ERBB2, SNCA, HSPA1A, ARF6, RDX, CDH1, CLTC, PTEN, RPS3, RACK1, AKT1, CUL3, TNFRSF1A, EZR, RPLP0, TARDBP, HSPA4, RANBP2, EMD, MYC, PRKCA, EGFR, RPSA, HSP90AA1, FLOT2, TP53, LMNA, ITGA4, MYH9, SLC9A3R1, RPS4X, CDK5, FLNA, ANXA2, YWHAG, RPL23, RPS14, YWHAQ, RPS10, SMURF1	191	1027	16650	0.0616817	3.48012	2.51723e-08	1.56349e-10	9.83461e-09
GOTERM_BP_FAT	GO:1901698~response to nitrogen compound	38	19.7917	6.71379e-12	HSP90AB1, GNAI2, GRB2, SNCA, NFKB1, CDH1, CAD, PTEN, IQGAP1, CTNNB1, VCAM1, AKT1, APP, EZR, CRY2, RPLP0, NPM1, SHC1, RANBP2, MYC, EGFR, ICAM1, HSP90AA1, EFTUD2, RELA, ESR1, CFTR, EEF2, CDK5, BRCA1, CDK2, HDAC5, YWHAG, NTRK1, IPO5, MDM2, RIPK2, LRRK2	191	895	16650	0.0537538	3.70119	3.26019e-08	2.01246e-10	1.27373e-08
GOTERM_BP_FAT	GO:1901700~response to oxygen-containing compound	49	25.5208	1.27623e-11	HSP90AB1, GNAI2, GRB2, SNCA, NFKB1, CAD, CDC73, CDH1, PTEN, IQGAP1, RPS3, CTNNB1, RACK1, VCAM1, AKT1, HSPH1, TNFRSF1A, APP, EZR, CRY2, RPLP0, KRT8, SHC1, NOS2, MSN, MYC, PRKCA, EGFR, ICAM1, HSP90AA1, EFTUD2, RELA, CBL, ESR1, SNW1, CFTR, EEF2, RPS4X, CDK5, CDK2, BRCA1, HDAC5, YWHAG, NTRK1, IPO5, MDM2, RIPK2, LRRK2, HDAC6	191	1466	16650	0.088048	2.91369	6.19734e-08	3.68889e-10	2.42126e-08
GOTERM_BP_FAT	GO:0002682~regulation of immune system process	47	24.4792	1.99643e-11	HSP90AB1, GRB2, ERBB2, SNCA, NFKB1, HSPA1A, CDC73, PTEN, LGR4, CTNNB1, ACTG1, VCAM1, AKT1, HSPH1, EZR, PSMB1, ISG15, UBASH3B, PSMD1, PSMD2, SHC1, MSN, FBXW11, MYC, CUL1, SYK, ACTB, PRKCA, ICAM1, HSP90AA1, LGALS3, RELA, FLOT2, ESR1, ITGA4, MAPK10, IKBKE, ARRB2, PSMC4, PSMD11, PSMC2, PSMA3, IKBKG, UBC, AIRE, RIPK2, CRK	191	1378	16650	0.0827628	2.97324	9.69464e-08	5.57163e-10	3.78762e-08
GOTERM_BP_FAT	GO:0014070~response to organic cyclic compound	36	18.75	1.75384e-10	HSP90AB1, SNCA, NFKB1, CDH1, CAD, PTEN, CTNNB1, VCAM1, AKT1, APP, EZR, CRY2, RPLP0, NPM1, DNAJA1, MSN, MYC, EGFR, ICAM1, HSP90AA1, EFTUD2, RELA, ESR1, SNW1, CFTR, EEF2, ESR2, CDK5, BRCA1, HDAC5, ARRB2, NTRK1, MDM2, RIPK2, LRRK2, HDAC6	191	906	16650	0.0544144	3.46382	8.51662e-07	4.53012e-09	3.32738e-07
GOTERM_BP_FAT	GO:0018193~peptidyl-amino acid modification	41	21.3542	4.00862e-10	ERBB3, ERBB2, SNCA, CAD, AURKA, IQGAP1, CTNNB1, RACK1, AKT1, HSPH1, TNFRSF1A, APP, HNRNPK, TGM2, SHC1, NOS2, RANBP2, GAPDH, SYK, PRKCA, EGFR, ICAM1, HSP90AA1, NF2, CBL, TP53, SNW1, EEF2, CDK5, STK4, CDK2, BRCA1, HDAC5, ARRB2, VCP, NTRK1, RIPK2, MDM2, RUVBL1, LRRK2, HDAC6	191	1185	16650	0.0711712	3.0161	1.94658e-06	1.00339e-08	7.60516e-07
GOTERM_BP_FAT	GO:0007267~cell-cell signaling	47	24.4792	4.94742e-10	GNAI2, GRB2, SNCA, NFKB1, CDC73, CLTC, PTEN, LGR4, STAU1, CTNNB1, RACK1, AKT1, CUL3, CRY2, PSMB1, TARDBP, PSMD1, PSMD2, NOS2, EMD, FBXW11, MYC, HSPA8, WWOX, CUL1, PRKCA, EGFR, FLOT2, CFTR, ESR2, SLC9A3R1, STK4, CDK5, FLNA, GABARAP, YWHAG, ADRB2, ARRB2, PSMC4, NOLC1, PSMD11, NTRK1, PSMC2, PSMA3, UBC, SMURF1, LRRK2	191	1517	16650	0.0911111	2.7008	2.40246e-06	1.20727e-08	9.38626e-07
GOTERM_BP_FAT	GO:0002684~positive regulation of immune system process	36	18.75	8.25849e-10	HSP90AB1, GRB2, NFKB1, HSPA1A, PTEN, LGR4, ACTG1, VCAM1, AKT1, HSPH1, EZR, PSMB1, ISG15, PSMD1, PSMD2, FBXW11, CUL1, SYK, ACTB, PRKCA, ICAM1, HSP90AA1, LGALS3, FLOT2, RELA, ITGA4, IKBKE, ARRB2, PSMC4, PSMD11, PSMC2, PSMA3, IKBKG, UBC, RIPK2, CRK	191	960	16650	0.0576577	3.26898	4.01031e-06	1.94676e-08	1.5668e-06
GOTERM_BP_FAT	GO:0050776~regulation of immune response	35	18.2292	8.44221e-10	HSP90AB1, GRB2, NFKB1, HSPA1A, PTEN, LGR4, ACTG1, VCAM1, EZR, PSMB1, PSMD1, PSMD2, SHC1, FBXW11, CUL1, SYK, ACTB, ICAM1, HSP90AA1, LGALS3, FLOT2, RELA, ESR1, MAPK10, ITGA4, IKBKE, ARRB2, PSMC4, PSMD11, PSMC2, PSMA3, IKBKG, UBC, RIPK2, CRK	191	912	16650	0.0547748	3.34545	4.09953e-06	1.98045e-08	1.60166e-06
GOTERM_BP_FAT	GO:0045087~innate immune response	33	17.1875	1.50175e-09	HSP90AB1, SNCA, NFKB1, HSPA1A, LGR4, VCAM1, APP, TUBB, PSMB1, ISG15, PSMD1, PSMD2, NOS2, GAPDH, MYC, FBXW11, CUL1, TUBB4B, SYK, ICAM1, LGALS3, FLOT2, RELA, ESR1, IKBKE, ARRB2, PSMC4, PSMD11, PSMC2, PSMA3, IKBKG, UBC, RIPK2	191	836	16650	0.0502102	3.44103	7.29247e-06	3.37616e-08	2.84913e-06
GOTERM_BP_FAT	GO:0022603~regulation of anatomical structure morphogenesis	37	19.2708	2.4314e-09	ERBB2, RDX, CLTC, PTEN, LGR4, CTNNB1, RACK1, EZR, CUL7, PSMB1, PSMD1, PSMD2, OBSL1, MSN, MYC, FN1, PRKCA, ICAM1, HTT, ESR1, MYH9, SLC9A3R1, CDK5, FLNA, BRCA1, HDAC5, ARRB2, PSMC4, PSMD11, NTRK1, PSMC2, PSMA3, UBC, HSPB1, SMURF1, LRRK2, CRK	191	1051	16650	0.0631231	3.06888	1.18068e-05	5.34249e-08	4.61287e-06
GOTERM_BP_FAT	GO:0006955~immune response	46	23.9583	3.24326e-09	HSP90AB1, GRB2, SNCA, NFKB1, HSPA1A, PTEN, LGR4, ACTG1, VCAM1, TNFRSF1A, TUBB, APP, EZR, PSMB1, ISG15, PSMD1, PSMD2, SHC1, NOS2, FBXW11, MYC, GAPDH, CUL1, TUBB4B, SYK, ACTB, ICAM1, HSP90AA1, LGALS3, FLOT2, RELA, ESR1, MAPK10, IKBKE, ILF2, ARRB2, PSMC4, OTUB1, PSMD11, PSMC2, PSMA3, IKBKG, UBC, AIRE, RIPK2, CRK	191	1551	16650	0.0931532	2.58539	1.57491e-05	6.9687e-08	6.15312e-06
GOTERM_BP_FAT	GO:1901701~cellular response to oxygen-containing compound	34	17.7083	3.28042e-09	GNAI2, GRB2, SNCA, NFKB1, CDC73, CDH1, CTNNB1, RPS3, RACK1, AKT1, HSPH1, APP, EZR, RPLP0, SHC1, MSN, NOS2, MYC, PRKCA, EGFR, ICAM1, RELA, ESR1, SNW1, CFTR, CDK2, BRCA1, HDAC5, YWHAG, IPO5, MDM2, RIPK2, LRRK2, HDAC6	191	912	16650	0.0547748	3.24986	1.59296e-05	7.0175e-08	6.22363e-06
GOTERM_BP_FAT	GO:0051172~negative regulation of nitrogen compound metabolic process	45	23.4375	4.11754e-09	XPO1, GNAI2, XRCC6, SNCA, NFKB1, CDC73, CLTC, LGR4, CTNNB1, RPS3, RACK1, CUL3, EZR, HNRNPK, CRY2, TARDBP, FBXW11, MYC, GAPDH, HSPA8, PINX1, ENO1, PRKCA, EGFR, NF2, VHL, RELA, TP53, ESR1, SNW1, ESR2, SIRT7, HNRNPA1, CDK5, BRCA1, FLNA, SUZ12, HDAC5, OTUB1, RPS14, UBC, YWHAQ, MDM2, ZNF746, HDAC6	191	1506	16650	0.0904505	2.60476	1.99946e-05	8.65576e-08	7.81182e-06
GOTERM_BP_FAT	GO:0042327~positive regulation of phosphorylation	34	17.7083	5.60781e-09	HSP90AB1, GNAI2, ERBB3, ERBB2, SNCA, PTEN, IQGAP1, CTNNB1, RPS3, RACK1, AKT1, HSPH1, TNFRSF1A, SHC1, HSPA5, MYC, SYK, PRKCA, EGFR, ICAM1, TP53, MAPK10, CDK5, STK4, ANXA2, ADRB2, ARRB2, VCP, NTRK1, IKBKG, UBC, RIPK2, LRRK2, CRK	191	932	16650	0.055976	3.18012	2.72312e-05	1.14901e-07	1.06392e-05
GOTERM_BP_FAT	GO:0016192~vesicle-mediated transport	44	22.9167	1.01143e-08	HSP90AB1, COPS5, GRB2, SNCA, ARF6, RDX, CLTC, PTEN, CANX, CTNNB1, RACK1, ACTG1, CUL3, HSPH1, LGALS3BP, APP, EZR, HNRNPK, TGM2, MSN, HSPA8, FN1, SYK, ACTB, EGFR, GABARAPL2, HSP90AA1, LGALS3, HTT, CBL, ACTN1, CFTR, ITGA4, MYH9, CDK5, FLNA, ANXA2, ADRB2, ARRB2, VCP, TUBA4A, LRRK2, CRK, SPTAN1	191	1494	16650	0.0897297	2.56734	4.91139e-05	2.02955e-07	1.91889e-05
GOTERM_BP_FAT	GO:0009628~response to abiotic stimulus	35	18.2292	1.78758e-08	HSP90AB1, GRB2, XRCC6, NFKB1, HSPA1A, PTEN, VCAM1, AKT1, CUL2, TNFRSF1A, APP, CRY2, BAG3, KRT8, HSPA6, DNAJA1, NOS2, MYC, EGFR, ICAM1, HSP90AA1, VHL, HTT, RELA, CBL, TP53, LMNA, MAPK10, CDK5, BRCA1, ADRB2, ARRB2, NTRK1, UBC, MDM2	191	1029	16650	0.0618018	2.96506	8.68011e-05	3.54306e-07	3.3914e-05
GOTERM_BP_FAT	GO:0051254~positive regulation of RNA metabolic process	42	21.875	2.01275e-08	COPS5, ERBB2, XRCC6, NFKB1, HSPA1A, CDC73, CDH1, LGR4, CTNNB1, AKT1, HSPH1, TNFRSF1A, APP, HNRNPK, NPM1, HSPA5, FBXW11, MYC, HSPA8, WWOX, EGFR, VHL, RELA, TP53, ESR1, LMNA, SNW1, ESR2, SIRT7, CDK2, BRCA1, HDAC5, ADRB2, ILF2, PSMC4, PSMC2, IKBKG, UBC, AIRE, RIPK2, CAND1, ZNF746	191	1415	16650	0.084985	2.58746	9.77346e-05	3.97314e-07	3.8186e-05
GOTERM_BP_FAT	GO:0001934~positive regulation of protein phosphorylation	32	16.6667	2.5424e-08	HSP90AB1, GNAI2, ERBB3, ERBB2, SNCA, PTEN, IQGAP1, CTNNB1, RPS3, RACK1, AKT1, HSPH1, TNFRSF1A, SHC1, HSPA5, SYK, PRKCA, EGFR, ICAM1, TP53, MAPK10, CDK5, STK4, ANXA2, ADRB2, ARRB2, NTRK1, IKBKG, UBC, RIPK2, LRRK2, CRK	191	890	16650	0.0534535	3.1343	0.000123451	4.93836e-07	4.82346e-05
GOTERM_BP_FAT	GO:0045934~negative regulation of nucleobase-containing compound metabolic process	41	21.3542	2.58313e-08	XPO1, GNAI2, XRCC6, SNCA, NFKB1, CDC73, LGR4, CTNNB1, RPS3, CUL3, EZR, HNRNPK, CRY2, TARDBP, MYC, FBXW11, HSPA8, PINX1, ENO1, PRKCA, NF2, VHL, RELA, TP53, ESR1, SNW1, ESR2, SIRT7, HNRNPA1, CDK5, BRCA1, FLNA, SUZ12, HDAC5, OTUB1, RPS14, YWHAQ, UBC, MDM2, ZNF746, HDAC6	191	1371	16650	0.0823423	2.60692	0.000125429	4.99749e-07	4.90073e-05
GOTERM_BP_FAT	GO:0010629~negative regulation of gene expression	43	22.3958	2.59343e-08	XPO1, XRCC6, SNCA, NFKB1, CDC73, LGR4, CTNNB1, RPS3, RACK1, AKT1, CUL3, EZR, HNRNPK, CRY2, TARDBP, NOS2, RANBP2, FBXW11, MYC, GAPDH, HSPA8, ENO1, EGFR, VHL, FLOT2, RELA, TP53, ESR1, SNW1, ESR2, SIRT7, CDK5, BRCA1, FLNA, HDAC5, SUZ12, RPS14, UBC, YWHAQ, MDM2, ZNF746, LRRK2, HDAC6	191	1485	16650	0.0891892	2.52419	0.000125929	4.99749e-07	4.92026e-05
GOTERM_BP_FAT	GO:0010562~positive regulation of phosphorus metabolic process	35	18.2292	2.86755e-08	HSP90AB1, GNAI2, ERBB3, ERBB2, SNCA, PTEN, IQGAP1, CTNNB1, RPS3, RACK1, AKT1, HSPH1, TNFRSF1A, SHC1, HSPA5, NOS2, MYC, SYK, PRKCA, EGFR, ICAM1, TP53, MAPK10, CDK5, STK4, ANXA2, ADRB2, ARRB2, VCP, NTRK1, IKBKG, UBC, RIPK2, LRRK2, CRK	191	1049	16650	0.063003	2.90853	0.000139239	5.41823e-07	5.44033e-05
GOTERM_BP_FAT	GO:0045937~positive regulation of phosphate metabolic process	35	18.2292	2.86755e-08	HSP90AB1, GNAI2, ERBB3, ERBB2, SNCA, PTEN, IQGAP1, CTNNB1, RPS3, RACK1, AKT1, HSPH1, TNFRSF1A, SHC1, HSPA5, NOS2, MYC, SYK, PRKCA, EGFR, ICAM1, TP53, MAPK10, CDK5, STK4, ANXA2, ADRB2, ARRB2, VCP, NTRK1, IKBKG, UBC, RIPK2, LRRK2, CRK	191	1049	16650	0.063003	2.90853	0.000139239	5.41823e-07	5.44033e-05
GOTERM_BP_FAT	GO:0042127~regulation of cell proliferation	44	22.9167	3.08379e-08	GNAI2, ERBB3, ERBB2, XRCC6, CDC73, PTEN, CTNNB1, VCAM1, AKT1, CUL3, CUL2, TNFRSF1A, NPM1, TGM2, SHC1, NOS2, EMD, MYC, CUL1, FN1, SYK, PINX1, PRKCA, EGFR, CAPNS1, NF2, LGALS3, VHL, RELA, TP53, ESR1, LMNA, RPS4X, SLC9A3R1, STK4, CDK2, BRCA1, ANXA2, CAPN1, SUZ12, NTRK1, RIPK2, MDM2, LRRK2	191	1552	16650	0.0932132	2.47139	0.000149737	5.7818e-07	5.85057e-05
GOTERM_BP_FAT	GO:0006461~protein complex assembly	42	21.875	3.62485e-08	DERL1, GRB2, XRCC6, SNCA, ARF6, CDC73, RDX, CCT2, RPS3, CTNNB1, RACK1, CUL3, TNFRSF1A, NPM1, TGM2, HSPA4, MSN, TUBG1, MYC, FN1, ICAM1, TCP1, HSP90AA1, TP53, PRKAB1, SLC9A3R1, SLC9A3R2, ANXA2, IKBKE, ADRB2, PSMC4, VCP, PSMD11, PSMC2, IPO5, MDM2, CAND1, RUVBL1, AMFR, LRRK2, SPTAN1, HDAC6	191	1445	16650	0.0867868	2.53374	0.000176007	6.77011e-07	6.87708e-05
GOTERM_BP_FAT	GO:0070271~protein complex biogenesis	42	21.875	3.69544e-08	DERL1, GRB2, XRCC6, SNCA, ARF6, CDC73, RDX, CCT2, RPS3, CTNNB1, RACK1, CUL3, TNFRSF1A, NPM1, TGM2, HSPA4, MSN, TUBG1, MYC, FN1, ICAM1, TCP1, HSP90AA1, TP53, PRKAB1, SLC9A3R1, SLC9A3R2, ANXA2, IKBKE, ADRB2, PSMC4, VCP, PSMD11, PSMC2, IPO5, MDM2, CAND1, RUVBL1, AMFR, LRRK2, SPTAN1, HDAC6	191	1446	16650	0.0868468	2.53199	0.000179434	6.8755e-07	7.011e-05
GOTERM_BP_FAT	GO:0060429~epithelium development	35	18.2292	3.69818e-08	GRB2, RDX, CLTC, TAGLN2, LGR4, IQGAP1, CTNNB1, AKT1, TNFRSF1A, EZR, PSMB1, PSMD1, PSMD2, TGM2, MSN, MYC, EGFR, ICAM1, RPSA, NF2, LGALS3, RELA, ESR1, SLC9A3R1, STK4, FLNA, ARRB2, PSMC4, PSMD11, NTRK1, PSMC2, PSMA3, UBC, AIRE, SMURF1	191	1060	16650	0.0636637	2.87835	0.000179568	6.85434e-07	7.0162e-05
GOTERM_BP_FAT	GO:0009890~negative regulation of biosynthetic process	43	22.3958	3.72414e-08	XPO1, GNAI2, XRCC6, SNCA, NFKB1, CDC73, CLTC, LGR4, CTNNB1, RPS3, RACK1, CUL3, EZR, CRY2, TARDBP, MYC, GAPDH, FBXW11, HSPA8, PINX1, ENO1, PRKCA, EGFR, NF2, VHL, RELA, TP53, ESR1, SNW1, ESR2, SIRT7, HNRNPA1, CDK5, BRCA1, FLNA, SUZ12, HDAC5, RPS14, UBC, YWHAQ, MDM2, ZNF746, HDAC6	191	1504	16650	0.0903303	2.49231	0.000180828	6.87621e-07	7.06545e-05
GOTERM_BP_FAT	GO:1902533~positive regulation of intracellular signal transduction	32	16.6667	4.77804e-08	GNAI2, ERBB3, ERBB2, HSPA1A, PTEN, IQGAP1, CTNNB1, RPS3, RACK1, TNFRSF1A, TGM2, SHC1, SYK, PRKCA, EGFR, ICAM1, HTT, RELA, CBL, TP53, MAPK10, SLC9A3R1, FLNA, IKBKE, ADRB2, ARRB2, NTRK1, IKBKG, UBC, RIPK2, LRRK2, CRK	191	915	16650	0.054955	3.04867	0.000231994	8.59338e-07	9.0649e-05
GOTERM_BP_FAT	GO:1903508~positive regulation of nucleic acid-templated transcription	40	20.8333	5.13125e-08	COPS5, ERBB2, XRCC6, NFKB1, CDC73, CDH1, LGR4, CTNNB1, AKT1, HSPH1, TNFRSF1A, APP, HNRNPK, NPM1, HSPA5, FBXW11, MYC, WWOX, EGFR, VHL, RELA, TP53, ESR1, LMNA, SNW1, ESR2, SIRT7, CDK2, BRCA1, HDAC5, ADRB2, ILF2, PSMC4, PSMC2, IKBKG, UBC, AIRE, RIPK2, CAND1, ZNF746	191	1349	16650	0.081021	2.58481	0.000249142	9.09391e-07	9.73501e-05
GOTERM_BP_FAT	GO:0045893~positive regulation of transcription, DNA-templated	40	20.8333	5.13125e-08	COPS5, ERBB2, XRCC6, NFKB1, CDC73, CDH1, LGR4, CTNNB1, AKT1, HSPH1, TNFRSF1A, APP, HNRNPK, NPM1, HSPA5, FBXW11, MYC, WWOX, EGFR, VHL, RELA, TP53, ESR1, LMNA, SNW1, ESR2, SIRT7, CDK2, BRCA1, HDAC5, ADRB2, ILF2, PSMC4, PSMC2, IKBKG, UBC, AIRE, RIPK2, CAND1, ZNF746	191	1349	16650	0.081021	2.58481	0.000249142	9.09391e-07	9.73501e-05
GOTERM_BP_FAT	GO:0010558~negative regulation of macromolecule biosynthetic process	41	21.3542	6.48711e-08	XPO1, XRCC6, SNCA, NFKB1, CDC73, CLTC, LGR4, CTNNB1, RPS3, RACK1, CUL3, EZR, CRY2, TARDBP, MYC, GAPDH, FBXW11, HSPA8, PINX1, ENO1, EGFR, NF2, VHL, RELA, TP53, ESR1, SNW1, ESR2, SIRT7, HNRNPA1, CDK5, BRCA1, FLNA, SUZ12, HDAC5, RPS14, UBC, YWHAQ, MDM2, ZNF746, HDAC6	191	1418	16650	0.0851652	2.52051	0.000314964	1.14135e-06	0.000123074
GOTERM_BP_FAT	GO:0031327~negative regulation of cellular biosynthetic process	42	21.875	7.03363e-08	XPO1, GNAI2, XRCC6, SNCA, NFKB1, CDC73, LGR4, CTNNB1, RPS3, RACK1, CUL3, EZR, CRY2, TARDBP, MYC, GAPDH, FBXW11, HSPA8, PINX1, ENO1, PRKCA, EGFR, NF2, VHL, RELA, TP53, ESR1, SNW1, ESR2, SIRT7, HNRNPA1, CDK5, BRCA1, FLNA, SUZ12, HDAC5, RPS14, UBC, YWHAQ, MDM2, ZNF746, HDAC6	191	1480	16650	0.0888889	2.47382	0.000341495	1.23304e-06	0.000133442
GOTERM_BP_FAT	GO:1902680~positive regulation of RNA biosynthetic process	40	20.8333	7.58945e-08	COPS5, ERBB2, XRCC6, NFKB1, CDC73, CDH1, LGR4, CTNNB1, AKT1, HSPH1, TNFRSF1A, APP, HNRNPK, NPM1, HSPA5, FBXW11, MYC, WWOX, EGFR, VHL, RELA, TP53, ESR1, LMNA, SNW1, ESR2, SIRT7, CDK2, BRCA1, HDAC5, ADRB2, ILF2, PSMC4, PSMC2, IKBKG, UBC, AIRE, RIPK2, CAND1, ZNF746	191	1369	16650	0.0822222	2.54705	0.000368476	1.3257e-06	0.000143987
GOTERM_BP_FAT	GO:2000113~negative regulation of cellular macromolecule biosynthetic process	39	20.3125	9.54661e-08	XPO1, XRCC6, SNCA, NFKB1, CDC73, LGR4, CTNNB1, RPS3, RACK1, CUL3, EZR, CRY2, MYC, GAPDH, FBXW11, HSPA8, PINX1, ENO1, EGFR, NF2, VHL, RELA, TP53, ESR1, SNW1, ESR2, SIRT7, HNRNPA1, CDK5, BRCA1, FLNA, SUZ12, HDAC5, RPS14, YWHAQ, UBC, MDM2, ZNF746, HDAC6	191	1324	16650	0.0795195	2.56778	0.000463476	1.64391e-06	0.000181119
GOTERM_BP_FAT	GO:0040011~locomotion	42	21.875	1.73927e-07	GRB2, ERBB3, ERBB2, RDX, PTEN, IQGAP1, CTNNB1, RACK1, VCAM1, AKT1, CUL3, APP, EZR, DNAJA1, SHC1, HSPA5, MSN, MYC, TUBB3, FN1, SYK, PRKCA, EGFR, ICAM1, HSP90AA1, NF2, LGALS3, LMNA, ITGA4, MYH9, SLC9A3R1, CDK5, FLNA, HDAC5, ARRB2, NTRK1, AIRE, HSPB1, MDM2, LRRK2, SPTAN1, HDAC6	191	1530	16650	0.0918919	2.39298	0.000844233	2.90236e-06	0.000329974
GOTERM_BP_FAT	GO:0051050~positive regulation of transport	31	16.1458	1.86012e-07	HSP90AB1, YWHAZ, ERBB2, SNCA, RDX, CDH1, RACK1, AKT1, EZR, HNRNPK, TARDBP, MSN, EMD, SYK, EGFR, HSP90AA1, LGALS3, HTT, CBL, TP53, CFTR, CDK5, FLNA, ANXA2, YWHAG, ARRB2, HUWE1, IPO5, YWHAQ, MDM2, RUVBL1	191	920	16650	0.0552553	2.93734	0.000902867	3.0934e-06	0.000352902
GOTERM_BP_FAT	GO:0045595~regulation of cell differentiation	42	21.875	2.22234e-07	IQCB1, HSP90AB1, ERBB2, NFKB1, ARF6, CDC73, AURKA, PTEN, IQGAP1, CTNNB1, AKT1, TNFRSF1A, APP, CUL7, ISG15, UBASH3B, OBSL1, MYC, FN1, SYK, PRKCA, EGFR, NF2, LGALS3, VHL, RELA, FLOT2, SNW1, CDK5, STK4, FLNA, HDAC5, SUZ12, YWHAG, ARRB2, NTRK1, MDM2, RIPK2, SMURF1, LRRK2, CRK, HDAC6	191	1544	16650	0.0927327	2.37128	0.00107858	3.60925e-06	0.000421621
GOTERM_BP_FAT	GO:0007167~enzyme linked receptor protein signaling pathway	31	16.1458	4.03475e-07	HSP90AB1, ERBB3, GRB2, ERBB2, SNCA, HSPA1A, PTEN, IQGAP1, CTNNB1, ACTG1, AKT1, HNRNPM, APP, SHC1, HSPA5, SYK, ACTB, EGFR, HSP90AA1, RELA, CBL, SNW1, SLC9A3R1, HNRNPA1, ADRB2, ARRB2, NTRK1, UBC, HSPB1, SMURF1, CRK	191	954	16650	0.0572973	2.83266	0.00195736	6.23972e-06	0.000765472
GOTERM_BP_FAT	GO:0033993~response to lipid	29	15.1042	5.18447e-07	SNCA, NFKB1, CDC73, CAD, PTEN, CTNNB1, VCAM1, AKT1, TNFRSF1A, CRY2, RPLP0, DNAJA1, MSN, NOS2, MYC, PRKCA, EGFR, ICAM1, RELA, ESR1, SNW1, EEF2, ESR2, BRCA1, HDAC5, ARRB2, MDM2, RIPK2, HDAC6	191	860	16650	0.0516517	2.93955	0.00251441	7.8429e-06	0.000983595
GOTERM_BP_FAT	GO:0006952~defense response	40	20.8333	1.08122e-06	HSP90AB1, SNCA, NFKB1, HSPA1A, LGR4, VCAM1, AKT1, TNFRSF1A, TUBB, APP, LGALS3BP, PSMB1, ISG15, PSMD1, PSMD2, TGM2, NOS2, FBXW11, MYC, GAPDH, CUL1, TUBB4B, SYK, FN1, EGFR, ICAM1, LGALS3, FLOT2, RELA, ESR1, HDAC5, IKBKE, ARRB2, PSMC4, PSMD11, PSMC2, PSMA3, IKBKG, UBC, RIPK2	191	1518	16650	0.0911712	2.29704	0.00523666	1.56261e-05	0.00205128
GOTERM_BP_FAT	GO:0051276~chromosome organization	34	17.7083	1.48915e-06	XPO1, COPS5, XRCC6, SNCA, CDC73, CCT2, AURKA, CTNNB1, CUL3, NPM1, RANBP2, MYC, PINX1, ACTB, PRKCA, DHX9, TCP1, TP53, ESR1, SNW1, CCT6A, SIRT7, HNRNPA1, MCM5, BRCA1, CDK2, SUZ12, HDAC5, CCT4, HUWE1, OTUB1, UBC, RUVBL1, HDAC6	191	1184	16650	0.0711111	2.50327	0.00720522	2.07199e-05	0.00282518
GOTERM_BP_FAT	GO:0032989~cellular component morphogenesis	36	18.75	2.16318e-06	IQCB1, GRB2, ERBB2, RDX, AURKA, PTEN, IQGAP1, CTNNB1, ACTG1, CUL3, APP, EZR, CUL7, KRT8, OBSL1, MSN, TUBB3, FN1, EGFR, ICAM1, VHL, HTT, ACTN1, ITGA4, MYH9, SLC9A3R1, CDK5, STK4, FLNA, NOLC1, NTRK1, SMURF1, LRRK2, CRK, SPTAN1, HDAC6	191	1321	16650	0.0793393	2.37564	0.0104494	2.89374e-05	0.00410392
GOTERM_BP_FAT	GO:0009887~organ morphogenesis	30	15.625	2.79366e-06	CLTC, PTEN, LGR4, CTNNB1, CUL3, EZR, PSMB1, PSMD1, PSMD2, TGM2, MSN, MYC, CUL1, WWOX, SYK, EGFR, NF2, RELA, ESR1, SLC9A3R1, CAPN1, ARRB2, PSMC4, PSMD11, PSMC2, PSMA3, UBC, MDM2, SMURF1, LRRK2	191	992	16650	0.0595796	2.63627	0.0134744	3.65654e-05	0.00530001
GOTERM_BP_FAT	GO:0051336~regulation of hydrolase activity	36	18.75	2.83806e-06	HSP90AB1, GRB2, ERBB3, ERBB2, SNCA, HSPA1A, RDX, RCC1, IQGAP1, RPS3, RACK1, AKT1, APP, CRY2, NPM1, SHC1, HSPA5, MYC, FN1, EGFR, ICAM1, GABARAPL2, HTT, TP53, ESR1, ARRB2, VCP, NTRK1, PSMA3, IPO5, MDM2, LRRK2, CRK, AHSA1, CCDC8, SPTAN1	191	1337	16650	0.0803003	2.34721	0.0136871	3.70468e-05	0.00538425
GOTERM_BP_FAT	GO:0006259~DNA metabolic process	30	15.625	2.9646e-06	COPS5, XRCC6, CCT2, CTNNB1, RPS3, AKT1, CRY2, ISG15, NPM1, FBXO6, SHC1, MYC, PINX1, EGFR, TCP1, NF2, TP53, CCT6A, HNRNPA1, BRCA1, CDK2, MCM5, CCT4, ARRB2, VCP, HUWE1, OTUB1, UBC, RUVBL1, KPNA1	191	995	16650	0.0597598	2.62832	0.014293	3.85948e-05	0.00562431
GOTERM_BP_FAT	GO:0000902~cell morphogenesis	34	17.7083	4.04769e-06	IQCB1, GRB2, ERBB2, RDX, AURKA, PTEN, IQGAP1, CTNNB1, CUL3, APP, EZR, CUL7, OBSL1, MSN, TUBB3, FN1, EGFR, ICAM1, VHL, HTT, ACTN1, ITGA4, MYH9, SLC9A3R1, CDK5, STK4, FLNA, NOLC1, NTRK1, SMURF1, LRRK2, CRK, HDAC6, SPTAN1	191	1240	16650	0.0744745	2.39022	0.0194637	5.092e-05	0.00767902
GOTERM_BP_FAT	GO:0051253~negative regulation of RNA metabolic process	34	17.7083	4.04769e-06	XPO1, XRCC6, SNCA, NFKB1, CDC73, LGR4, CTNNB1, CUL3, CRY2, HNRNPK, EZR, TARDBP, MYC, FBXW11, HSPA8, ENO1, VHL, RELA, TP53, ESR1, SNW1, SIRT7, ESR2, CDK5, BRCA1, FLNA, SUZ12, HDAC5, RPS14, YWHAQ, UBC, MDM2, ZNF746, HDAC6	191	1240	16650	0.0744745	2.39022	0.0194637	5.092e-05	0.00767902
GOTERM_BP_FAT	GO:0016477~cell migration	33	17.1875	4.21268e-06	GRB2, RDX, PTEN, IQGAP1, CTNNB1, RACK1, VCAM1, AKT1, CUL3, SHC1, HSPA5, MSN, MYC, SYK, FN1, PRKCA, EGFR, ICAM1, HSP90AA1, NF2, LGALS3, ITGA4, MYH9, SLC9A3R1, CDK5, FLNA, HDAC5, ARRB2, AIRE, HSPB1, MDM2, LRRK2, HDAC6	191	1184	16650	0.0711111	2.42965	0.020249	5.25868e-05	0.00799201
GOTERM_BP_FAT	GO:0045892~negative regulation of transcription, DNA-templated	32	16.6667	4.50161e-06	XPO1, XRCC6, SNCA, NFKB1, CDC73, LGR4, CTNNB1, CUL3, CRY2, EZR, MYC, FBXW11, HSPA8, ENO1, VHL, RELA, TP53, ESR1, SNW1, SIRT7, ESR2, CDK5, BRCA1, FLNA, SUZ12, HDAC5, RPS14, YWHAQ, UBC, MDM2, ZNF746, HDAC6	191	1130	16650	0.0678679	2.46861	0.0216227	5.57634e-05	0.00854012
GOTERM_BP_FAT	GO:1902679~negative regulation of RNA biosynthetic process	33	17.1875	5.0182e-06	XPO1, XRCC6, SNCA, NFKB1, CDC73, LGR4, CTNNB1, CUL3, CRY2, EZR, TARDBP, MYC, FBXW11, HSPA8, ENO1, VHL, RELA, TP53, ESR1, SNW1, SIRT7, ESR2, CDK5, BRCA1, FLNA, SUZ12, HDAC5, RPS14, YWHAQ, UBC, MDM2, ZNF746, HDAC6	191	1194	16650	0.0717117	2.4093	0.0240739	6.15346e-05	0.00952012
GOTERM_BP_FAT	GO:0048870~cell motility	35	18.2292	6.75279e-06	GRB2, RDX, PTEN, IQGAP1, CTNNB1, RACK1, VCAM1, AKT1, CUL3, DNAJA1, SHC1, HSPA5, MSN, MYC, SYK, FN1, PRKCA, EGFR, ICAM1, HSP90AA1, NF2, LGALS3, LMNA, ITGA4, MYH9, SLC9A3R1, CDK5, FLNA, HDAC5, ARRB2, AIRE, HSPB1, MDM2, LRRK2, HDAC6	191	1330	16650	0.0798799	2.29402	0.0322598	8.07644e-05	0.0128106
GOTERM_BP_FAT	GO:0051674~localization of cell	35	18.2292	6.75279e-06	GRB2, RDX, PTEN, IQGAP1, CTNNB1, RACK1, VCAM1, AKT1, CUL3, DNAJA1, SHC1, HSPA5, MSN, MYC, SYK, FN1, PRKCA, EGFR, ICAM1, HSP90AA1, NF2, LGALS3, LMNA, ITGA4, MYH9, SLC9A3R1, CDK5, FLNA, HDAC5, ARRB2, AIRE, HSPB1, MDM2, LRRK2, HDAC6	191	1330	16650	0.0798799	2.29402	0.0322598	8.07644e-05	0.0128106
GOTERM_BP_FAT	GO:0045944~positive regulation of transcription from RNA polymerase II promoter	30	15.625	7.1277e-06	COPS5, XRCC6, NFKB1, CDC73, CTNNB1, AKT1, HSPH1, TNFRSF1A, APP, HNRNPK, HSPA5, MYC, WWOX, EGFR, RELA, TP53, LMNA, ESR1, SNW1, BRCA1, HDAC5, ADRB2, PSMC4, PSMC2, IKBKG, AIRE, UBC, RIPK2, CAND1, ZNF746	191	1041	16650	0.0625225	2.51218	0.0340201	8.48304e-05	0.0135218
GOTERM_BP_FAT	GO:1903507~negative regulation of nucleic acid-templated transcription	32	16.6667	1.02159e-05	XPO1, XRCC6, SNCA, NFKB1, CDC73, LGR4, CTNNB1, CUL3, CRY2, EZR, MYC, FBXW11, HSPA8, ENO1, VHL, RELA, TP53, ESR1, SNW1, SIRT7, ESR2, CDK5, BRCA1, FLNA, SUZ12, HDAC5, RPS14, YWHAQ, UBC, MDM2, ZNF746, HDAC6	191	1177	16650	0.0706907	2.37003	0.048398	0.00011839	0.0193798
GOTERM_BP_FAT	GO:0001775~cell activation	27	14.0625	1.44864e-05	YWHAZ, GRB2, ERBB2, SNCA, CTNNB1, ACTG1, VCAM1, AKT1, HSPH1, UBASH3B, SYK, ACTB, EGFR, PRKCA, ICAM1, LGALS3, FLOT2, ACTN1, ITGA4, MYH9, FLNA, HDAC5, ARRB2, NTRK1, AIRE, HSPB1, RIPK2	191	910	16650	0.0546547	2.58644	0.0679292	0.00016245	0.0274801
GOTERM_BP_FAT	GO:0030030~cell projection organization	33	17.1875	2.83898e-05	IQCB1, LIMA1, GRB2, ERBB2, ARF6, RDX, AURKA, CDH1, PTEN, IQGAP1, AKT1, CUL3, APP, EZR, CUL7, OBSL1, TUBB3, FN1, EGFR, ICAM1, HSP90AA1, HTT, MYH9, SLC9A3R1, CDK5, FLNA, NOLC1, NTRK1, MDM2, SMURF1, LRRK2, HDAC6, SPTAN1	191	1301	16650	0.0781381	2.21115	0.128782	0.000303617	0.0538475
GOTERM_BP_FAT	GO:0045597~positive regulation of cell differentiation	25	13.0208	3.25024e-05	HSP90AB1, NFKB1, AURKA, IQGAP1, CTNNB1, AKT1, ISG15, CUL7, OBSL1, MYC, SYK, FN1, PRKCA, LGALS3, NF2, VHL, RELA, SNW1, STK4, FLNA, ARRB2, NTRK1, RIPK2, SMURF1, CRK	191	841	16650	0.0505105	2.59134	0.146009	0.000343806	0.0616456
GOTERM_BP_FAT	GO:0008284~positive regulation of cell proliferation	25	13.0208	3.7802e-05	GNAI2, ERBB2, PTEN, CTNNB1, VCAM1, AKT1, CUL3, NPM1, TGM2, SHC1, MYC, SYK, FN1, EGFR, PRKCA, CAPNS1, RELA, ESR1, RPS4X, CDK2, ANXA2, CAPN1, SUZ12, MDM2, RIPK2	191	849	16650	0.050991	2.56693	0.167706	0.000394696	0.0716937
GOTERM_BP_FAT	GO:0051240~positive regulation of multicellular organismal process	34	17.7083	7.46959e-05	ERBB3, XRCC6, NFKB1, HSPA1A, AURKA, LGR4, IQGAP1, CTNNB1, RACK1, AKT1, EZR, CUL7, ISG15, OBSL1, NOS2, MYC, SYK, FN1, PRKCA, EGFR, ICAM1, DHX9, HSP90AA1, LGALS3, RELA, SNW1, BRCA1, ADRB2, ARRB2, NTRK1, RIPK2, HSPB1, SMURF1, HDAC6	191	1431	16650	0.0859459	2.07119	0.304231	0.000749176	0.141618
GOTERM_BP_FAT	GO:0022008~neurogenesis	34	17.7083	9.24995e-05	GRB2, ERBB3, ERBB2, ARF6, AURKA, CDH1, PTEN, IQGAP1, CTNNB1, AKT1, APP, EZR, CUL7, OBSL1, MYC, TUBB3, FN1, EGFR, HSP90AA1, NF2, RELA, SNW1, EEF2, SLC9A3R1, CDK5, HDAC5, YWHAG, NOLC1, NTRK1, MDM2, SMURF1, LRRK2, HDAC6, SPTAN1	191	1447	16650	0.0869069	2.04829	0.361861	0.000912588	0.175345
GOTERM_BP_FAT	GO:0042592~homeostatic process	37	19.2708	9.80071e-05	IQCB1, DERL1, PDIA3, XRCC6, SNCA, CCT2, LGR4, STAU1, CTNNB1, RACK1, ACTG1, AKT1, APP, CRY2, ISG15, UBASH3B, TGM2, RANBP2, NOS2, MYC, PINX1, SYK, ACTB, EGFR, ICAM1, TCP1, HTT, ESR1, CFTR, CCT6A, SLC9A3R1, HNRNPA1, ADRB2, CCT4, RPS14, HSPB1, LRRK2	191	1645	16650	0.0987988	1.96073	0.378703	0.000959108	0.185776
GOTERM_BP_FAT	GO:0051094~positive regulation of developmental process	28	14.5833	0.000113522	ERBB3, AURKA, LGR4, IQGAP1, CTNNB1, RACK1, EZR, CUL7, ISG15, OBSL1, MYC, SYK, FN1, PRKCA, LGALS3, HTT, RELA, LMNA, SNW1, BRCA1, FLNA, ADRB2, ARRB2, NTRK1, RIPK2, HSPB1, SMURF1, CRK	191	1089	16650	0.0654054	2.24136	0.423796	0.00109324	0.215154
GOTERM_BP_FAT	GO:0009725~response to hormone	24	12.5	0.000115005	EGFR, ICAM1, GNAI2, GRB2, RELA, ESR1, NFKB1, RDX, CAD, ESR2, IQGAP1, BRCA1, ANXA2, CTNNB1, AKT1, HDAC5, YWHAG, CRY2, ARRB2, DNAJA1, MDM2, SHC1, MYC, HDAC6	191	854	16650	0.0512913	2.44982	0.427931	0.00110314	0.217962
GOTERM_BP_FAT	GO:0051345~positive regulation of hydrolase activity	25	13.0208	0.000125362	EGFR, HSP90AB1, ICAM1, GABARAPL2, ERBB3, GRB2, ERBB2, SNCA, ESR1, HSPA1A, RCC1, IQGAP1, RPS3, AKT1, RACK1, APP, VCP, NTRK1, SHC1, HSPA5, LRRK2, AHSA1, MYC, FN1, SPTAN1	191	917	16650	0.0550751	2.37658	0.455994	0.00118373	0.237569
GOTERM_BP_FAT	GO:0048699~generation of neurons	32	16.6667	0.000151061	GRB2, ERBB2, ARF6, AURKA, CDH1, PTEN, IQGAP1, CTNNB1, AKT1, APP, EZR, CUL7, OBSL1, MYC, TUBB3, FN1, EGFR, HSP90AA1, NF2, RELA, SNW1, SLC9A3R1, CDK5, HDAC5, YWHAG, NOLC1, NTRK1, MDM2, SMURF1, LRRK2, HDAC6, SPTAN1	191	1357	16650	0.0815015	2.05566	0.519827	0.00139637	0.286205
GOTERM_BP_FAT	GO:0051241~negative regulation of multicellular organismal process	26	13.5417	0.00023718	ERBB2, CDC73, ARF6, NFKB1, PTEN, LGR4, CTNNB1, USP19, APP, CRY2, EZR, ISG15, UBASH3B, MYC, FN1, EGFR, CDK5, STK4, ANXA2, HDAC5, IKBKE, ADRB2, ARRB2, UBC, MDM2, SMURF1	191	1017	16650	0.0610811	2.22861	0.683958	0.00208456	0.44902
GOTERM_BP_FAT	GO:0060284~regulation of cell development	23	11.9792	0.000289642	NF2, RELA, AURKA, SNW1, ARF6, CDK5, PTEN, IQGAP1, FLNA, CTNNB1, AKT1, TNFRSF1A, YWHAG, APP, CUL7, NTRK1, OBSL1, MDM2, SMURF1, LRRK2, CRK, MYC, FN1	191	851	16650	0.0511111	2.35602	0.755051	0.00248664	0.548081
GOTERM_BP_FAT	GO:0046903~secretion	27	14.0625	0.000315954	COPS5, ERBB3, SNCA, CAD, CANX, LGR4, APP, LGALS3BP, CRY2, EZR, TARDBP, RPLP0, NOS2, MYC, HSPA8, SYK, FN1, PRKCA, EGFR, ACTN1, CFTR, SLC9A3R1, CDK5, FLNA, ANXA2, TUBA4A, LRRK2	191	1098	16650	0.0659459	2.14359	0.78444	0.0026698	0.597731
GOTERM_BP_FAT	GO:0009607~response to biotic stimulus	23	11.9792	0.000410815	PRKCA, ICAM1, RELA, SNCA, TP53, NFKB1, CDC73, AKT1, VCAM1, HDAC5, IKBKE, TNFRSF1A, APP, ISG15, KRT8, IKBKG, RIPK2, HSPB1, HSPA5, NOS2, MYC, SYK, ENO1	191	873	16650	0.0524324	2.29665	0.864031	0.00335915	0.77653
GOTERM_BP_FAT	GO:1901566~organonitrogen compound biosynthetic process	31	16.1458	0.000428257	COPS5, GNAI2, ERBB2, SNCA, RPS6KB2, NFKB1, CAD, CLTC, RPS3, RACK1, AKT1, TNFRSF1A, RPLP0, NPM1, NOS2, MYC, GAPDH, PRKCA, EGFR, RPSA, EEF1A1, EFTUD2, ESR1, EEF2, RPS4X, ADRB2, RPL23, VCP, RPS14, HSPB1, RPS10	191	1375	16650	0.0825826	1.96535	0.875078	0.0034898	0.809372
GOTERM_BP_FAT	GO:0034622~cellular macromolecular complex assembly	25	13.0208	0.000477328	ICAM1, RPSA, TCP1, HSP90AA1, GRB2, SNCA, CCT2, RDX, ARF6, RPS3, ADRB2, PSMC4, PSMD11, RPS14, PSMC2, NPM1, IPO5, UBC, HSPA4, RPS10, CAND1, RUVBL1, TUBG1, HDAC6, SPTAN1	191	1004	16650	0.0603003	2.17064	0.901575	0.00385664	0.901714
GOTERM_BP_FAT	GO:0048646~anatomical structure formation involved in morphogenesis	27	14.0625	0.000644442	IQCB1, GRB2, CDC73, PTEN, CTNNB1, CUL3, ACTG1, KRT8, TGM2, OBSL1, SHC1, SYK, FN1, PRKCA, NF2, HTT, ACTN1, ITGA4, MYH9, CDK5, STK4, BRCA1, FLNA, ANXA2, HDAC5, NTRK1, HSPB1	191	1151	16650	0.0691291	2.04489	0.956301	0.00501215	1.21558
GOTERM_BP_FAT	GO:0006396~RNA processing	23	11.9792	0.000716131	EGFR, RPSA, DHX9, LGALS3, EFTUD2, ESR1, SNW1, CDC73, HSPA1A, RPS4X, HNRNPA1, RPS3, HNRNPM, APP, HNRNPK, RPL23, NOLC1, RPS14, TARDBP, RPLP0, SRRM1, RPS10, HSPA8	191	910	16650	0.0546547	2.20327	0.969155	0.00552414	1.34994
GOTERM_BP_FAT	GO:0043603~cellular amide metabolic process	24	12.5	0.00097843	EGFR, RPSA, EEF1A1, COPS5, EFTUD2, ERBB2, ESR1, RPS6KB2, CAD, EEF2, RPS4X, RPS3, AKT1, RACK1, TNFRSF1A, APP, RPL23, RPS14, RPLP0, NPM1, AIRE, HSPB1, RPS10, GAPDH	191	994	16650	0.0596997	2.10478	0.991379	0.00729771	1.84005
GOTERM_BP_FAT	GO:0072358~cardiovascular system development	23	11.9792	0.00117035	PRKCA, EGFR, ERBB3, ERBB2, LMNA, CAD, MYH9, STK4, PTEN, BRCA1, ANXA2, CTNNB1, AKT1, HDAC5, CUL7, ARRB2, NTRK1, OBSL1, HSPB1, MDM2, SHC1, FN1, SYK	191	945	16650	0.0567568	2.12167	0.996609	0.00856604	2.19719
GOTERM_BP_FAT	GO:0072359~circulatory system development	23	11.9792	0.00117035	PRKCA, EGFR, ERBB3, ERBB2, LMNA, CAD, MYH9, STK4, PTEN, BRCA1, ANXA2, CTNNB1, AKT1, HDAC5, CUL7, ARRB2, NTRK1, OBSL1, HSPB1, MDM2, SHC1, FN1, SYK	191	945	16650	0.0567568	2.12167	0.996609	0.00856604	2.19719
GOTERM_BP_FAT	GO:0048666~neuron development	23	11.9792	0.00152794	EGFR, GRB2, ERBB2, CDH1, AURKA, ARF6, SLC9A3R1, CDK5, PTEN, IQGAP1, APP, EZR, CUL7, NOLC1, NTRK1, OBSL1, MDM2, SMURF1, LRRK2, TUBB3, FN1, HDAC6, SPTAN1	191	965	16650	0.057958	2.07769	0.999404	0.0107814	2.85935
GOTERM_BP_FAT	GO:0030182~neuron differentiation	26	13.5417	0.00333395	GRB2, ERBB2, AURKA, CDH1, ARF6, PTEN, IQGAP1, CTNNB1, AKT1, APP, EZR, CUL7, OBSL1, TUBB3, FN1, EGFR, SLC9A3R1, CDK5, HDAC5, NOLC1, NTRK1, MDM2, SMURF1, LRRK2, HDAC6, SPTAN1	191	1226	16650	0.0736336	1.84869	1	0.021362	6.13921
GOTERM_BP_FAT	GO:0044702~single organism reproductive process	25	13.0208	0.00697114	HSP90AB1, GRB2, CCT2, AURKA, PTEN, LGR4, CTNNB1, AKT1, CUL7, KRT8, DNAJA1, TUBG1, MYC, EGFR, ICAM1, TCP1, ESR1, CFTR, MYH9, STK4, CDK2, CCT4, ARRB2, NTRK1, RUVBL1	191	1231	16650	0.0739339	1.77037	1	0.0409231	12.429
GOTERM_BP_FAT	GO:0022414~reproductive process	27	14.0625	0.0072467	HSP90AB1, GRB2, CCT2, AURKA, CAD, PTEN, LGR4, CTNNB1, AKT1, APP, CUL7, KRT8, DNAJA1, TUBG1, MYC, EGFR, ICAM1, TCP1, ESR1, CFTR, MYH9, STK4, CDK2, CCT4, ARRB2, NTRK1, RUVBL1	191	1373	16650	0.0824625	1.71425	1	0.0421565	12.8889
GOTERM_BP_FAT	GO:0032940~secretion by cell	21	10.9375	0.00725787	PRKCA, EGFR, COPS5, SNCA, ACTN1, CFTR, CANX, CDK5, LGR4, FLNA, LGALS3BP, APP, CRY2, EZR, TARDBP, TUBA4A, NOS2, LRRK2, HSPA8, FN1, SYK	191	966	16650	0.058018	1.89506	1	0.04217	12.9074
GOTERM_BP_FAT	GO:0000003~reproduction	27	14.0625	0.00738007	HSP90AB1, GRB2, CCT2, AURKA, CAD, PTEN, LGR4, CTNNB1, AKT1, APP, CUL7, KRT8, DNAJA1, TUBG1, MYC, EGFR, ICAM1, TCP1, ESR1, CFTR, MYH9, STK4, CDK2, CCT4, ARRB2, NTRK1, RUVBL1	191	1375	16650	0.0825826	1.71176	1	0.0427652	13.1106
